# Supplementary material
Source: Research Square preprint supplement (doi:10.21203/rs.3.rs-9554211/v1)
Supplement: Supplementary file 1 [file 1c5f9a97901e40a6c9c00c6b.xlsx]

## Sheet: PUB26
Phosphorylation sites of PUB26 identified by IP-MS after in vitro phosphorylation.
Checked	Confidence	Annotated Sequence	Modifications	# Protein Groups	# Proteins	# PSMs	Master Protein Accessions	Positions in Master Proteins	Modifications in Master Proteins	# Missed Cleavages	Theo. MH+ [Da]	Abundance: F3: Sample	Quan Info	Found in Sample: [S3] F3: Sample	Confidence (by Search Engine): Sequest HT	XCorr (by Search Engine): Sequest HT	Top Apex RT [min]
FALSE	Medium	[W].CVANRSNGVERIPTPKQPADPISVRSLL.[S]	1xCarbamidomethyl [C1]; 3xPhospho [T14(99.4); S23(99.4); S26(99.9)]	1	1	1	PUB26	PUB26 [81-108]	PUB26 3xPhospho [T94(99.4); S103(99.4); S106(99.9)]	1	3314.55		No Quan Values	Medium	Medium	1.42
FALSE	High	[Y].DRTSIDSW.[I]	1xPhospho [T3(99.6)]	1	1	4	PUB26	PUB26 [40-47]	PUB26 1xPhospho [T42(99.6)]	0	1059.41	2.87023e+06		High	High	2.91	54.73
FALSE	Medium	[L].LSQASAITGTHVSVRSRAAAIRRLRGL.[A]	3xPhospho [S16(96.8); S/T]	1	1	1	PUB26	PUB26 [108-134]	PUB26 3xPhospho [S123(96.8); S/T]	2	3087.55		No Quan Values	Medium	Medium	1.47
FALSE	Medium	[L].LVQSDCTERAKRKAQMLL.[K]	1xCarbamidomethyl [C6]; 1xOxidation [M16]; 2xPhospho [S4(100); T7(100)]	1	1	2	PUB26	PUB26 [378-395]	PUB26 2xPhospho [S381(100); T384(100)]	2	2323.07	1.22781e+06		Medium	Medium	1.4	54.85

## Sheet: ATG13a
Phosphorylation sites of ATG13a identified by IP-MS after in vitro phosphorylation.
Checked	Confidence	Annotated Sequence	Modifications	# Protein Groups	# Proteins	# PSMs	Master Protein Accessions	Positions in Master Proteins	Modifications in Master Proteins	# Missed Cleavages	Theo. MH+ [Da]	Abundances (Scaled): F3: Sample	Abundance: F3: Sample	Quan Info	Found in Sample: F3: Sample	Confidence (by Search Engine): Sequest HT	XCorr (by Search Engine): Sequest HT	Top Apex RT [min]
FALSE	Low	[R].SVEGHSFTGR.[A]	2xPhospho [S1(98); S6(98)]	1	1	8		[263-272]	2xPhospho [S263(98); S268(98)]	0	1236.44	100	4.8251e+06		Low	Low	0.32	61.76
FALSE	Medium	[R].SVEGHSFTGR.[A]	1xPhospho [S6(100)]	1	1	21		[263-272]	1xPhospho [S268(100)]	0	1156.48	100	9.12e+07		Medium	Medium	1.77	25.3
FALSE	Medium	[R].TDAFGDNHQLSPPFSPSGSPSTPR.[Y]	1xPhospho [S17(93)]	1	1	21		[327-350]	1xPhospho [S343(93)]	0	2579.12	100	960328		Medium	Medium	1.66	55.09
FALSE	Low	[R].SPSSQDSLPGIALYR.[S]	3xPhospho [S1(87.8); S3(87.8); S4(87.8)]	1	1	1		[404-418]	3xPhospho [S404(87.8); S406(87.8); S407(87.8)]	0	1830.71	100	138331		Low	Low	0.2	87.16
FALSE	Low	[R].RSPSSQDSLPGIALYR.[S]	3xPhospho [S8(90.3); Y15(90.3); S]	1	1	1		[403-418]	3xPhospho [S410(90.3); Y417(90.3); S]	1	1986.81	100	266492		Low	Low	0.13	73.42
FALSE	Low	[R].SGESPSGLMNQYPTQK.[L]	1xOxidation [M9]; 3xPhospho [S1(99.9); S4(99.9); S/Y/T]	1	1	12		[422-437]	3xPhospho [S422(99.9); S425(99.9); S/Y/T]	0	1979.69	100	1.16697e+06		Low	Low	0.25	14.24
FALSE	Low	[K].YDSGRFSGVLSSSDSPR.[F]	3xPhospho [S3(94.6); S15(96.6); S/Y]	1	1	23		[459-475]	3xPhospho [S461(94.6); S473(96.6); S/Y]	1	2056.75	100	4.40792e+06		Low	Low	0.24	83.29
FALSE	High	[K].TSSSISQSLPLGR.[R]	1xPhospho [S6(100)]	1	1	17		[521-533]	1xPhospho [S526(100)]	0	1412.68	100	5.34093e+06		High	High	3.02	52.1
FALSE	Low	[K].TSSSISQSLPLGRR.[S]	3xPhospho [S8(95.9); T/S]	1	1	9		[521-533]	3xPhospho [S528(95.9); T/S]	1	1728.71			No Quan Values	Low	Low	0.25
