# Supplementary material
Source: Research Square preprint supplement (doi:10.21203/rs.3.rs-9554211/v1)
Supplement: Supplementary file 1 [file 2912b38c4c71ff918d012d88.docx]

**Description of Additional Supplementary Files**

**Supplementary Data 1.** Identification of autophagy-related proteins and kinases that interact with PUB26 by IP-MS.

**Supplementary Data 2.** Phosphorylation sites of PUB26 and ATG13a identified by IP-MS after in vitro phosphorylation.

**Supplementary Data 3.** Comparative quantitative phosphoproteomics of WT and *fer-4* mutant from published research (Current biology, Liu et al., 2026; Plant Cell, Jiang et al., 2024).

**Supplementary Data 4.** Oligonucleotide primers, constructs, and plant materials used in this study.
