# Supplementary material
Source: Research Square preprint supplement (doi:10.21203/rs.3.rs-9554211/v1)
Supplement: Supplementary file 2 [file 1f5d401daf4f484b8e035f00.xlsx]

## Sheet: Fig.S1
	Fig.S1e
		Col-0			pub25 26			proPUB25::PUB25 14#			proPUB25::PUB25 43#			proPUB26::PUB26 9#			proPUB26::PUB26 11#
		R1	R2	R3	R1	R2	R3	R1	R2	R3	R1	R2	R3	R1	R2	R3	R1	R2	R3
	+N	1.56324	0.947683	1.19447	0.947683	1.12876	1.50403	1.37026	1.10769	1.07907	1.12362	1.07263	1.19392	1.28436	1.05451	1.3705	1.17939	1.2264	1.12634
	-N	0.168174	0.151708	0.19974	0.360355	0.337094	0.266675	0.167161	0.145526	0.159131	0.151831	0.166456	0.172079	0.190362	0.175737	0.120086	0.208768	0.155773	0.137189
	+N									-N
	Tukey HSD									Tukey HSD
	(I) VAR00001	(J) VAR00001	Mean Difference (I-J)	Std. Error	Sig.	95% Confidence Interval				(I) VAR00001	(J) VAR00001	Mean Difference (I-J)	Std. Error	Sig.	95% Confidence Interval
						Lower Bound	Upper Bound								Lower Bound	Upper Bound
	Col-0	pub25 pub26	0.04164	0.16164	1	-0.5013	0.5846			Col-0	pub25 pub26	-.14817*	0.02573	0.001	-0.2346	-0.0617
		proPUB25::PUB25 14#	0.04946	0.16164	1	-0.4935	0.5924				proPUB25::PUB25 14#	0.01593	0.02573	0.987	-0.0705	0.1024
		proPUB25::PUB25 43#	0.10507	0.16164	0.984	-0.4379	0.648				proPUB25::PUB25 43#	0.00975	0.02573	0.999	-0.0767	0.0962
		proPUB26::PUB26 9#	-0.00132	0.16164	1	-0.5443	0.5416				proPUB26::PUB26 9#	0.01115	0.02573	0.998	-0.0753	0.0976
		proPUB26::PUB26 11#	0.05776	0.16164	0.999	-0.4852	0.6007				proPUB26::PUB26 11#	0.00596	0.02573	1	-0.0805	0.0924
	pub25 pub26	Col-0	-0.04164	0.16164	1	-0.5846	0.5013			pub25 pub26	Col-0	.14817*	0.02573	0.001	0.0617	0.2346
		proPUB25::PUB25 14#	0.00782	0.16164	1	-0.5351	0.5508				proPUB25::PUB25 14#	.16410*	0.02573	0	0.0777	0.2505
		proPUB25::PUB25 43#	0.06343	0.16164	0.998	-0.4795	0.6064				proPUB25::PUB25 43#	.15792*	0.02573	0.001	0.0715	0.2443
		proPUB26::PUB26 9#	-0.04296	0.16164	1	-0.5859	0.5				proPUB26::PUB26 9#	.15931*	0.02573	0.001	0.0729	0.2457
		proPUB26::PUB26 11#	0.01612	0.16164	1	-0.5268	0.5591				proPUB26::PUB26 11#	.15413*	0.02573	0.001	0.0677	0.2406
	proPUB25::PUB25 14#	Col-0	-0.04946	0.16164	1	-0.5924	0.4935			proPUB25::PUB25 14#	Col-0	-0.01593	0.02573	0.987	-0.1024	0.0705
		pub25 pub26	-0.00782	0.16164	1	-0.5508	0.5351				pub25 pub26	-.16410*	0.02573	0	-0.2505	-0.0777
		proPUB25::PUB25 43#	0.05561	0.16164	0.999	-0.4873	0.5985				proPUB25::PUB25 43#	-0.00618	0.02573	1	-0.0926	0.0802
		proPUB26::PUB26 9#	-0.05078	0.16164	0.999	-0.5937	0.4922				proPUB26::PUB26 9#	-0.00479	0.02573	1	-0.0912	0.0816
		proPUB26::PUB26 11#	0.0083	0.16164	1	-0.5346	0.5512				proPUB26::PUB26 11#	-0.00997	0.02573	0.999	-0.0964	0.0765
	proPUB25::PUB25 43#	Col-0	-0.10507	0.16164	0.984	-0.648	0.4379			proPUB25::PUB25 43#	Col-0	-0.00975	0.02573	0.999	-0.0962	0.0767
		pub25 pub26	-0.06343	0.16164	0.998	-0.6064	0.4795				pub25 pub26	-.15792*	0.02573	0.001	-0.2443	-0.0715
		proPUB25::PUB25 14#	-0.05561	0.16164	0.999	-0.5985	0.4873				proPUB25::PUB25 14#	0.00618	0.02573	1	-0.0802	0.0926
		proPUB26::PUB26 9#	-0.1064	0.16164	0.983	-0.6493	0.4365				proPUB26::PUB26 9#	0.00139	0.02573	1	-0.085	0.0878
		proPUB26::PUB26 11#	-0.04732	0.16164	1	-0.5903	0.4956				proPUB26::PUB26 11#	-0.00379	0.02573	1	-0.0902	0.0826
	proPUB26::PUB26 9#	Col-0	0.00132	0.16164	1	-0.5416	0.5443			proPUB26::PUB26 9#	Col-0	-0.01115	0.02573	0.998	-0.0976	0.0753
		pub25 pub26	0.04296	0.16164	1	-0.5	0.5859				pub25 pub26	-.15931*	0.02573	0.001	-0.2457	-0.0729
		proPUB25::PUB25 14#	0.05078	0.16164	0.999	-0.4922	0.5937				proPUB25::PUB25 14#	0.00479	0.02573	1	-0.0816	0.0912
		proPUB25::PUB25 43#	0.1064	0.16164	0.983	-0.4365	0.6493				proPUB25::PUB25 43#	-0.00139	0.02573	1	-0.0878	0.085
		proPUB26::PUB26 11#	0.05908	0.16164	0.999	-0.4839	0.602				proPUB26::PUB26 11#	-0.00518	0.02573	1	-0.0916	0.0812
	proPUB26::PUB26 11#	Col-0	-0.05776	0.16164	0.999	-0.6007	0.4852			proPUB26::PUB26 11#	Col-0	-0.00596	0.02573	1	-0.0924	0.0805
		pub25 pub26	-0.01612	0.16164	1	-0.5591	0.5268				pub25 pub26	-.15413*	0.02573	0.001	-0.2406	-0.0677
		proPUB25::PUB25 14#	-0.0083	0.16164	1	-0.5512	0.5346				proPUB25::PUB25 14#	0.00997	0.02573	0.999	-0.0765	0.0964
		proPUB25::PUB25 43#	0.04732	0.16164	1	-0.4956	0.5903				proPUB25::PUB25 43#	0.00379	0.02573	1	-0.0826	0.0902
		proPUB26::PUB26 9#	-0.05908	0.16164	0.999	-0.602	0.4839				proPUB26::PUB26 9#	0.00518	0.02573	1	-0.0812	0.0916
										* The mean difference is significant at the 0.05 level.
	Fig.S1g
		Col-0			pub25 26			proPUB25::PUB25 14#			proPUB25::PUB25 43#			proPUB26::PUB26 9#			proPUB26::PUB26 11#
		R1	R2	R3	R1	R2	R3	R1	R2	R3	R1	R2	R3	R1	R2	R3	R1	R2	R3
	+N	99.4949	101.348	101.545	102.965	98.3155	100.976	102.981	107.629	95.4993	110.578	95.0265	91.4216	100.835	100.472	102.574	100.993	106.148	96.9842
	-N	58.8456	55.8191	63.0191	67.5887	71.188	69.0743	53.4067	57.1523	51.2123	58.3882	53.8362	56.5775	57.3788	51.6169	55.8666	55.0735	57.3238	58.5045
	+N									-N
	Tukey HSD									Tukey HSD
	(I) VAR00001	(J) VAR00001	Mean Difference (I-J)	Std. Error	Sig.	95% Confidence Interval				(I) VAR00001	(J) VAR00001	Mean Difference (I-J)	Std. Error	Sig.	95% Confidence Interval
						Lower Bound	Upper Bound								Lower Bound	Upper Bound
	Col-0	pub25 pub26	0.04365	4.3484	1	-14.5623	14.6496			Col-0	pub25 pub26	-10.05569*	2.17504	0.006	-17.3615	-2.7499
		proPUB25::PUB25 14#	-1.24042	4.3484	1	-15.8463	13.3655				proPUB25::PUB25 14#	5.30419	2.17504	0.217	-2.0016	12.61
		proPUB25::PUB25 43#	1.78731	4.3484	0.998	-12.8186	16.3932				proPUB25::PUB25 43#	2.96065	2.17504	0.748	-4.3451	10.2664
		proPUB26::PUB26 9#	-0.49749	4.3484	1	-15.1034	14.1084				proPUB26::PUB26 9#	4.27386	2.17504	0.413	-3.0319	11.5797
		proPUB26::PUB26 11#	-0.57907	4.3484	1	-15.185	14.0269				proPUB26::PUB26 11#	2.26069	2.17504	0.896	-5.0451	9.5665
	pub25 pub26	Col-0	-0.04365	4.3484	1	-14.6496	14.5623			pub25 pub26	Col-0	10.05569*	2.17504	0.006	2.7499	17.3615
		proPUB25::PUB25 14#	-1.28407	4.3484	1	-15.89	13.3219				proPUB25::PUB25 14#	15.35988*	2.17504	0	8.0541	22.6657
		proPUB25::PUB25 43#	1.74366	4.3484	0.998	-12.8623	16.3496				proPUB25::PUB25 43#	13.01634*	2.17504	0.001	5.7105	20.3221
		proPUB26::PUB26 9#	-0.54114	4.3484	1	-15.1471	14.0648				proPUB26::PUB26 9#	14.32955*	2.17504	0	7.0237	21.6353
		proPUB26::PUB26 11#	-0.62272	4.3484	1	-15.2286	13.9832				proPUB26::PUB26 11#	12.31638*	2.17504	0.001	5.0106	19.6222
	proPUB25::PUB25 14#	Col-0	1.24042	4.3484	1	-13.3655	15.8463			proPUB25::PUB25 14#	Col-0	-5.30419	2.17504	0.217	-12.61	2.0016
		pub25 pub26	1.28407	4.3484	1	-13.3219	15.89				pub25 pub26	-15.35988*	2.17504	0	-22.6657	-8.0541
		proPUB25::PUB25 43#	3.02772	4.3484	0.979	-11.5782	17.6336				proPUB25::PUB25 43#	-2.34354	2.17504	0.881	-9.6493	4.9623
		proPUB26::PUB26 9#	0.74292	4.3484	1	-13.863	15.3488				proPUB26::PUB26 9#	-1.03034	2.17504	0.996	-8.3361	6.2755
		proPUB26::PUB26 11#	0.66135	4.3484	1	-13.9446	15.2673				proPUB26::PUB26 11#	-3.0435	2.17504	0.727	-10.3493	4.2623
	proPUB25::PUB25 43#	Col-0	-1.78731	4.3484	0.998	-16.3932	12.8186			proPUB25::PUB25 43#	Col-0	-2.96065	2.17504	0.748	-10.2664	4.3451
		pub25 pub26	-1.74366	4.3484	0.998	-16.3496	12.8623				pub25 pub26	-13.01634*	2.17504	0.001	-20.3221	-5.7105
		proPUB25::PUB25 14#	-3.02772	4.3484	0.979	-17.6336	11.5782				proPUB25::PUB25 14#	2.34354	2.17504	0.881	-4.9623	9.6493
		proPUB26::PUB26 9#	-2.2848	4.3484	0.994	-16.8907	12.3211				proPUB26::PUB26 9#	1.31321	2.17504	0.989	-5.9926	8.619
		proPUB26::PUB26 11#	-2.36637	4.3484	0.993	-16.9723	12.2396				proPUB26::PUB26 11#	-0.69996	2.17504	0.999	-8.0058	6.6058
	proPUB26::PUB26 9#	Col-0	0.49749	4.3484	1	-14.1084	15.1034			proPUB26::PUB26 9#	Col-0	-4.27386	2.17504	0.413	-11.5797	3.0319
		pub25 pub26	0.54114	4.3484	1	-14.0648	15.1471				pub25 pub26	-14.32955*	2.17504	0	-21.6353	-7.0237
		proPUB25::PUB25 14#	-0.74292	4.3484	1	-15.3488	13.863				proPUB25::PUB25 14#	1.03034	2.17504	0.996	-6.2755	8.3361
		proPUB25::PUB25 43#	2.2848	4.3484	0.994	-12.3211	16.8907				proPUB25::PUB25 43#	-1.31321	2.17504	0.989	-8.619	5.9926
		proPUB26::PUB26 11#	-0.08157	4.3484	1	-14.6875	14.5244				proPUB26::PUB26 11#	-2.01316	2.17504	0.932	-9.319	5.2926
	proPUB26::PUB26 11#	Col-0	0.57907	4.3484	1	-14.0269	15.185			proPUB26::PUB26 11#	Col-0	-2.26069	2.17504	0.896	-9.5665	5.0451
		pub25 pub26	0.62272	4.3484	1	-13.9832	15.2286				pub25 pub26	-12.31638*	2.17504	0.001	-19.6222	-5.0106
		proPUB25::PUB25 14#	-0.66135	4.3484	1	-15.2673	13.9446				proPUB25::PUB25 14#	3.0435	2.17504	0.727	-4.2623	10.3493
		proPUB25::PUB25 43#	2.36637	4.3484	0.993	-12.2396	16.9723				proPUB25::PUB25 43#	0.69996	2.17504	0.999	-6.6058	8.0058
		proPUB26::PUB26 9#	0.08157	4.3484	1	-14.5244	14.6875				proPUB26::PUB26 9#	2.01316	2.17504	0.932	-5.2926	9.319
										* The mean difference is significant at the 0.05 level.
	Fig.S1h									Fig.S1i
	PUB25-OX									PUB26-OX
		R1	R2	R3	Mean	SD	t test p value				R1	R2	R3	Mean	SD	t test p value
	Col-0	1.27669	1.14142	0.68623	1.03478	0.309337				Col-0	0.836765	1.14435	1.04433	1.00848	0.156893
	PUB25-OX #1	179.959	209.778	168.932	186.223	21.1308	0.000109861	***		PUB26-OX #1	224.565	247.422	302.097	258.028	39.839	0.000365133	***
	PUB25-OX #37	202.441	226.533	220.789	216.588	12.5834	7.69341e-06	***		PUB26-OX #2	1000.38	1009.57	1008.39	1006.11	4.99637	4.07861e-10	***
	PUB25-OX #44	200.757	198.958	189.499	196.405	6.04795	6.14124e-07	***		PUB26-OX #15	23.5365	26.5252	27.8451	25.9689	2.20752	4.04901e-05	***

## Sheet: Fig.S2
	Fig.S2b
		Col-0			atg5-1			atg7-3			pub25 pub26			pub25 pub26 atg5-1			pub25 pub26 atg7-3
		R1	R2	R3	R1	R2	R3	R1	R2	R3	R1	R2	R3	R1	R2	R3	R1	R2	R3
	+N	1.39355	1.23881	1.18645	1.36577	1.22308	1.28842	1.31479	1.27267	1.2268	1.34661	1.16704	1.3123	1.3128	1.25477	1.31405	1.26018	1.3677	1.30905
	-N	0.261325	0.22348	0.251111	0.0867725	0.066479	0.050121	0.0988259	0.0442379	0.07763	0.505742	0.373747	0.421983	0.065249	0.0515764	0.057833	0.0740051	0.0548382	0.060778
	+N								-N
	Tukey HSD								Tukey HSD
	(I) VAR00001	(J) VAR00001	Mean Difference (I-J)	Std. Error	Sig.	95% Confidence Interval			(I) VAR00001	(J) VAR00001	Mean Difference (I-J)	Std. Error	Sig.	95% Confidence Interval
						Lower Bound	Upper Bound							Lower Bound	Upper Bound
	Col-0	atg5-1	-0.01949	0.05941	0.999	-0.2191	0.1801		Col-0	atg5-1	.17751*	0.026	0	0.0902	0.2648
		atg7-3	0.00151	0.05941	1	-0.198	0.2011			atg7-3	.17174*	0.026	0	0.0844	0.2591
		pub25 pub26	-0.00238	0.05941	1	-0.2019	0.1972			pub25 pub26	-.18852*	0.026	0	-0.2758	-0.1012
		pub25 pub26 atg5-1	-0.02094	0.05941	0.999	-0.2205	0.1786			pub25 pub26 atg5-1	.18709*	0.026	0	0.0998	0.2744
		pub25 pub26 atg7-3	-0.03937	0.05941	0.983	-0.2389	0.1602			pub25 pub26 atg7-3	.18210*	0.026	0	0.0948	0.2694
	atg5-1	Col-0	0.01949	0.05941	0.999	-0.1801	0.2191		atg5-1	Col-0	-.17751*	0.026	0	-0.2648	-0.0902
		atg7-3	0.021	0.05941	0.999	-0.1786	0.2206			atg7-3	-0.00577	0.026	1	-0.0931	0.0815
		pub25 pub26	0.01711	0.05941	1	-0.1825	0.2167			pub25 pub26	-.36603*	0.026	0	-0.4533	-0.2787
		pub25 pub26 atg5-1	-0.00145	0.05941	1	-0.201	0.1981			pub25 pub26 atg5-1	0.00957	0.026	0.999	-0.0777	0.0969
		pub25 pub26 atg7-3	-0.01988	0.05941	0.999	-0.2194	0.1797			pub25 pub26 atg7-3	0.00458	0.026	1	-0.0827	0.0919
	atg7-3	Col-0	-0.00151	0.05941	1	-0.2011	0.198		atg7-3	Col-0	-.17174*	0.026	0	-0.2591	-0.0844
		atg5-1	-0.021	0.05941	0.999	-0.2206	0.1786			atg5-1	0.00577	0.026	1	-0.0815	0.0931
		pub25 pub26	-0.0039	0.05941	1	-0.2035	0.1957			pub25 pub26	-.36026*	0.026	0	-0.4476	-0.2729
		pub25 pub26 atg5-1	-0.02245	0.05941	0.999	-0.222	0.1771			pub25 pub26 atg5-1	0.01535	0.026	0.99	-0.072	0.1027
		pub25 pub26 atg7-3	-0.04089	0.05941	0.98	-0.2404	0.1587			pub25 pub26 atg7-3	0.01036	0.026	0.998	-0.077	0.0977
	pub25 pub26	Col-0	0.00238	0.05941	1	-0.1972	0.2019		pub25 pub26	Col-0	.18852*	0.026	0	0.1012	0.2758
		atg5-1	-0.01711	0.05941	1	-0.2167	0.1825			atg5-1	.36603*	0.026	0	0.2787	0.4533
		atg7-3	0.0039	0.05941	1	-0.1957	0.2035			atg7-3	.36026*	0.026	0	0.2729	0.4476
		pub25 pub26 atg5-1	-0.01856	0.05941	0.999	-0.2181	0.181			pub25 pub26 atg5-1	.37560*	0.026	0	0.2883	0.4629
		pub25 pub26 atg7-3	-0.03699	0.05941	0.987	-0.2366	0.1626			pub25 pub26 atg7-3	.37062*	0.026	0	0.2833	0.4579
	pub25 pub26 atg5-1	Col-0	0.02094	0.05941	0.999	-0.1786	0.2205		pub25 pub26 atg5-1	Col-0	-.18709*	0.026	0	-0.2744	-0.0998
		atg5-1	0.00145	0.05941	1	-0.1981	0.201			atg5-1	-0.00957	0.026	0.999	-0.0969	0.0777
		atg7-3	0.02245	0.05941	0.999	-0.1771	0.222			atg7-3	-0.01535	0.026	0.99	-0.1027	0.072
		pub25 pub26	0.01856	0.05941	0.999	-0.181	0.2181			pub25 pub26	-.37560*	0.026	0	-0.4629	-0.2883
		pub25 pub26 atg7-3	-0.01843	0.05941	1	-0.218	0.1811			pub25 pub26 atg7-3	-0.00499	0.026	1	-0.0923	0.0823
	pub25 pub26 atg7-3	Col-0	0.03937	0.05941	0.983	-0.1602	0.2389		pub25 pub26 atg7-3	Col-0	-.18210*	0.026	0	-0.2694	-0.0948
		atg5-1	0.01988	0.05941	0.999	-0.1797	0.2194			atg5-1	-0.00458	0.026	1	-0.0919	0.0827
		atg7-3	0.04089	0.05941	0.98	-0.1587	0.2404			atg7-3	-0.01036	0.026	0.998	-0.0977	0.077
		pub25 pub26	0.03699	0.05941	0.987	-0.1626	0.2366			pub25 pub26	-.37062*	0.026	0	-0.4579	-0.2833
		pub25 pub26 atg5-1	0.01843	0.05941	1	-0.1811	0.218			pub25 pub26 atg5-1	0.00499	0.026	1	-0.0823	0.0923
									* The mean difference is significant at the 0.05 level.
	Fig.S2d
		Col-0			atg5-1			atg7-3			pub25 pub26			pub25 pub26 atg5-1			pub25 pub26 atg7-3
		R1	R2	R3	R1	R2	R3	R1	R2	R3	R1	R2	R3	R1	R2	R3	R1	R2	R3
	+N	100.003	100	99.4399	98.8898	91.2653	101.185	95.4997	94.2302	98.9255	94.1904	101.727	103.785	97.1626	98.2007	106.81	96.4693	98.9255	91.9809
	-N	61.5824	54.549	58.5743	30.1237	26.3465	26.3985	34.0327	30.7691	29.2367	66.071	73.3207	69.9404	31.5918	30.7947	30.0181	26.357	32.3894	25.0025
	+N								-N
	Tukey HSD								Tukey HSD
	(I) VAR00001	(J) VAR00001	Mean Difference (I-J)	Std. Error	Sig.	95% Confidence Interval			(I) VAR00001	(J) VAR00001	Mean Difference (I-J)	Std. Error	Sig.	95% Confidence Interval
						Lower Bound	Upper Bound							Lower Bound	Upper Bound
	Col-0	atg5-1	2.70069	3.31553	0.959	-8.4359	13.8373		Col-0	atg5-1	30.61234*	2.41267	0	22.5084	38.7163
		atg7-3	3.59574	3.31553	0.878	-7.5409	14.7324			atg7-3	26.88908*	2.41267	0	18.7851	34.9931
		pub25 pub26	-0.08644	3.31553	1	-11.2231	11.0502			pub25 pub26	-11.54211*	2.41267	0.005	-19.6461	-3.4381
		pub25 pub26 atg5-1	-0.91029	3.31553	1	-12.0469	10.2263			pub25 pub26 atg5-1	27.43372*	2.41267	0	19.3297	35.5377
		pub25 pub26 atg7-3	4.02233	3.31553	0.823	-7.1143	15.1589			pub25 pub26 atg7-3	30.31893*	2.41267	0	22.215	38.4229
	atg5-1	Col-0	-2.70069	3.31553	0.959	-13.8373	8.4359		atg5-1	Col-0	-30.61234*	2.41267	0	-38.7163	-22.5084
		atg7-3	0.89505	3.31553	1	-10.2416	12.0317			atg7-3	-3.72325	2.41267	0.646	-11.8272	4.3807
		pub25 pub26	-2.78713	3.31553	0.954	-13.9237	8.3495			pub25 pub26	-42.15445*	2.41267	0	-50.2584	-34.0505
		pub25 pub26 atg5-1	-3.61098	3.31553	0.877	-14.7476	7.5256			pub25 pub26 atg5-1	-3.17862	2.41267	0.771	-11.2826	4.9254
		pub25 pub26 atg7-3	1.32163	3.31553	0.998	-9.815	12.4583			pub25 pub26 atg7-3	-0.29341	2.41267	1	-8.3974	7.8106
	atg7-3	Col-0	-3.59574	3.31553	0.878	-14.7324	7.5409		atg7-3	Col-0	-26.88908*	2.41267	0	-34.9931	-18.7851
		atg5-1	-0.89505	3.31553	1	-12.0317	10.2416			atg5-1	3.72325	2.41267	0.646	-4.3807	11.8272
		pub25 pub26	-3.68218	3.31553	0.868	-14.8188	7.4544			pub25 pub26	-38.43119*	2.41267	0	-46.5352	-30.3272
		pub25 pub26 atg5-1	-4.50603	3.31553	0.749	-15.6426	6.6306			pub25 pub26 atg5-1	0.54464	2.41267	1	-7.5593	8.6486
		pub25 pub26 atg7-3	0.42658	3.31553	1	-10.71	11.5632			pub25 pub26 atg7-3	3.42985	2.41267	0.715	-4.6741	11.5338
	pub25 pub26	Col-0	0.08644	3.31553	1	-11.0502	11.2231		pub25 pub26	Col-0	11.54211*	2.41267	0.005	3.4381	19.6461
		atg5-1	2.78713	3.31553	0.954	-8.3495	13.9237			atg5-1	42.15445*	2.41267	0	34.0505	50.2584
		atg7-3	3.68218	3.31553	0.868	-7.4544	14.8188			atg7-3	38.43119*	2.41267	0	30.3272	46.5352
		pub25 pub26 atg5-1	-0.82385	3.31553	1	-11.9605	10.3128			pub25 pub26 atg5-1	38.97583*	2.41267	0	30.8719	47.0798
		pub25 pub26 atg7-3	4.10876	3.31553	0.81	-7.0279	15.2454			pub25 pub26 atg7-3	41.86104*	2.41267	0	33.7571	49.965
	pub25 pub26 atg5-1	Col-0	0.91029	3.31553	1	-10.2263	12.0469		pub25 pub26 atg5-1	Col-0	-27.43372*	2.41267	0	-35.5377	-19.3297
		atg5-1	3.61098	3.31553	0.877	-7.5256	14.7476			atg5-1	3.17862	2.41267	0.771	-4.9254	11.2826
		atg7-3	4.50603	3.31553	0.749	-6.6306	15.6426			atg7-3	-0.54464	2.41267	1	-8.6486	7.5593
		pub25 pub26	0.82385	3.31553	1	-10.3128	11.9605			pub25 pub26	-38.97583*	2.41267	0	-47.0798	-30.8719
		pub25 pub26 atg7-3	4.93261	3.31553	0.678	-6.204	16.0692			pub25 pub26 atg7-3	2.88521	2.41267	0.831	-5.2188	10.9892
	pub25 pub26 atg7-3	Col-0	-4.02233	3.31553	0.823	-15.1589	7.1143		pub25 pub26 atg7-3	Col-0	-30.31893*	2.41267	0	-38.4229	-22.215
		atg5-1	-1.32163	3.31553	0.998	-12.4583	9.815			atg5-1	0.29341	2.41267	1	-7.8106	8.3974
		atg7-3	-0.42658	3.31553	1	-11.5632	10.71			atg7-3	-3.42985	2.41267	0.715	-11.5338	4.6741
		pub25 pub26	-4.10876	3.31553	0.81	-15.2454	7.0279			pub25 pub26	-41.86104*	2.41267	0	-49.965	-33.7571
		pub25 pub26 atg5-1	-4.93261	3.31553	0.678	-16.0692	6.204			pub25 pub26 atg5-1	-2.88521	2.41267	0.831	-10.9892	5.2188
									* The mean difference is significant at the 0.05 level.

## Sheet: Fig.S3
	Fig.S3c
		Col-0			atg1abct			atg13ab			pub25			pub26			pub25 pub26
	-C	R1	R2	R3	R1	R2	R3	R1	R2	R3	R1	R2	R3	R1	R2	R3	R1	R2	R3
		1.83001	1.61808	1.78144	0.233844	0.238424	0.200938	0.34076	0.303894	0.353054	1.79934	1.59307	1.79343	1.71548	1.78433	1.80416	0.19059	0.238847	0.25771
	Multiple Comparisons
	Dependent Variable:	VAR00002
	Tukey HSD
	(I) VAR00001	(J) VAR00001	Mean Difference (I-J)	Std. Error	Sig.	95% Confidence Interval
						Lower Bound	Upper Bound
	Col-0	atg1abct	1.51878*	0.0582638	7.65592e-11	1.32307	1.71448
		atg13ab	1.41061*	0.0582638	1.81266e-10	1.2149	1.60631
		pub25	0.014561	0.0582638	0.999828	-0.181142	0.210264
		pub26	-0.024814	0.0582638	0.997738	-0.220517	0.170889
		pub25 pub26	1.51413*	0.0582638	7.93334e-11	1.31842	1.70983
	atg1abct	Col-0	-1.51878*	0.0582638	7.65592e-11	-1.71448	-1.32307
		atg13ab	-0.108167	0.0582638	0.469369	-0.303871	0.087536
		pub25	-1.50421*	0.0582638	8.56285e-11	-1.69992	-1.30851
		pub26	-1.54359*	0.0582638	6.3383e-11	-1.73929	-1.34789
		pub25 pub26	-0.004647	0.0582638	0.999999	-0.20035	0.191056
	atg13ab	Col-0	-1.41061*	0.0582638	1.81266e-10	-1.60631	-1.2149
		atg1abct	0.108167	0.0582638	0.469369	-0.087536	0.303871
		pub25	-1.39605*	0.0582638	2.04671e-10	-1.59175	-1.20034
		pub26	-1.43542*	0.0582638	1.47813e-10	-1.63113	-1.23972
		pub25 pub26	0.10352	0.0582638	0.512969	-0.092183	0.299224
	pub25	Col-0	-0.014561	0.0582638	0.999828	-0.210264	0.181142
		atg1abct	1.50421*	0.0582638	8.56285e-11	1.30851	1.69992
		atg13ab	1.39605*	0.0582638	2.04671e-10	1.20034	1.59175
		pub26	-0.039375	0.0582638	0.981436	-0.235078	0.156328
		pub25 pub26	1.49957*	0.0582638	8.87671e-11	1.30386	1.69527
	pub26	Col-0	0.024814	0.0582638	0.997738	-0.170889	0.220517
		atg1abct	1.54359*	0.0582638	6.3383e-11	1.34789	1.73929
		atg13ab	1.43542*	0.0582638	1.47813e-10	1.23972	1.63113
		pub25	0.039375	0.0582638	0.981436	-0.156328	0.235078
		pub25 pub26	1.53894*	0.0582638	6.56544e-11	1.34324	1.73465
	pub25 pub26	Col-0	-1.51413*	0.0582638	7.93334e-11	-1.70983	-1.31842
		atg1abct	0.004647	0.0582638	0.999999	-0.191056	0.20035
		atg13ab	-0.10352	0.0582638	0.512969	-0.299224	0.092183
		pub25	-1.49957*	0.0582638	8.87671e-11	-1.69527	-1.30386
		pub26	-1.53894*	0.0582638	6.56544e-11	-1.73465	-1.34324
	*. The mean difference is significant at the 0.05 level.
	Fig.S3d
		Col-0			atg13ab			pub25 pub26			PUB25-OX 1#			PUB25-OX 37#			PUB25-OX 44#
	-C	R1	R2	R3	R1	R2	R3	R1	R2	R3	R1	R2	R3	R1	R2	R3	R1	R2	R3
		1.17663	1.29851	1.18742	0.698939	0.586946	0.740139	0.826888	0.809117	0.847077	2.53667	2.73782	2.15693	2.14088	2.09418	2.18148	2.44908	2.15613	2.36866
	Multiple Comparisons
	Dependent Variable:	VAR00002
	Tukey HSD
	(I) VAR00001	(J) VAR00001	Mean Difference (I-J)	Std. Error	Sig.	95% Confidence Interval
						Lower Bound	Upper Bound
	Col-0	atg13ab	.54551*	0.11692	0.00557958	0.152783	0.938235
		pub25 26	.39316*	0.11692	0.0496926	0.000430589	0.785882
		PUB25-OX 1#	-1.25629*	0.11692	1.93793e-06	-1.64902	-0.863564
		PUB25-OX 37#	-.91800*	0.11692	5.22313e-05	-1.31072	-0.525271
		PUB25-OX 44#	-1.10377*	0.11692	7.78006e-06	-1.4965	-0.711045
	atg13ab	Col-0	-.54551*	0.11692	0.00557958	-0.938235	-0.152783
		pub25 pub26	-0.152353	0.11692	0.778338	-0.545078	0.240373
		PUB25-OX 1#	-1.80180*	0.11692	3.43341e-08	-2.19452	-1.40907
		PUB25-OX 37#	-1.46351*	0.11692	3.60061e-07	-1.85623	-1.07078
		PUB25-OX 44#	-1.64928*	0.11692	9.39343e-08	-2.04201	-1.25655
	pub25 pub26	Col-0	-.39316*	0.11692	0.0496926	-0.785882	-0.000430589
		atg13ab	0.152353	0.11692	0.778338	-0.240373	0.545078
		PUB25-OX 1#	-1.64945*	0.11692	9.38273e-08	-2.04217	-1.25672
		PUB25-OX 37#	-1.31115*	0.11692	1.21495e-06	-1.70388	-0.918427
		PUB25-OX 44#	-1.49693*	0.11692	2.79773e-07	-1.88965	-1.1042
	PUB25-OX 1#	Col-0	1.25629*	0.11692	1.93793e-06	0.863564	1.64902
		atg13ab	1.80180*	0.11692	3.43341e-08	1.40907	2.19452
		pub25 pub26	1.64945*	0.11692	9.38273e-08	1.25672	2.04217
		PUB25-OX 37#	0.338293	0.11692	0.107614	-0.0544327	0.731019
		PUB25-OX 44#	0.152519	0.11692	0.777608	-0.240207	0.545244
	PUB25-OX 37#	Col-0	.91800*	0.11692	5.22313e-05	0.525271	1.31072
		atg13ab	1.46351*	0.11692	3.60061e-07	1.07078	1.85623
		pub25 pub26	1.31115*	0.11692	1.21495e-06	0.918427	1.70388
		PUB25-OX 1#	-0.338293	0.11692	0.107614	-0.731019	0.0544327
		PUB25-OX 44#	-0.185774	0.11692	0.619824	-0.5785	0.206951
	PUB25-OX 44#	Col-0	1.10377*	0.11692	7.78006e-06	0.711045	1.4965
		atg13ab	1.64928*	0.11692	9.39343e-08	1.25655	2.04201
		pub25 pub26	1.49693*	0.11692	2.79773e-07	1.1042	1.88965
		PUB25-OX 1#	-0.152519	0.11692	0.777608	-0.545244	0.240207
		PUB25-OX 37#	0.185774	0.11692	0.619824	-0.206951	0.5785
	*. The mean difference is significant at the 0.05 level.
	Fig.S3e
		Col-0			atg13ab			pub25 pub26			PUB26-OX 1#			PUB26-OX 2#			PUB26-OX 15#
	-C	R1	R2	R3	R1	R2	R3	R1	R2	R3	R1	R2	R3	R1	R2	R3	R1	R2	R3
		0.846241	0.859682	0.914675	0.486222	0.587489	0.579714	0.514519	0.592538	0.578513	1.53577	1.66187	1.74324	1.76631	1.68084	1.86728	1.97364	2.19969	1.98208
	Multiple Comparisons
	Dependent Variable:	VAR00002
	Tukey HSD
	(I) VAR00001	(J) VAR00001	Mean Difference (I-J)	Std. Error	Sig.	95% Confidence Interval
						Lower Bound	Upper Bound
	Col-0	atg13ab	.32239*	0.0685396	0.00524107	0.0921719	0.55261
		pub25 26	.31168*	0.0685396	0.00678256	0.081457	0.541895
		PUB26-OX 1#	-.77343*	0.0685396	1.13443e-06	-1.00365	-0.543209
		PUB26-OX 2#	-.89794*	0.0685396	2.16164e-07	-1.12816	-0.667722
		PUB26-OX 15#	-1.17827*	0.0685396	9.77957e-09	-1.40849	-0.948052
	atg13ab	Col-0	-.32239*	0.0685396	0.00524107	-0.55261	-0.0921719
		pub25 26	-0.0107149	0.0685396	0.999983	-0.240934	0.219504
		PUB26-OX 1#	-1.09582*	0.0685396	2.25297e-08	-1.32604	-0.8656
		PUB26-OX 2#	-1.22033*	0.0685396	6.52154e-09	-1.45055	-0.990113
		PUB26-OX 15#	-1.50066*	0.0685396	5.87792e-10	-1.73088	-1.27044
	pub25 26	Col-0	-.31168*	0.0685396	0.00678256	-0.541895	-0.081457
		atg13ab	0.0107149	0.0685396	0.999983	-0.219504	0.240934
		PUB26-OX 1#	-1.08510*	0.0685396	2.5216e-08	-1.31532	-0.854885
		PUB26-OX 2#	-1.20962*	0.0685396	7.22167e-09	-1.43984	-0.979398
		PUB26-OX 15#	-1.48995*	0.0685396	6.39152e-10	-1.72017	-1.25973
	PUB26-OX 1#	Col-0	.77343*	0.0685396	1.13443e-06	0.543209	1.00365
		atg13ab	1.09582*	0.0685396	2.25297e-08	0.8656	1.32604
		pub25 26	1.08510*	0.0685396	2.5216e-08	0.854885	1.31532
		PUB26-OX 2#	-0.124513	0.0685396	0.490967	-0.354732	0.105706
		PUB26-OX 15#	-.40484*	0.0685396	0.000784215	-0.635062	-0.174624
	PUB26-OX 2#	Col-0	.89794*	0.0685396	2.16164e-07	0.667722	1.12816
		atg13ab	1.22033*	0.0685396	6.52154e-09	0.990113	1.45055
		pub25 26	1.20962*	0.0685396	7.22167e-09	0.979398	1.43984
		PUB26-OX 1#	0.124513	0.0685396	0.490967	-0.105706	0.354732
		PUB26-OX 15#	-.28033*	0.0685396	0.0145677	-0.510549	-0.050111
	PUB26-OX 15#	Col-0	1.17827*	0.0685396	9.77957e-09	0.948052	1.40849
		atg13ab	1.50066*	0.0685396	5.87792e-10	1.27044	1.73088
		pub25 26	1.48995*	0.0685396	6.39152e-10	1.25973	1.72017
		PUB26-OX 1#	.40484*	0.0685396	0.000784215	0.174624	0.635062
		PUB26-OX 2#	.28033*	0.0685396	0.0145677	0.050111	0.510549
	*. The mean difference is significant at the 0.05 level.
	Fig.S3g
	Col-0	R1	3.52989		Multiple Comparisons
		R2	3.89552		Dependent Variable:	VAR00002
		R3	3.16225		Tukey HSD
	atg1abct	R1	1.09682		(I) VAR00001	(J) VAR00001	Mean Difference (I-J)	Std. Error	Sig.	95% Confidence Interval
		R2	0.760838							Lower Bound	Upper Bound
		R3	1.22042		Col-0	atg1abct	2.50319*	0.563493	0.00740565	0.488813	4.51757
	pub25	R1	3.06603			pub25	0.123835	0.563493	1	-1.89055	2.13822
		R2	3.54795			pub26	0.139116	0.563493	1	-1.87526	2.1535
		R3	3.60217			pub25 pub26	2.17947*	0.563493	0.0267223	0.165089	4.19385
	pub26	R1	3.29044			PUB25-OX 1#	-3.90220*	0.563493	2.65612e-05	-5.91658	-1.88782
		R2	3.56593			PUB25-OX 37#	-2.88732*	0.563493	0.00154796	-4.9017	-0.872943
		R3	3.31394			PUB25-OX 44#	-3.44465*	0.563493	0.000161057	-5.45903	-1.43027
	pub25 pub26	R1	1.48066			PUB26-OX 1#	-3.20041*	0.563493	0.000431506	-5.21479	-1.18603
		R2	1.32735			PUB26-OX 2#	-3.99315*	0.563493	1.87173e-05	-6.00753	-1.97877
		R3	1.24123			PUB26-OX 15#	-3.40718*	0.563493	0.00018718	-5.42156	-1.39279
	PUB25-OX 1#	R1	7.61003		atg1abct	Col-0	-2.50319*	0.563493	0.00740565	-4.51757	-0.488813
		R2	8.21346			pub25	-2.37936*	0.563493	0.0121752	-4.39374	-0.364978
		R3	6.47077			pub26	-2.36408*	0.563493	0.0129397	-4.37846	-0.349698
	PUB25-OX 37#	R1	7.02263			pub25 pub26	-0.323725	0.563493	0.99994	-2.33811	1.69066
		R2	5.68255			PUB25-OX 1#	-6.40540*	0.563493	5.43033e-09	-8.41978	-4.39102
		R3	6.54444			PUB25-OX 37#	-5.39052*	0.563493	1.28234e-07	-7.4049	-3.37614
	PUB25-OX 44#	R1	7.34723			PUB25-OX 44#	-5.94784*	0.563493	2.16012e-08	-7.96222	-3.93346
		R2	6.46838			PUB26-OX 1#	-5.70360*	0.563493	4.64996e-08	-7.71798	-3.68922
		R3	7.10598			PUB26-OX 2#	-6.49634*	0.563493	4.16151e-09	-8.51072	-4.48196
	PUB26-OX 1#	R1	6.7896			PUB26-OX 15#	-5.91037*	0.563493	2.42643e-08	-7.92475	-3.89599
		R2	5.33613		pub25	Col-0	-0.123835	0.563493	1	-2.13822	1.89055
		R3	8.06315			atg1abct	2.37936*	0.563493	0.0121752	0.364978	4.39374
	PUB26-OX 2#	R1	8.82979			pub26	0.0152804	0.563493	1	-1.9991	2.02966
		R2	6.46025			pub25 pub26	2.05563*	0.563493	0.042857	0.0412535	4.07001
		R3	7.27705			PUB25-OX 1#	-4.02604*	0.563493	1.65038e-05	-6.04042	-2.01166
	PUB26-OX 15#	R1	7.36144			PUB25-OX 37#	-3.01116*	0.563493	0.000932927	-5.02554	-0.996778
		R2	6.56175			PUB25-OX 44#	-3.56848*	0.563493	9.82664e-05	-5.58286	-1.5541
		R3	6.88599			PUB26-OX 1#	-3.32425*	0.563493	0.000261372	-5.33863	-1.30987
						PUB26-OX 2#	-4.11698*	0.563493	1.16773e-05	-6.13136	-2.1026
						PUB26-OX 15#	-3.53101*	0.563493	0.000114061	-5.54539	-1.51663
					pub26	Col-0	-0.139116	0.563493	1	-2.1535	1.87526
						atg1abct	2.36408*	0.563493	0.0129397	0.349698	4.37846
						pub25	-0.0152804	0.563493	1	-2.02966	1.9991
						pub25 pub26	2.04035*	0.563493	0.0453846	0.0259731	4.05473
						PUB25-OX 1#	-4.04132*	0.563493	1.55685e-05	-6.0557	-2.02694
						PUB25-OX 37#	-3.02644*	0.563493	0.000876479	-5.04082	-1.01206
						PUB25-OX 44#	-3.58376*	0.563493	9.24822e-05	-5.59814	-1.56938
						PUB26-OX 1#	-3.33953*	0.563493	0.000245748	-5.35391	-1.32515
						PUB26-OX 2#	-4.13226*	0.563493	1.10212e-05	-6.14664	-2.11788
						PUB26-OX 15#	-3.54629*	0.563493	0.00010733	-5.56067	-1.53191
					pub25 pub26	Col-0	-2.17947*	0.563493	0.0267223	-4.19385	-0.165089
						atg1abct	0.323725	0.563493	0.99994	-1.69066	2.33811
						pub25	-2.05563*	0.563493	0.042857	-4.07001	-0.0412535
						pub26	-2.04035*	0.563493	0.0453846	-4.05473	-0.0259731
						PUB25-OX 1#	-6.08167*	0.563493	1.43181e-08	-8.09605	-4.06729
						PUB25-OX 37#	-5.06679*	0.563493	3.80431e-07	-7.08117	-3.05241
						PUB25-OX 44#	-5.62412*	0.563493	5.99544e-08	-7.6385	-3.60973
						PUB26-OX 1#	-5.37988*	0.563493	1.32815e-07	-7.39426	-3.3655
						PUB26-OX 2#	-6.17261*	0.563493	1.08656e-08	-8.18699	-4.15823
						PUB26-OX 15#	-5.58664*	0.563493	6.7639e-08	-7.60102	-3.57226
					PUB25-OX 1#	Col-0	3.90220*	0.563493	2.65612e-05	1.88782	5.91658
						atg1abct	6.40540*	0.563493	5.43033e-09	4.39102	8.41978
						pub25	4.02604*	0.563493	1.65038e-05	2.01166	6.04042
						pub26	4.04132*	0.563493	1.55685e-05	2.02694	6.0557
						pub25 pub26	6.08167*	0.563493	1.43181e-08	4.06729	8.09605
						PUB25-OX 37#	1.01488	0.563493	0.767731	-0.999501	3.02926
						PUB25-OX 44#	0.457556	0.563493	0.998759	-1.55682	2.47194
						PUB26-OX 1#	0.701792	0.563493	0.96901	-1.31259	2.71617
						PUB26-OX 2#	-0.0909432	0.563493	1	-2.10532	1.92344
						PUB26-OX 15#	0.495027	0.563493	0.997635	-1.51935	2.50941
					PUB25-OX 37#	Col-0	2.88732*	0.563493	0.00154796	0.872943	4.9017
						atg1abct	5.39052*	0.563493	1.28234e-07	3.37614	7.4049
						pub25	3.01116*	0.563493	0.000932927	0.996778	5.02554
						pub26	3.02644*	0.563493	0.000876479	1.01206	5.04082
						pub25 pub26	5.06679*	0.563493	3.80431e-07	3.05241	7.08117
						PUB25-OX 1#	-1.01488	0.563493	0.767731	-3.02926	0.999501
						PUB25-OX 44#	-0.557323	0.563493	0.993998	-2.5717	1.45706
						PUB26-OX 1#	-0.313087	0.563493	0.999956	-2.32747	1.70129
						PUB26-OX 2#	-1.10582	0.563493	0.673829	-3.1202	0.908558
						PUB26-OX 15#	-0.519852	0.563493	0.996505	-2.53423	1.49453
					PUB25-OX 44#	Col-0	3.44465*	0.563493	0.000161057	1.43027	5.45903
						atg1abct	5.94784*	0.563493	2.16012e-08	3.93346	7.96222
						pub25	3.56848*	0.563493	9.82664e-05	1.5541	5.58286
						pub26	3.58376*	0.563493	9.24822e-05	1.56938	5.59814
						pub25 pub26	5.62412*	0.563493	5.99544e-08	3.60973	7.6385
						PUB25-OX 1#	-0.457556	0.563493	0.998759	-2.47194	1.55682
						PUB25-OX 37#	0.557323	0.563493	0.993998	-1.45706	2.5717
						PUB26-OX 1#	0.244236	0.563493	0.999996	-1.77014	2.25862
						PUB26-OX 2#	-0.548499	0.563493	0.994689	-2.56288	1.46588
						PUB26-OX 15#	0.0374713	0.563493	1	-1.97691	2.05185
					PUB26-OX 1#	Col-0	3.20041*	0.563493	0.000431506	1.18603	5.21479
						atg1abct	5.70360*	0.563493	4.64996e-08	3.68922	7.71798
						pub25	3.32425*	0.563493	0.000261372	1.30987	5.33863
						pub26	3.33953*	0.563493	0.000245748	1.32515	5.35391
						pub25 pub26	5.37988*	0.563493	1.32815e-07	3.3655	7.39426
						PUB25-OX 1#	-0.701792	0.563493	0.96901	-2.71617	1.31259
						PUB25-OX 37#	0.313087	0.563493	0.999956	-1.70129	2.32747
						PUB25-OX 44#	-0.244236	0.563493	0.999996	-2.25862	1.77014
						PUB26-OX 2#	-0.792735	0.563493	0.933849	-2.80712	1.22165
						PUB26-OX 15#	-0.206765	0.563493	0.999999	-2.22115	1.80762
					PUB26-OX 2#	Col-0	3.99315*	0.563493	1.87173e-05	1.97877	6.00753
						atg1abct	6.49634*	0.563493	4.16151e-09	4.48196	8.51072
						pub25	4.11698*	0.563493	1.16773e-05	2.1026	6.13136
						pub26	4.13226*	0.563493	1.10212e-05	2.11788	6.14664
						pub25 pub26	6.17261*	0.563493	1.08656e-08	4.15823	8.18699
						PUB25-OX 1#	0.0909432	0.563493	1	-1.92344	2.10532
						PUB25-OX 37#	1.10582	0.563493	0.673829	-0.908558	3.1202
						PUB25-OX 44#	0.548499	0.563493	0.994689	-1.46588	2.56288
						PUB26-OX 1#	0.792735	0.563493	0.933849	-1.22165	2.80712
						PUB26-OX 15#	0.58597	0.563493	0.991246	-1.42841	2.60035
					PUB26-OX 15#	Col-0	3.40718*	0.563493	0.00018718	1.39279	5.42156
						atg1abct	5.91037*	0.563493	2.42643e-08	3.89599	7.92475
						pub25	3.53101*	0.563493	0.000114061	1.51663	5.54539
						pub26	3.54629*	0.563493	0.00010733	1.53191	5.56067
						pub25 pub26	5.58664*	0.563493	6.7639e-08	3.57226	7.60102
						PUB25-OX 1#	-0.495027	0.563493	0.997635	-2.50941	1.51935
						PUB25-OX 37#	0.519852	0.563493	0.996505	-1.49453	2.53423
						PUB25-OX 44#	-0.0374713	0.563493	1	-2.05185	1.97691
						PUB26-OX 1#	0.206765	0.563493	0.999999	-1.80762	2.22115
						PUB26-OX 2#	-0.58597	0.563493	0.991246	-2.60035	1.42841
					*. The mean difference is significant at the 0.05 level.

## Sheet: Fig.S4
		Fig.S4a
			Col-0					pub25 pub26		pub25 26			pub25 pub26 vs Col-0
			R1	R2	R3	Mean	SD	R1	R2	R3	Mean	SD	t test p value
		0 h	1.00172	1.00096	1.00074	1.00114	0.00051558	1.2612	0.940809	1.09556	1.09919	0.160225	0.348936	ns
		24 h	1.75596	1.55635	1.6889	1.66707	0.101582	1.46496	1.20905	1.28455	1.31952	0.131489	0.0222992	*
		36 h	2.10341	1.75439	1.98925	1.94902	0.177956	1.69326	1.52642	1.65212	1.62394	0.0869218	0.0467252	*
		48 h	2.53326	1.90207	2.27764	2.23766	0.317487	1.61489	1.35247	1.55429	1.50721	0.137397	0.0216344	*
		Fig.S4b
			Col-0					PUB25-OX		pub25 26			PUB25-OX vs. Col-0		PUB26-OX					PUB26-OX vs. Col-0
			R1	R2	R3	Mean	SD	R1	R2	R3	Mean	SD	t test p value		R1	R2	R3	Mean	SD	t test p value
		0 h	1.00008	1.00009	1.00004	1.00007	2.78003e-05	1.1667	1.09974	1.10475	1.12373	0.0372952	0.00455501	**	1.09108	1.04171	1.07454	1.06911	0.0251323	0.00891704	**
		24 h	1.04154	1.06186	1.0733	1.0589	0.0160882	1.32084	1.2755	1.42871	1.34168	0.078707	0.00366075	**	1.63343	1.85684	1.32778	1.60601	0.265592	0.0235553	*
		36 h	1.35121	1.36043	1.47194	1.39453	0.0672005	1.66293	1.63015	1.70299	1.66536	0.03648	0.00357824	**	1.85794	2.17958	2.27504	2.10419	0.218529	0.00578305	**
		48 h	2.31492	2.31431	2.22298	2.28407	0.0529078	2.57841	2.72637	2.8907	2.73183	0.156216	0.00929339	**	2.78856	2.61758	2.83985	2.74867	0.116383	0.00325509	**

## Sheet: Fig.S5
	Fig.S5
	ATG1a
			R1	R2	R3	Mean	SD	t test p value
	Col-0	0 h	0.992573	1.02322	0.984617	1.00014	0.0203844
		12 h	0.844411	0.808077	0.927946	0.860145	0.0614639	0.0200435	*
		24 h	0.915117	1.04696	0.942359	0.968144	0.0695996	0.103172	ns
		36 h	1.18202	1.01145	1.13824	1.11057	0.0885876	0.4874	ns
	pub25 pub26	0 h	0.917773	0.947868	1.01372	0.959786	0.0490689	0.258715	ns
		12 h	0.7331	0.579009	0.837565	0.716558	0.130069	0.0202843	*
		24 h	0.893983	0.975362	0.944803	0.938049	0.0411077	0.0790557	ns
		36 h	1.09001	0.979652	1.0158	1.02849	0.0562625	0.457989	ns
	ATG13a
			R1	R2	R3	Mean	SD	t test p value
	Col-0	0 h	0.862272	0.955846	1.2133	1.01047	0.181778
		12 h	0.914655	0.915369	0.954231	0.928085	0.0226459	0.479493	ns
		24 h	1.18381	1.24521	1.16962	1.19955	0.0401746	0.153371	ns
		36 h	1.15093	1.15254	0.960433	1.08797	0.11045	0.562279	ns
	pub25 pub26	0 h	0.69683	1.00231	0.875245	0.858127	0.153455	0.329532	ns
		12 h	1.0107	0.867165	0.879859	0.919242	0.0794598	0.470335	ns
		24 h	1.03927	0.985738	1.12243	1.04915	0.0688808	0.747759	ns
		36 h	0.943686	1.0199	1.23367	1.06575	0.150334	0.705593	ns
	ATG8a
			R1	R2	R3	Mean	SD	t test p value
	Col-0	0 h	1.13441	0.967897	0.910755	1.00435	0.116198
		12 h	2.23366	2.13583	2.06402	2.1445	0.0851508	0.000164041	***
		24 h	2.4309	2.25511	1.94234	2.20945	0.24746	0.00158054	**
		36 h	1.5203	1.40467	1.5161	1.48036	0.0655778	0.00348464	**
	pub25 pub26	0 h	1.30025	1.28886	1.32521	1.30477	0.018592	0.0114947	*
		12 h	1.82491	2.1967	2.19487	2.07216	0.214126	0.00161496	**
		24 h	2.26765	2.28349	2.56726	2.3728	0.168592	0.000318161	***
		36 h	1.47159	1.19171	1.716	1.45977	0.262344	0.0514191	ns
	ATG8e
			R1	R2	R3	Mean	SD	t test p value
	Col-0	0 h	1.18837	0.992527	0.847828	1.00957	0.170907
		12 h	1.01378	0.946071	0.960342	0.973399	0.0356943	0.737837	ns
		24 h	1.06663	1.02219	1.00123	1.03002	0.0333959	0.848801	ns
		36 h	0.911187	0.973516	0.934348	0.939684	0.0315052	0.52444	ns
	pub25 pub26	0 h	0.945664	0.807319	1.08117	0.944717	0.136927	0.635012	ns
		12 h	1.02842	1.09056	1.18105	1.10001	0.0767495	0.450136	ns
		24 h	1.03365	0.858967	1.02076	0.971127	0.0973471	0.751963	ns
		36 h	0.97534	0.887213	0.920541	0.927698	0.0444971	0.466982	ns
	ATG5
			R1	R2	R3	Mean	SD	t test p value
	Col-0	0 h	1.07126	0.991159	0.941795	1.0014	0.0653362
		12 h	1.38954	1.40387	1.36856	1.38733	0.0177589	0.000590605	***
		24 h	1.98089	2.31191	2.29921	2.19733	0.187558	0.000477472	***
		36 h	4.08562	4.35992	3.7578	4.06778	0.301455	6.67523e-05	***
	pub25 pub26	0 h	1.05106	0.808518	0.909668	0.923081	0.121825	0.381993	ns
		12 h	1.52461	1.16896	1.36879	1.35412	0.178282	0.0323586	*
		24 h	2.30595	2.3004	2.34624	2.31753	0.0250189	5.29007e-06	***
		36 h	3.80396	4.15872	3.94622	3.96963	0.178538	1.11188e-05	***
	ATG7
			R1	R2	R3	Mean	SD	t test p value
	Col-0	0 h	1.03097	0.981907	0.987837	1.00024	0.026777
		12 h	1.82819	1.79005	1.66654	1.76159	0.0844992	0.000118882	***
		24 h	3.106	3.42542	2.96623	3.16588	0.235377	9.29663e-05	***
		36 h	0.745488	0.726186	0.691502	0.721059	0.0273558	0.000226118	***
	pub25 pub26	0 h	0.812766	0.779031	0.8962	0.829332	0.0603156	0.0109427	*
		12 h	1.52064	1.7494	1.63366	1.63457	0.114379	0.000727766	***
		24 h	3.07134	2.98235	2.73084	2.92818	0.176595	4.81893e-05	***
		36 h	0.841366	0.80596	0.863987	0.837104	0.0292473	0.00205072	**

## Sheet: Fig.S8
	Fig.S8a
		Col-0					PUB25-OX		pub25 26			PUB25-OX vs Col-0
		R1	R2	R3	Mean	SD	R1	R2	R3	Mean	SD	t test p value
	0 min	1.00028	1.00038	1.00035	1.00034	5.34634e-05	1.00026	1.00035	1.00027	1.0003	4.58839e-05	0.381098	ns
	5 min	0.562119	0.842502	0.762511	0.722377	0.144436	0.462918	0.62686	0.554104	0.547961	0.0821435	0.14319	ns
	15 min	0.632706	0.738461	0.672141	0.681103	0.053444	0.239007	0.218557	0.318679	0.258748	0.0528997	0.000625198	***
	30 min	0.483006	0.573765	0.444183	0.500318	0.066503	0.184426	0.169227	0.165179	0.172944	0.0101476	0.00108492	**
	60 min	0.369165	0.56761	0.436434	0.457736	0.100923	0.211454	0.191542	0.138458	0.180485	0.0377333	0.011187	*
	Fig.S8b
		Col-0					PUB26-OX		pub25 26			PUB26-OX vs Col-0
		R1	R2	R3	Mean	SD	R1	R2	R3	Mean	SD	t test p value
	0 min	1.00003	1.00007	1.00005	1.00005	2.00083e-05	1.00009	1.00006	1	1.00005	4.47921e-05	0.947095	ns
	5 min	0.818987	0.67242	0.694725	0.728711	0.078973	0.442822	0.412712	0.338419	0.397984	0.0537371	0.0038899	**
	15 min	0.869981	0.725081	0.688081	0.761048	0.0961359	0.199446	0.195429	0.185947	0.193607	0.00693142	0.000521109	***
	30 min	0.757602	0.689951	0.612384	0.686646	0.0726654	0.203765	0.20399	0.22988	0.212545	0.015013	0.000379111	***
	60 min	0.575059	0.597828	0.59722	0.590036	0.0129737	0.204152	0.194196	0.18813	0.195493	0.00808932	1.49832e-06	***
	Fig.S8c
		Col-0					PUB25-OX		pub25 26			PUB25-OX vs Col-0
		R1	R2	R3	Mean	SD	R1	R2	R3	Mean	SD	t test p value
	0 h	1	1.00001	1	1	3.51188e-06	1.00001	1	1.00002	1.00001	1.19304e-05	0.327635	ns
	36 h	0.811581	0.875577	0.837743	0.841634	0.0321749	0.581014	0.605651	0.629896	0.60552	0.0244413	0.000536339	***
	48 h	0.709548	0.724326	0.731531	0.721802	0.0112068	0.488231	0.41325	0.508583	0.470021	0.0502075	0.00106139	**
	72 h	0.585691	0.610785	0.68421	0.626895	0.0511972	0.305428	0.262358	0.287369	0.285052	0.0216283	0.000439671	***
	Fig.S8d
		Col-0					PUB26-OX		pub25 26			PUB26-OX vs Col-0
		R1	R2	R3	Mean	SD	R1	R2	R3	Mean	SD	t test p value
	0 h	1	1	1	1	0	1.00004	1	1	1.00001	1.87705e-05	0.256516	ns
	36 h	0.844157	0.767662	0.902864	0.838228	0.0677957	0.632188	0.604993	0.615377	0.617519	0.0137235	0.00523618	**
	48 h	0.558943	0.533127	0.554092	0.548721	0.0137206	0.460823	0.470968	0.492671	0.474821	0.0162698	0.00384914	**
	72 h	0.408849	0.414414	0.392701	0.405321	0.0112782	0.257843	0.280239	0.266175	0.268086	0.0113196	0.000118925	***
	Fig.S8f
			R1	R2	R3	Mean	SD		t test p value
	Col-0	0 h	1.00006	1	1.00027	1.00011	0.000141589
		24 h	1.71121	1.38771	1.85903	1.65265	0.241053
		48 h	1.86949	1.82161	2.39676	2.02929	0.319138
	PUB26-OX	0 h	0.769986	0.975902	1.01003	0.91864	0.129865	PUB26-OX 0 h vs. Col-0 0 h	0.33831	ns
		24 h	0.615056	0.830646	0.969605	0.805102	0.178649	PUB26-OX 24 h vs. Col-0 24 h	0.00808617	**
		48 h	1.195	1.06882	1.60322	1.28901	0.279331	PUB26-OX 48 h vs. Col-0 48 h	0.0390398	*
	ATG1a-OX	0 h	0.923766	1.14088	1.29035	1.11833	0.184328	ATG1a-OX 0 h vs. Col-0 0 h	0.328899	ns
		24 h	1.88096	1.74106	2.5675	2.06318	0.442326	ATG1a-OX 24 h vs. Col-0 24 h	0.230931	ns
		48 h	2.12144	2.67024	3.06527	2.61898	0.474	ATG1a-OX 48 h vs. Col-0 48 h	0.148396	ns
	PUB26-OX/ATG1a-OX	0 h	1.15261	1.12719	1.54277	1.27419	0.232943	PUB26-OX/ATG1a-OX 0 h vs. Col-0 0 h	0.111203	ns
		24 h	1.3822	1.48789	2.00809	1.62606	0.335037	PUB26-OX/ATG1a-OX 24 h vs. Col-0 24 h	0.916527	ns
		48 h	1.81599	2.00501	2.65268	2.15789	0.438796	PUB26-OX/ATG1a-OX 48 h vs. Col-0 48 h	0.702454	ns
	Fig.S8h
		Col-0			atg1abct			ATG1a-OX #1			ATG1a-OX #2			PUB25-OX			PUB26-OX			PUB25-OX/ATG1a-OX			PUB26-OX/ATG1a-OX
		R1	R2	R3	R1	R2	R3	R1	R2	R3	R1	R2	R3	R1	R2	R3	R1	R2	R3	R1	R2	R3	R1	R2	R3
	+N	93.0192	102.1	104.881	95.7785	102.177	105.279	105.951	95.8426	101.424	96.5272	105.952	97.0712	102.46	95.2389	105.088	96.3687	99.4754	105.775	103.514	96.1166	100.1	103.882	95.6012	98.5713
	-N	58.12	52.9234	55.3118	28.6845	32.2593	26.994	54.818	55.2219	58.4337	57.3503	50.8834	55.5876	35.1836	39.1494	40.7813	37.2368	43.296	39.3948	51.7697	53.4127	57.431	54.194	49.0538	56.8017
	+N								-N
	Tukey HSD								Tukey HSD
	(I) VAR00001	(J) VAR00001	Mean Difference (I-J)	Std. Error	Sig.	95% Confidence Interval			(I) VAR00001	(J) VAR00001	Mean Difference (I-J)	Std. Error	Sig.	95% Confidence Interval
						Lower Bound	Upper Bound							Lower Bound	Upper Bound
	Col-0	atg1abct	-1.07804	4.04012	0.999992	-15.0656	12.9095		Col-0	atg1abct	26.13916*	2.42966	2.27538e-07	17.7273	34.551
		ATG1a-OX 1#	-1.07259	4.04012	0.999993	-15.0601	12.9149			ATG1a-OX 1#	-0.706116	2.42966	0.999987	-9.11796	7.70573
		ATG1a-OX 2#	0.150149	4.04012	1	-13.8374	14.1377			ATG1a-OX 2#	0.844672	2.42966	0.999955	-7.56717	9.25652
		PUB25-OX	-0.928615	4.04012	0.999997	-14.9161	13.0589			PUB25-OX	17.08035*	2.42966	6.18065e-05	8.66851	25.4922
		PUB26-OX	-0.539672	4.04012	1	-14.5272	13.4478			PUB26-OX	15.47585*	2.42966	0.000197394	7.06401	23.8877
		PUB25-OX/ATG1a-OX	0.0899213	4.04012	1	-13.8976	14.0774			PUB25-OX/ATG1a-OX	1.24729	2.42966	0.999398	-7.16455	9.65913
		PUB26-OX/ATG1a-OX	0.648522	4.04012	1	-13.339	14.636			PUB26-OX/ATG1a-OX	2.10191	2.42966	0.985372	-6.30993	10.5138
	atg1abct	Col-0	1.07804	4.04012	0.999992	-12.9095	15.0656		atg1abct	Col-0	-26.13916*	2.42966	2.27538e-07	-34.551	-17.7273
		ATG1a-OX 1#	0.00545833	4.04012	1	-13.9821	13.993			ATG1a-OX 1#	-26.84527*	2.42966	1.56176e-07	-35.2571	-18.4334
		ATG1a-OX 2#	1.22819	4.04012	0.999982	-12.7593	15.2157			ATG1a-OX 2#	-25.29449*	2.42966	3.60587e-07	-33.7063	-16.8826
		PUB25-OX	0.149429	4.04012	1	-13.8381	14.1369			PUB25-OX	-9.05881*	2.42966	0.0301899	-17.4706	-0.646963
		PUB26-OX	0.538372	4.04012	1	-13.4491	14.5259			PUB26-OX	-10.66330*	2.42966	0.00838834	-19.0751	-2.25146
		PUB25-OX/ATG1a-OX	1.16797	4.04012	0.999987	-12.8196	15.1555			PUB25-OX/ATG1a-OX	-24.89187*	2.42966	4.50895e-07	-33.3037	-16.48
		PUB26-OX/ATG1a-OX	1.72657	4.04012	0.999819	-12.261	15.7141			PUB26-OX/ATG1a-OX	-24.03725*	2.42966	7.31114e-07	-32.4491	-15.6254
	ATG1a-OX 1#	Col-0	1.07259	4.04012	0.999993	-12.9149	15.0601		ATG1a-OX 1#	Col-0	0.706116	2.42966	0.999987	-7.70573	9.11796
		atg1abct	-0.00545833	4.04012	1	-13.993	13.9821			atg1abct	26.84527*	2.42966	1.56176e-07	18.4334	35.2571
		ATG1a-OX 2#	1.22274	4.04012	0.999982	-12.7648	15.2103			ATG1a-OX 2#	1.55079	2.42966	0.997599	-6.86105	9.96263
		PUB25-OX	0.14397	4.04012	1	-13.8436	14.1315			PUB25-OX	17.78647*	2.42966	3.77032e-05	9.37463	26.1983
		PUB26-OX	0.532914	4.04012	1	-13.4546	14.5204			PUB26-OX	16.18197*	2.42966	0.00011765	7.77013	24.5938
		PUB25-OX/ATG1a-OX	1.16251	4.04012	0.999987	-12.825	15.15			PUB25-OX/ATG1a-OX	1.95341	2.42966	0.990376	-6.45844	10.3652
		PUB26-OX/ATG1a-OX	1.72111	4.04012	0.999823	-12.2664	15.7086			PUB26-OX/ATG1a-OX	2.80802	2.42966	0.933429	-5.60382	11.2199
	ATG1a-OX 2#	Col-0	-0.150149	4.04012	1	-14.1377	13.8374		ATG1a-OX 2#	Col-0	-0.844672	2.42966	0.999955	-9.25652	7.56717
		atg1abct	-1.22819	4.04012	0.999982	-15.2157	12.7593			atg1abct	25.29449*	2.42966	3.60587e-07	16.8826	33.7063
		ATG1a-OX 1#	-1.22274	4.04012	0.999982	-15.2103	12.7648			ATG1a-OX 1#	-1.55079	2.42966	0.997599	-9.96263	6.86105
		PUB25-OX	-1.07876	4.04012	0.999992	-15.0663	12.9088			PUB25-OX	16.23568*	2.42966	0.000113156	7.82384	24.6475
		PUB26-OX	-0.689821	4.04012	1	-14.6773	13.2977			PUB26-OX	14.63118*	2.42966	0.000371353	6.21934	23.043
		PUB25-OX/ATG1a-OX	-0.060228	4.04012	1	-14.0477	13.9273			PUB25-OX/ATG1a-OX	0.402617	2.42966	1	-8.00923	8.81446
		PUB26-OX/ATG1a-OX	0.498372	4.04012	1	-13.4891	14.4859			PUB26-OX/ATG1a-OX	1.25724	2.42966	0.999366	-7.15461	9.66908
	PUB25-OX	Col-0	0.928615	4.04012	0.999997	-13.0589	14.9161		PUB25-OX	Col-0	-17.08035*	2.42966	6.18065e-05	-25.4922	-8.66851
		atg1abct	-0.149429	4.04012	1	-14.1369	13.8381			atg1abct	9.05881*	2.42966	0.0301899	0.646963	17.4706
		ATG1a-OX 1#	-0.14397	4.04012	1	-14.1315	13.8436			ATG1a-OX 1#	-17.78647*	2.42966	3.77032e-05	-26.1983	-9.37463
		ATG1a-OX 2#	1.07876	4.04012	0.999992	-12.9088	15.0663			ATG1a-OX 2#	-16.23568*	2.42966	0.000113156	-24.6475	-7.82384
		PUB26-OX	0.388944	4.04012	1	-13.5986	14.3765			PUB26-OX	-1.6045	2.42966	0.997037	-10.0163	6.80735
		PUB25-OX/ATG1a-OX	1.01854	4.04012	0.999995	-12.969	15.0061			PUB25-OX/ATG1a-OX	-15.83306*	2.42966	0.000151739	-24.2449	-7.42122
		PUB26-OX/ATG1a-OX	1.57714	4.04012	0.999901	-12.4104	15.5647			PUB26-OX/ATG1a-OX	-14.97844*	2.42966	0.000285911	-23.3903	-6.5666
	PUB26-OX	Col-0	0.539672	4.04012	1	-13.4478	14.5272		PUB26-OX	Col-0	-15.47585*	2.42966	0.000197394	-23.8877	-7.06401
		atg1abct	-0.538372	4.04012	1	-14.5259	13.4491			atg1abct	10.66330*	2.42966	0.00838834	2.25146	19.0751
		ATG1a-OX 1#	-0.532914	4.04012	1	-14.5204	13.4546			ATG1a-OX 1#	-16.18197*	2.42966	0.00011765	-24.5938	-7.77013
		ATG1a-OX 2#	0.689821	4.04012	1	-13.2977	14.6773			ATG1a-OX 2#	-14.63118*	2.42966	0.000371353	-23.043	-6.21934
		PUB25-OX	-0.388944	4.04012	1	-14.3765	13.5986			PUB25-OX	1.6045	2.42966	0.997037	-6.80735	10.0163
		PUB25-OX/ATG1a-OX	0.629593	4.04012	1	-13.3579	14.6171			PUB25-OX/ATG1a-OX	-14.22856*	2.42966	0.000504278	-22.6404	-5.81672
		PUB26-OX/ATG1a-OX	1.18819	4.04012	0.999985	-12.7993	15.1757			PUB26-OX/ATG1a-OX	-13.37395*	2.42966	0.000974626	-21.7858	-4.9621
	PUB25-OX/ATG1a-OX	Col-0	-0.0899213	4.04012	1	-14.0774	13.8976		PUB25-OX/ATG1a-OX	Col-0	-1.24729	2.42966	0.999398	-9.65913	7.16455
		atg1abct	-1.16797	4.04012	0.999987	-15.1555	12.8196			atg1abct	24.89187*	2.42966	4.50895e-07	16.48	33.3037
		ATG1a-OX 1#	-1.16251	4.04012	0.999987	-15.15	12.825			ATG1a-OX 1#	-1.95341	2.42966	0.990376	-10.3652	6.45844
		ATG1a-OX 2#	0.060228	4.04012	1	-13.9273	14.0477			ATG1a-OX 2#	-0.402617	2.42966	1	-8.81446	8.00923
		PUB25-OX	-1.01854	4.04012	0.999995	-15.0061	12.969			PUB25-OX	15.83306*	2.42966	0.000151739	7.42122	24.2449
		PUB26-OX	-0.629593	4.04012	1	-14.6171	13.3579			PUB26-OX	14.22856*	2.42966	0.000504278	5.81672	22.6404
		PUB26-OX/ATG1a-OX	0.5586	4.04012	1	-13.4289	14.5461			PUB26-OX/ATG1a-OX	0.854619	2.42966	0.999951	-7.55722	9.26646
	PUB26-OX/ATG1a-OX	Col-0	-0.648522	4.04012	1	-14.636	13.339		PUB26-OX/ATG1a-OX	Col-0	-2.10191	2.42966	0.985372	-10.5138	6.30993
		atg1abct	-1.72657	4.04012	0.999819	-15.7141	12.261			atg1abct	24.03725*	2.42966	7.31114e-07	15.6254	32.4491
		ATG1a-OX 1#	-1.72111	4.04012	0.999823	-15.7086	12.2664			ATG1a-OX 1#	-2.80802	2.42966	0.933429	-11.2199	5.60382
		ATG1a-OX 2#	-0.498372	4.04012	1	-14.4859	13.4891			ATG1a-OX 2#	-1.25724	2.42966	0.999366	-9.66908	7.15461
		PUB25-OX	-1.57714	4.04012	0.999901	-15.5647	12.4104			PUB25-OX	14.97844*	2.42966	0.000285911	6.5666	23.3903
		PUB26-OX	-1.18819	4.04012	0.999985	-15.1757	12.7993			PUB26-OX	13.37395*	2.42966	0.000974626	4.9621	21.7858
		PUB25-OX/ATG1a-OX	-0.5586	4.04012	1	-14.5461	13.4289			PUB25-OX/ATG1a-OX	-0.854619	2.42966	0.999951	-9.26646	7.55722

## Sheet: Fig.S9
	Fig.S9a
	PUB25-C								PUB26-C
		R1	R2	R3	Mean	SD	t test p value			R1	R2	R3	Mean	SD	t test p value
	0 h	1.05143	1.12977	0.841844	1.00768	0.148864			0 h	0.999582	0.811327	1.18511	0.998673	0.186894
	4 h	0.68318	0.649747	0.667426	0.666784	0.0167257	0.0169374	*	4 h	0.371392	0.397145	0.453471	0.407336	0.0419778	0.00589732	**
	8 h	0.396879	0.484309	0.418604	0.433264	0.0455213	0.00307645	**	8 h	0.358295	0.193875	0.238846	0.263672	0.0849749	0.00344007	**
	12 h	0.235696	0.165667	0.246508	0.215957	0.0438866	0.000905641	***	12 h	0.251915	0.244956	0.271627	0.256166	0.0138343	0.00236114	**
	24 h	0.215078	0.27209	0.231571	0.23958	0.0293376	0.000932691	***	24 h	0.222626	0.149132	0.16243	0.178063	0.0391616	0.00173993	**
	Fig.S9b
	PUB25-N								PUB26-N
		R1	R2	R3	Mean	SD	t test p value			R1	R2	R3	Mean	SD	t test p value
	0 h	0.98741	1.03441	1.01996	1.01393	0.0240747			0 h	1.18511	0.766375	0.835527	0.929004	0.224474
	4 h	0.659959	0.771235	0.729077	0.72009	0.0561797	0.00113657	4 vs. 0 **	4 h	0.408073	0.434906	0.483337	0.442105	0.038145	0.0207655	*
	8 h	0.837772	0.685037	0.765069	0.762626	0.0763968	0.00556512	8 vs. 0 **	8 h	0.585602	0.4708	0.441894	0.499432	0.0760121	0.0348649	*
	12 h	0.716494	0.707768	0.701751	0.708671	0.00741287	3.0453e-05	12 vs. 0 ***	12 h	0.414881	0.404075	0.47627	0.431742	0.038939	0.0194284	*
	24 h	0.378328	0.362338	0.330634	0.3571	0.0242745	4.86415e-06	24 vs. 0 ***	24 h	0.301742	0.379111	0.318806	0.33322	0.0406486	0.0106296	*
	Fig.S9e
			R1	R2	R3	Mean	SD	t test p value
	PUB25-MYC	0 h	1	1	1	1	9.68593e-08
		24 h	1.05167	1.03685	0.994552	1.02769	0.0296387	0.180936	ns
		36 h	0.948986	1.02278	1.02611	0.999291	0.0435976	0.978885	ns
		48 h	1.023	1.05999	1.01325	1.03208	0.0246593	0.0873123	ns
		72 h	1.02323	1.07917	0.991848	1.03142	0.0442342	0.286055	ns
	PUB26-MYC	0 h	1	1	1	1	1.15231e-07
		24 h	1.0216	1.00001	1.02481	1.01547	0.0134905	0.117911	ns
		36 h	1.01534	0.957981	1.01079	0.994704	0.0318844	0.787859	ns
		48 h	0.995693	0.971105	1.00841	0.991736	0.0189647	0.492383	ns
		72 h	1.02445	0.971473	1.0222	1.00604	0.0299573	0.744505	ns
	Fig.S9f
			R1	R2	R3	Mean	SD	t test p value
	PUB25-FLAG	0 h	1	1	1	1	3.9929e-08
		24 h	1.23072	1.22195	1.21515	1.22261	0.00781008	1.00735e-06	***
		36 h	1.16609	1.11762	1.12805	1.13725	0.0255101	0.000737966	***
		48 h	0.961413	0.940488	0.92789	0.943264	0.0169331	0.00438522	**
		72 h	0.973262	0.946382	0.932139	0.950594	0.0208824	0.0148792	*
	PUB26-FLAG	0 h	1	1	1	1	2.35276e-08
		24 h	1.21171	1.21295	1.22165	1.21543	0.00541604	2.65938e-07	***
		36 h	1.15314	1.14546	1.17214	1.15691	0.0137297	3.84195e-05	***
		48 h	0.944311	0.948031	0.948074	0.946805	0.00216019	1.80639e-06	***
		72 h	0.980834	0.969951	0.962236	0.971007	0.00934344	0.00578952	**
	Fig.S9g
			R1	R2	R3	Mean	SD	t test p value
	PUB25-FLAG	0 h	1	1	1	1	1.91248e-07
		24 h	2.00436	2.0481	2.04327	2.03191	0.0239809	1.94218e-07	***
		36 h	2.47858	2.60584	2.7357	2.60671	0.128561	2.69429e-05	***
		48 h	4.8153	5.03907	5.27911	5.04449	0.231954	7.15972e-06	***
		72 h	5.02466	5.5315	4.35164	4.96927	0.591879	0.000313935	***
	PUB26-FLAG	0 h	1	1	1	1	1.87107e-07
		24 h	1.93924	2.04122	2.11414	2.03154	0.0878532	3.45171e-05	***
		36 h	2.72496	2.95788	2.91428	2.8657	0.123826	1.28097e-05	***
		48 h	5.77474	5.4634	6.16723	5.80179	0.352694	1.91734e-05	***
		72 h	4.95202	4.89809	5.77622	5.20878	0.492161	0.000120957	***
	Fig.S9k
			R1	R2	R3	Mean	SD	t test p value
	PUB25-MYC	0 h	1	1	1	1	2.65094e-07
		24 h	0.948826	0.937912	0.942459	0.943066	0.00548199	5.61396e-05	***
		36 h	0.886527	0.830077	0.877385	0.864663	0.0302993	0.00150344	**
		48 h	0.925404	0.78279	0.829382	0.845859	0.0727207	0.0213665	*
		72 h	0.842758	0.739382	0.766137	0.782759	0.053655	0.00217716	**
	PUB26-MYC	0 h	1	1	1	1	1.28386e-07
		24 h	0.804177	0.851379	0.87572	0.843759	0.036375	0.00174323	**
		36 h	0.604433	0.640441	0.657159	0.634011	0.026945	1.93526e-05	***
		48 h	0.632482	0.693254	0.707591	0.677776	0.0398748	0.000151159	***
		72 h	0.604031	0.622726	0.666229	0.630995	0.0319126	3.66812e-05	***

## Sheet: Fig.S11
	Fig.S11a
			R1	R2	R3	Mean	SD	t test p value
	PUB26-MYC/Col-0	0 h	0.332275	0.303037	0.261348	0.298887	0.0356455
		48 h	0.727575	0.732438	0.601582	0.687198	0.0741856
	PUB26-MYC/atg1abct	0 h	0.379539	0.406136	0.333789	0.373155	0.0365936	0.0654915	PUB26-MYC/Col-0 0 h vs. PUB26-MYC/atg1abct 0 h	ns
		48 h	0.72202	0.695248	0.702692	0.706653	0.0138186	0.678314	PUB26-MYC/Col-0 48 h vs. PUB26-MYC/atg1abct 48 h	ns
	Fig.S11b
			R1	R2	R3	Mean	SD	t test p value
	PUB26-FLAG/Col-0	0 h	0.18372	0.222862	0.1691	0.191894	0.0277975
		48 h	0.650187	0.702272	0.680441	0.677633	0.026156
	PUB26-FLAG/ATG1a-OX	0 h	0.222089	0.239005	0.264572	0.241889	0.0213881	0.0690276	PUB26-FLAG/Col-0 0 h vs. PUB26-FLAG/ATG1a-OX 0 h	ns
		48 h	0.690247	0.704527	0.723497	0.70609	0.0166799	0.187292	PUB26-FLAG/Col-0 48 h vs. PUB26-FLAG/ATG1a-OX 48 h	ns
	Fig.S11d
		Col-0			atg5-1			ost1			cpk28
		R1	R2	R3	R1	R2	R3	R1	R2	R3	R1	R2	R3
	+N	1.01507	1.28443	1.15531	1.13668	1.03931	1.11543	1.24822	0.979727	1.28443	1.13029	1.03931	0.975022
	-N	0.312753	0.368037	0.321818	0.229672	0.215046	0.191969	0.420442	0.344141	0.263761	0.346557	0.311836	0.368037
	+N								-N
	Multiple Comparisons								Multiple Comparisons
	Dependent Variable:	VAR00002							Dependent Variable:	VAR00002
	Tukey HSD								Tukey HSD
	(I) VAR00001		Mean Difference (I-J)	Std. Error	Sig.	95% Confidence Interval			(I) VAR00001		Mean Difference (I-J)	Std. Error	Sig.	95% Confidence Interval
						Lower Bound	Upper Bound							Lower Bound	Upper Bound
	Col-0	atg5-1	0.0544645	0.0953617	0.937962	-0.250917	0.359846		Col-0	atg5-1	.12197*	0.0369308	0.0434228	0.00370828	0.240239
		ost1	-0.0191868	0.0953617	0.996875	-0.324569	0.286195			ost1	-0.00857848	0.0369308	0.995225	-0.126844	0.109687
		cpk28	0.103399	0.0953617	0.708125	-0.201983	0.408781			cpk28	-0.00794048	0.0369308	0.996198	-0.126206	0.110325
	atg5-1	Col-0	-0.0544645	0.0953617	0.937962	-0.359846	0.250917		atg5-1	Col-0	-.12197*	0.0369308	0.0434228	-0.240239	-0.00370828
		ost1	-0.0736513	0.0953617	0.864775	-0.379033	0.23173			ost1	-.13055*	0.0369308	0.0314085	-0.248818	-0.0122868
		cpk28	0.0489347	0.0953617	0.953616	-0.256447	0.354316			cpk28	-.12991*	0.0369308	0.03217	-0.24818	-0.0116488
	ost1	Col-0	0.0191868	0.0953617	0.996875	-0.286195	0.324569		ost1	Col-0	0.00857848	0.0369308	0.995225	-0.109687	0.126844
		atg5-1	0.0736513	0.0953617	0.864775	-0.23173	0.379033			atg5-1	.13055*	0.0369308	0.0314085	0.0122868	0.248818
		cpk28	0.122586	0.0953617	0.595808	-0.182796	0.427968			cpk28	0.000638	0.0369308	0.999998	-0.117628	0.118904
	cpk28	Col-0	-0.103399	0.0953617	0.708125	-0.408781	0.201983		cpk28	Col-0	0.00794048	0.0369308	0.996198	-0.110325	0.126206
		atg5-1	-0.0489347	0.0953617	0.953616	-0.354316	0.256447			atg5-1	.12991*	0.0369308	0.03217	0.0116488	0.24818
		ost1	-0.122586	0.0953617	0.595808	-0.427968	0.182796			ost1	-0.000638	0.0369308	0.999998	-0.118904	0.117628
									*. The mean difference is significant at the 0.05 level.
	Fig.S11f
		Col-0			atg5-1			ost1			cpk28
		R1	R2	R3	R1	R2	R3	R1	R2	R3	R1	R2	R3
	+N	102.614	106.562	102.746	104.817	102.469	102.757	94.7261	99.1986	101.435	92.4146	101.019	99.9159
	-N	67.6698	70.4764	72.282	27.1728	24.7074	28.8256	65.026	73.32	70.0028	76.1451	69.1247	72.282
	+N								-N
	Multiple Comparisons								Multiple Comparisons
	Dependent Variable:	VAR00002							Dependent Variable:	VAR00002
	Tukey HSD								Tukey HSD
	(I) VAR00001		Mean Difference (I-J)	Std. Error	Sig.	95% Confidence Interval			(I) VAR00001		Mean Difference (I-J)	Std. Error	Sig.	95% Confidence Interval
						Lower Bound	Upper Bound							Lower Bound	Upper Bound
	Col-0	atg5-1	0.62648	2.59026	0.994622	-7.66844	8.92139		Col-0	atg5-1	43.24083*	2.56536	7.34898e-07	35.0256	51.456
		ost1	5.52081	2.59026	0.222261	-2.77411	13.8157			ost1	0.693156	2.56536	0.992557	-7.52204	8.90835
		cpk28	6.19084	2.59026	0.156528	-2.10407	14.4858			cpk28	-2.37453	2.56536	0.792538	-10.5897	5.84067
	atg5-1	Col-0	-0.62648	2.59026	0.994622	-8.92139	7.66844		atg5-1	Col-0	-43.24083*	2.56536	7.34898e-07	-51.456	-35.0256
		ost1	4.89433	2.59026	0.304005	-3.40058	13.1892			ost1	-42.54767*	2.56536	8.33412e-07	-50.7629	-34.3325
		cpk28	5.56436	2.59026	0.217343	-2.73055	13.8593			cpk28	-45.61536*	2.56536	4.8436e-07	-53.8306	-37.4002
	ost1	Col-0	-5.52081	2.59026	0.222261	-13.8157	2.77411		ost1	Col-0	-0.693156	2.56536	0.992557	-8.90835	7.52204
		atg5-1	-4.89433	2.59026	0.304005	-13.1892	3.40058			atg5-1	42.54767*	2.56536	8.33412e-07	34.3325	50.7629
		cpk28	0.670033	2.59026	0.993449	-7.62488	8.96495			cpk28	-3.06768	2.56536	0.645986	-11.2829	5.14751
	cpk28	Col-0	-6.19084	2.59026	0.156528	-14.4858	2.10407		cpk28	Col-0	2.37453	2.56536	0.792538	-5.84067	10.5897
		atg5-1	-5.56436	2.59026	0.217343	-13.8593	2.73055			atg5-1	45.61536*	2.56536	4.8436e-07	37.4002	53.8306
		ost1	-0.670033	2.59026	0.993449	-8.96495	7.62488			ost1	3.06768	2.56536	0.645986	-5.14751	11.2829
									*. The mean difference is significant at the 0.05 level.
	Fig.S11g
		Col-0					cpk28					cpk28 vs Col-0
		R1	R2	R3	Mean	SD	R1	R2	R3	Mean	SD	t test p value
	0 h	1	1	1	1	0	1.11661	1.14678	0.97592	1.07977	0.0911942	0.204323	ns
	12 h	1.43729	1.20748	1.55164	1.39881	0.175282	1.65757	1.7382	1.63039	1.67539	0.0560699	0.0598533	ns
	24 h	1.63388	1.6766	1.60643	1.63897	0.0353611	1.78783	1.82872	1.734	1.78351	0.0475035	0.0133956	*
	36 h	2.77966	2.89906	2.71038	2.79637	0.0954437	2.83209	2.18896	2.68558	2.56887	0.337074	0.32362	ns
	48 h	2.59472	2.67374	2.55889	2.60912	0.0587675	2.6978	3.08446	2.86383	2.88203	0.193973	0.0800548	ns
	Fig.S11h
		Col-0					ost1					ost1 vs Col-0
		R1	R2	R3	Mean	SD	R1	R2	R3	Mean	SD	t test p value
	0 h	1	1	1	1	0	1.0148	1.15563	1.0558	1.07541	0.0724383	0.145708	ns
	12 h	1.44969	1.54837	1.54751	1.51519	0.0567245	1.2325	1.23112	1.25854	1.24072	0.0154476	0.00127089	**
	24 h	1.8649	1.95721	1.96124	1.92779	0.0544984	1.22856	1.30912	1.33329	1.29032	0.0548361	0.000139637	***
	36 h	2.01621	2.07882	2.16325	2.08609	0.0737877	1.51442	1.53277	1.55815	1.53511	0.0219575	0.000243435	***
	48 h	2.42995	2.52471	2.57055	2.5084	0.0717061	1.24967	1.34043	1.27205	1.28738	0.0472808	1.61453e-05	***

## Sheet: Fig.S17
	Fig.S17b
		Col-0			atg5-1			fer-4			FER-GFP/fer-4
		R1	R2	R3	R1	R2	R3	R1	R2	R3	R1	R2	R3
	+N	1.55547	1.50186	1.45472	1.3855	1.43352	1.35531	0.995844	1.13352	1.05143	1.41112	1.33614	1.44794
	-N	0.285647	0.305155	0.266106	0.057915	0.048549	0.049515	0.060644	0.049709	0.051033	0.328246	0.3004	0.272576
	+N									-N
	Multiple Comparisons									Multiple Comparisons
	Dependent Variable:	VAR00002								Dependent Variable:	VAR00002
	Tukey HSD	N+								Tukey HSD	N-
	(I) VAR00001		Mean Difference (I-J)	Std. Error	Sig.	95% Confidence Interval				(I) VAR00001		Mean Difference (I-J)	Std. Error	Sig.	95% Confidence Interval
						Lower Bound	Upper Bound								Lower Bound	Upper Bound
	Col-0	atg5-1	0.112571	0.0449819	0.133936	-0.0314774	0.256619			Col-0	atg5-1	.23364*	0.0142487	9.10673e-07	0.188014	0.279273
		fer-4	.44375*	0.0449819	4.37591e-05	0.299703	0.587799				fer-4	.23184*	0.0142487	9.67184e-07	0.186211	0.27747
		FER-GFP/fer-4	0.105617	0.0449819	0.165847	-0.0384311	0.249665				FER-GFP/fer-4	-0.0147712	0.0142487	0.734148	-0.0604006	0.0308582
	atg5-1	Col-0	-0.112571	0.0449819	0.133936	-0.256619	0.0314774			atg5-1	Col-0	-.23364*	0.0142487	9.10673e-07	-0.279273	-0.188014
		fer-4	.33118*	0.0449819	0.000361845	0.187132	0.475228				fer-4	-0.00180233	0.0142487	0.999214	-0.0474317	0.0438271
		FER-GFP/fer-4	-0.00695367	0.0449819	0.998571	-0.151002	0.137094				FER-GFP/fer-4	-.24841*	0.0142487	5.64925e-07	-0.294044	-0.202785
	fer-4	Col-0	-.44375*	0.0449819	4.37591e-05	-0.587799	-0.299703			fer-4	Col-0	-.23184*	0.0142487	9.67184e-07	-0.27747	-0.186211
		atg5-1	-.33118*	0.0449819	0.000361845	-0.475228	-0.187132				atg5-1	0.00180233	0.0142487	0.999214	-0.0438271	0.0474317
		FER-GFP/fer-4	-.33813*	0.0449819	0.000312761	-0.482182	-0.194086				FER-GFP/fer-4	-.24661*	0.0142487	5.9794e-07	-0.292241	-0.200983
	FER-GFP/fer-4	Col-0	-0.105617	0.0449819	0.165847	-0.249665	0.0384311			FER-GFP/fer-4	Col-0	0.0147712	0.0142487	0.734148	-0.0308582	0.0604006
		atg5-1	0.00695367	0.0449819	0.998571	-0.137094	0.151002				atg5-1	.24841*	0.0142487	5.64925e-07	0.202785	0.294044
		fer-4	.33813*	0.0449819	0.000312761	0.194086	0.482182				fer-4	.24661*	0.0142487	5.9794e-07	0.200983	0.292241
	*. The mean difference is significant at the 0.05 level.									*. The mean difference is significant at the 0.05 level.
	Fig.S17d
		Col-0			atg5-1			fer-4			FER-GFP/fer-4
		R1	R2	R3	R1	R2	R3	R1	R2	R3	R1	R2	R3
	+N	98.1389	100.242	105.576	101.443	99.9177	100.286	88.5897	82.0036	80.7056	100.879	98.8022	100.901
	-N	67.1225	63.8106	75.8222	46.4618	38.5103	36.4388	43.8054	38.0966	37.3471	74.0614	61.6543	76.4542
	+N								-N
	Multiple Comparisons								Multiple Comparisons
	Dependent Variable:	VAR00002							Dependent Variable:	VAR00002
	Tukey HSD								Tukey HSD
	(I) VAR00001		Mean Difference (I-J)	Std. Error	Sig.	95% Confidence Interval			(I) VAR00001		Mean Difference (I-J)	Std. Error	Sig.	95% Confidence Interval
						Lower Bound	Upper Bound							Lower Bound	Upper Bound
	+N Col-0	+N atg5-1	0.77008	2.40331	0.987772	-6.92615	8.46631		-N Col-0	-N atg5-1	28.44816*	4.86619	0.001724	12.8649	44.0314
		+N fer-4	17.55277*	2.40331	0.000382751	9.85654	25.249			-N fer-4	29.16872*	4.86619	0.00146364	13.5855	44.752
		+N FER-GFP/fer-4	1.1249	2.40331	0.96403	-6.57134	8.82113			-N FER-GFP/fer-4	-1.80489	4.86619	0.981364	-17.3882	13.7784
	+N atg5-1	+N Col-0	-0.77008	2.40331	0.987772	-8.46631	6.92615		-N atg5-1	-N Col-0	-28.44816*	4.86619	0.001724	-44.0314	-12.8649
		+N fer-4	16.78269*	2.40331	0.000522611	9.08646	24.4789			-N fer-4	0.720557	4.86619	0.998743	-14.8627	16.3038
		+N FER-GFP/fer-4	0.354817	2.40331	0.998754	-7.34142	8.05105			-N FER-GFP/fer-4	-30.25305*	4.86619	0.00114957	-45.8363	-14.6698
	+N fer-4	+N Col-0	-17.55277*	2.40331	0.000382751	-25.249	-9.85654		-N fer-4	-N Col-0	-29.16872*	4.86619	0.00146364	-44.752	-13.5855
		+N atg5-1	-16.78269*	2.40331	0.000522611	-24.4789	-9.08646			-N atg5-1	-0.720557	4.86619	0.998743	-16.3038	14.8627
		+N FER-GFP/fer-4	-16.42787*	2.40331	0.000605374	-24.1241	-8.73164			-N FER-GFP/fer-4	-30.97360*	4.86619	0.000982189	-46.5569	-15.3903
	+N FER-GFP/fer-4	+N Col-0	-1.1249	2.40331	0.96403	-8.82113	6.57134		-N FER-GFP/fer-4	-N Col-0	1.80489	4.86619	0.981364	-13.7784	17.3882
		+N atg5-1	-0.354817	2.40331	0.998754	-8.05105	7.34142			-N atg5-1	30.25305*	4.86619	0.00114957	14.6698	45.8363
		+N fer-4	16.42787*	2.40331	0.000605374	8.73164	24.1241			-N fer-4	30.97360*	4.86619	0.000982189	15.3903	46.5569

## Sheet: Fig.S18
	Fig.S18b
			R1	R2	R3	Mean	SD
	+N	Col-0	100	104	106	103.333	3.05505
		atg1abct	108.705	89.9339	99.3196	99.3195	9.38558
		pub25 pub26	111.868	89.5145	100.692	100.691	11.1769
		pub PUB26 #9	94.9441	113.334	104.139	104.139	9.19472
		pub PUB26 #11	105.817	104.155	104.986	104.986	0.8307
		pub PUB26 #14	105.883	92.3098	99.0966	99.0966	6.7868
		pub PUB26T94A #11	99.197	97.6976	101.348	99.4143	1.83503
		pub PUB26T94A #13	112.919	106.921	98.3155	106.052	7.34058
		pub PUB26T94A #18	100.065	87.0533	107.629	98.2492	10.4075
		pub PUB26T94D #10	95.5232	99.0452	95.0265	96.5316	2.19091
		pub PUB26T94D #14	96.6328	101.773	100.472	99.6259	2.67251
		pub PUB26T94D #15	108.078	95.1166	106.148	103.114	6.99307
	-N	Col-0	40.3515	37.4829	35.3515	37.7286	2.50904
		atg1abct	20.3754	19.4944	16.9795	18.9498	1.76224
		pub25 pub26	50.515	52.844	49.618	50.9923	1.66514
		pub PUB26 #9	35.7933	41.2678	33.7933	36.9515	3.86952
		pub PUB26 #11	34.9927	37.3905	40.9927	37.792	3.02008
		pub PUB26 #14	38.6209	35.3388	38.6209	37.5269	1.89492
		pub PUB26T94A #11	51.5029	47.6784	46.5029	48.5614	2.61434
		pub PUB26T94A #13	45.4538	44.3169	51.4538	47.0748	3.83467
		pub PUB26T94A #18	47.1612	44.1052	45.1612	45.4759	1.55212
		pub PUB26T94D #10	22.4929	28.1963	21.4929	24.0607	3.61628
		pub PUB26T94D #14	25.2803	24.1393	20.2803	23.2333	2.62023
		pub PUB26T94D #15	21.1186	22.8078	24.1186	22.6817	1.50397
	+N								-N
	Multiple Comparisons								Multiple Comparisons
	Dependent Variable:	VAR00002							Dependent Variable:	VAR00002
	Tukey HSD								Tukey HSD
	(I) VAR00001		Mean Difference (I-J)	Std. Error	Sig.	95% Confidence Interval			(I) VAR00001		Mean Difference (I-J)	Std. Error	Sig.	95% Confidence Interval
						Lower Bound	Upper Bound							Lower Bound	Upper Bound
	Col-0 +N	atg1abct +N	4.0139	5.67672	0.999833	-16.4543	24.4821		Col-0 -N	atg1abct -N	18.77882*	2.18596	5.00496e-07	10.8971	26.6606
		pub25 pub26 +N	2.64196	5.67672	0.999997	-17.8262	23.1101			pub25 pub26 -N	-13.26369*	2.18596	0.000150304	-21.1455	-5.38192
		pub PUB26 #9 +N	-0.805353	5.67672	1	-21.2735	19.6628			pub PUB26 #9 -N	0.777117	2.18596	1	-7.10466	8.65889
		pub PUB26 #11 +N	-1.65257	5.67672	1	-22.1207	18.8156			pub PUB26 #11 -N	-0.06335	2.18596	1	-7.94512	7.81842
		pub PUB26 #14 +N	4.23684	5.67672	0.999722	-16.2313	24.705			pub PUB26 #14 -N	0.201717	2.18596	1	-7.68006	8.08349
		pub PUB26T94A #11 +N	3.91913	5.67672	0.999868	-16.549	24.3873			pub PUB26T94A #11 -N	-10.83280*	2.18596	0.00218536	-18.7146	-2.95103
		pub PUB26T94A #13 +N	-2.71843	5.67672	0.999997	-23.1866	17.7497			pub PUB26T94A #13 -N	-9.34623*	2.18596	0.0110234	-17.228	-1.46445
		pub PUB26T94A #18 +N	5.08428	5.67672	0.998526	-15.3839	25.5524			pub PUB26T94A #18 -N	-7.74725	2.18596	0.057044	-15.629	0.134519
		pub PUB26T94D #10 +N	6.80179	5.67672	0.984017	-13.6664	27.2699			pub PUB26T94D #10 -N	13.66790*	2.18596	9.67976e-05	5.78613	21.5497
		pub PUB26T94D #14 +N	3.70758	5.67672	0.999923	-16.7606	24.1757			pub PUB26T94D #14 -N	14.49529*	2.18596	3.96666e-05	6.61352	22.3771
		pub PUB26T94D #15 +N	0.219127	5.67672	1	-20.249	20.6873			pub PUB26T94D #15 -N	15.04695*	2.18596	2.2045e-05	7.16517	22.9287
	atg1abct +N	Col-0 +N	-4.0139	5.67672	0.999833	-24.4821	16.4543		atg1abct -N	Col-0 -N	-18.77882*	2.18596	5.00496e-07	-26.6606	-10.8971
		pub25 pub26 +N	-1.37194	5.67672	1	-21.8401	19.0962			pub25 pub26 -N	-32.04251*	2.18596	1.17112e-11	-39.9243	-24.1607
		pub PUB26 #9 +N	-4.81925	5.67672	0.999086	-25.2874	15.6489			pub PUB26 #9 -N	-18.00171*	2.18596	1.06943e-06	-25.8835	-10.1199
		pub PUB26 #11 +N	-5.66647	5.67672	0.996252	-26.1346	14.8017			pub PUB26 #11 -N	-18.84217*	2.18596	4.70782e-07	-26.7239	-10.9604
		pub PUB26 #14 +N	0.222937	5.67672	1	-20.2452	20.6911			pub PUB26 #14 -N	-18.57711*	2.18596	6.08611e-07	-26.4589	-10.6953
		pub PUB26T94A #11 +N	-0.09477	5.67672	1	-20.5629	20.3734			pub PUB26T94A #11 -N	-29.61162*	2.18596	5.95878e-11	-37.4934	-21.7299
		pub PUB26T94A #13 +N	-6.73233	5.67672	0.985201	-27.2005	13.7358			pub PUB26T94A #13 -N	-28.12505*	2.18596	1.75383e-10	-36.0068	-20.2433
		pub PUB26T94A #18 +N	1.07038	5.67672	1	-19.3978	21.5385			pub PUB26T94A #18 -N	-26.52608*	2.18596	5.92245e-10	-34.4078	-18.6443
		pub PUB26T94D #10 +N	2.78789	5.67672	0.999996	-17.6803	23.256			pub PUB26T94D #10 -N	-5.11092	2.18596	0.478899	-12.9927	2.77085
		pub PUB26T94D #14 +N	-0.306323	5.67672	1	-20.7745	20.1618			pub PUB26T94D #14 -N	-4.28353	2.18596	0.713665	-12.1653	3.59824
		pub PUB26T94D #15 +N	-3.79477	5.67672	0.999903	-24.2629	16.6734			pub PUB26T94D #15 -N	-3.73188	2.18596	0.848239	-11.6136	4.1499
	pub25 pub26 +N	Col-0 +N	-2.64196	5.67672	0.999997	-23.1101	17.8262		pub25 pub26 -N	Col-0 -N	13.26369*	2.18596	0.000150304	5.38192	21.1455
		atg1abct +N	1.37194	5.67672	1	-19.0962	21.8401			atg1abct -N	32.04251*	2.18596	1.17112e-11	24.1607	39.9243
		pub PUB26 #9 +N	-3.44731	5.67672	0.999962	-23.9155	17.0208			pub PUB26 #9 -N	14.04081*	2.18596	6.46516e-05	6.15903	21.9226
		pub PUB26 #11 +N	-4.29453	5.67672	0.999684	-24.7627	16.1736			pub PUB26 #11 -N	13.20034*	2.18596	0.00016107	5.31857	21.0821
		pub PUB26 #14 +N	1.59488	5.67672	1	-18.8733	22.063			pub PUB26 #14 -N	13.46541*	2.18596	0.000120633	5.58363	21.3472
		pub PUB26T94A #11 +N	1.27717	5.67672	1	-19.191	21.7453			pub PUB26T94A #11 -N	2.43089	2.18596	0.990982	-5.45088	10.3127
		pub PUB26T94A #13 +N	-5.36039	5.67672	0.997662	-25.8285	15.1078			pub PUB26T94A #13 -N	3.91746	2.18596	0.807056	-3.96431	11.7992
		pub PUB26T94A #18 +N	2.44232	5.67672	0.999999	-18.0258	22.9105			pub PUB26T94A #18 -N	5.51644	2.18596	0.372074	-2.36534	13.3982
		pub PUB26T94D #10 +N	4.15983	5.67672	0.999766	-16.3083	24.628			pub PUB26T94D #10 -N	26.93159*	2.18596	4.32659e-10	19.0498	34.8134
		pub PUB26T94D #14 +N	1.06562	5.67672	1	-19.4025	21.5338			pub PUB26T94D #14 -N	27.75898*	2.18596	2.30598e-10	19.8772	35.6408
		pub PUB26T94D #15 +N	-2.42283	5.67672	0.999999	-22.891	18.0453			pub PUB26T94D #15 -N	28.31064*	2.18596	1.52836e-10	20.4289	36.1924
	pub PUB26 #9 +N	Col-0 +N	0.805353	5.67672	1	-19.6628	21.2735		pub PUB26 #9 -N	Col-0 -N	-0.777117	2.18596	1	-8.65889	7.10466
		atg1abct +N	4.81925	5.67672	0.999086	-15.6489	25.2874			atg1abct -N	18.00171*	2.18596	1.06943e-06	10.1199	25.8835
		pub25 pub26 +N	3.44731	5.67672	0.999962	-17.0208	23.9155			pub25 pub26 -N	-14.04081*	2.18596	6.46516e-05	-21.9226	-6.15903
		pub PUB26 #11 +N	-0.847213	5.67672	1	-21.3154	19.6209			pub PUB26 #11 -N	-0.840467	2.18596	1	-8.72224	7.04131
		pub PUB26 #14 +N	5.04219	5.67672	0.99863	-15.426	25.5103			pub PUB26 #14 -N	-0.5754	2.18596	1	-8.45717	7.30637
		pub PUB26T94A #11 +N	4.72448	5.67672	0.999236	-15.7437	25.1926			pub PUB26T94A #11 -N	-11.60992*	2.18596	0.000926889	-19.4917	-3.72814
		pub PUB26T94A #13 +N	-1.91307	5.67672	1	-22.3812	18.5551			pub PUB26T94A #13 -N	-10.12334*	2.18596	0.00475869	-18.0051	-2.24157
		pub PUB26T94A #18 +N	5.88963	5.67672	0.994837	-14.5785	26.3578			pub PUB26T94A #18 -N	-8.52437*	2.18596	0.0261476	-16.4061	-0.642598
		pub PUB26T94D #10 +N	7.60714	5.67672	0.964446	-12.861	28.0753			pub PUB26T94D #10 -N	12.89079*	2.18596	0.000226025	5.00901	20.7726
		pub PUB26T94D #14 +N	4.51293	5.67672	0.999498	-15.9552	24.9811			pub PUB26T94D #14 -N	13.71817*	2.18596	9.1659e-05	5.8364	21.5999
		pub PUB26T94D #15 +N	1.02448	5.67672	1	-19.4437	21.4926			pub PUB26T94D #15 -N	14.26983*	2.18596	5.05193e-05	6.38806	22.1516
	pub PUB26 #11 +N	Col-0 +N	1.65257	5.67672	1	-18.8156	22.1207		pub PUB26 #11 -N	Col-0 -N	0.06335	2.18596	1	-7.81842	7.94512
		atg1abct +N	5.66647	5.67672	0.996252	-14.8017	26.1346			atg1abct -N	18.84217*	2.18596	4.70782e-07	10.9604	26.7239
		pub25 pub26 +N	4.29453	5.67672	0.999684	-16.1736	24.7627			pub25 pub26 -N	-13.20034*	2.18596	0.00016107	-21.0821	-5.31857
		pub PUB26 #9 +N	0.847213	5.67672	1	-19.6209	21.3154			pub PUB26 #9 -N	0.840467	2.18596	1	-7.04131	8.72224
		pub PUB26 #14 +N	5.8894	5.67672	0.994839	-14.5787	26.3576			pub PUB26 #14 -N	0.265067	2.18596	1	-7.61671	8.14684
		pub PUB26T94A #11 +N	5.5717	5.67672	0.996748	-14.8965	26.0398			pub PUB26T94A #11 -N	-10.76945*	2.18596	0.00234325	-18.6512	-2.88768
		pub PUB26T94A #13 +N	-1.06586	5.67672	1	-21.534	19.4023			pub PUB26T94A #13 -N	-9.28288*	2.18596	0.0117948	-17.1646	-1.4011
		pub PUB26T94A #18 +N	6.73685	5.67672	0.985126	-13.7313	27.205			pub PUB26T94A #18 -N	-7.6839	2.18596	0.0606646	-15.5657	0.197869
		pub PUB26T94D #10 +N	8.45435	5.67672	0.929631	-12.0138	28.9225			pub PUB26T94D #10 -N	13.73125*	2.18596	9.03679e-05	5.84948	21.613
		pub PUB26T94D #14 +N	5.36014	5.67672	0.997663	-15.108	25.8283			pub PUB26T94D #14 -N	14.55864*	2.18596	3.70672e-05	6.67687	22.4404
		pub PUB26T94D #15 +N	1.87169	5.67672	1	-18.5965	22.3398			pub PUB26T94D #15 -N	15.11030*	2.18596	2.06154e-05	7.22852	22.9921
	pub PUB26 #14 +N	Col-0 +N	-4.23684	5.67672	0.999722	-24.705	16.2313		pub PUB26 #14 -N	Col-0 -N	-0.201717	2.18596	1	-8.08349	7.68006
		atg1abct +N	-0.222937	5.67672	1	-20.6911	20.2452			atg1abct -N	18.57711*	2.18596	6.08611e-07	10.6953	26.4589
		pub25 pub26 +N	-1.59488	5.67672	1	-22.063	18.8733			pub25 pub26 -N	-13.46541*	2.18596	0.000120633	-21.3472	-5.58363
		pub PUB26 #9 +N	-5.04219	5.67672	0.99863	-25.5103	15.426			pub PUB26 #9 -N	0.5754	2.18596	1	-7.30637	8.45717
		pub PUB26 #11 +N	-5.8894	5.67672	0.994839	-26.3576	14.5787			pub PUB26 #11 -N	-0.265067	2.18596	1	-8.14684	7.61671
		pub PUB26T94A #11 +N	-0.317707	5.67672	1	-20.7859	20.1504			pub PUB26T94A #11 -N	-11.03452*	2.18596	0.00174968	-18.9163	-3.15274
		pub PUB26T94A #13 +N	-6.95526	5.67672	0.981145	-27.4234	13.5129			pub PUB26T94A #13 -N	-9.54794*	2.18596	0.00887899	-17.4297	-1.66617
		pub PUB26T94A #18 +N	0.847443	5.67672	1	-19.6207	21.3156			pub PUB26T94A #18 -N	-7.94897*	2.18596	0.0467882	-15.8307	-0.0671978
		pub PUB26T94D #10 +N	2.56495	5.67672	0.999998	-17.9032	23.0331			pub PUB26T94D #10 -N	13.46619*	2.18596	0.000120531	5.58441	21.348
		pub PUB26T94D #14 +N	-0.52926	5.67672	1	-20.9974	19.9389			pub PUB26T94D #14 -N	14.29357*	2.18596	4.92466e-05	6.4118	22.1753
		pub PUB26T94D #15 +N	-4.01771	5.67672	0.999832	-24.4859	16.4504			pub PUB26T94D #15 -N	14.84523*	2.18596	2.7307e-05	6.96346	22.727
	pub PUB26T94A #11 +N	Col-0 +N	-3.91913	5.67672	0.999868	-24.3873	16.549		pub PUB26T94A #11 -N	Col-0 -N	10.83280*	2.18596	0.00218536	2.95103	18.7146
		atg1abct +N	0.09477	5.67672	1	-20.3734	20.5629			atg1abct -N	29.61162*	2.18596	5.95878e-11	21.7299	37.4934
		pub25 pub26 +N	-1.27717	5.67672	1	-21.7453	19.191			pub25 pub26 -N	-2.43089	2.18596	0.990982	-10.3127	5.45088
		pub PUB26 #9 +N	-4.72448	5.67672	0.999236	-25.1926	15.7437			pub PUB26 #9 -N	11.60992*	2.18596	0.000926889	3.72814	19.4917
		pub PUB26 #11 +N	-5.5717	5.67672	0.996748	-26.0398	14.8965			pub PUB26 #11 -N	10.76945*	2.18596	0.00234325	2.88768	18.6512
		pub PUB26 #14 +N	0.317707	5.67672	1	-20.1504	20.7859			pub PUB26 #14 -N	11.03452*	2.18596	0.00174968	3.15274	18.9163
		pub PUB26T94A #13 +N	-6.63756	5.67672	0.986706	-27.1057	13.8306			pub PUB26T94A #13 -N	1.48657	2.18596	0.999885	-6.3952	9.36835
		pub PUB26T94A #18 +N	1.16515	5.67672	1	-19.303	21.6333			pub PUB26T94A #18 -N	3.08555	2.18596	0.949794	-4.79623	10.9673
		pub PUB26T94D #10 +N	2.88266	5.67672	0.999994	-17.5855	23.3508			pub PUB26T94D #10 -N	24.50070*	2.18596	3.00188e-09	16.6189	32.3825
		pub PUB26T94D #14 +N	-0.211553	5.67672	1	-20.6797	20.2566			pub PUB26T94D #14 -N	25.32809*	2.18596	1.5296e-09	17.4463	33.2099
		pub PUB26T94D #15 +N	-3.7	5.67672	0.999924	-24.1682	16.7681			pub PUB26T94D #15 -N	25.87975*	2.18596	9.84207e-10	17.998	33.7615
	pub PUB26T94A #13 +N	Col-0 +N	2.71843	5.67672	0.999997	-17.7497	23.1866		pub PUB26T94A #13 -N	Col-0 -N	9.34623*	2.18596	0.0110234	1.46445	17.228
		atg1abct +N	6.73233	5.67672	0.985201	-13.7358	27.2005			atg1abct -N	28.12505*	2.18596	1.75383e-10	20.2433	36.0068
		pub25 pub26 +N	5.36039	5.67672	0.997662	-15.1078	25.8285			pub25 pub26 -N	-3.91746	2.18596	0.807056	-11.7992	3.96431
		pub PUB26 #9 +N	1.91307	5.67672	1	-18.5551	22.3812			pub PUB26 #9 -N	10.12334*	2.18596	0.00475869	2.24157	18.0051
		pub PUB26 #11 +N	1.06586	5.67672	1	-19.4023	21.534			pub PUB26 #11 -N	9.28288*	2.18596	0.0117948	1.4011	17.1646
		pub PUB26 #14 +N	6.95526	5.67672	0.981145	-13.5129	27.4234			pub PUB26 #14 -N	9.54794*	2.18596	0.00887899	1.66617	17.4297
		pub PUB26T94A #11 +N	6.63756	5.67672	0.986706	-13.8306	27.1057			pub PUB26T94A #11 -N	-1.48657	2.18596	0.999885	-9.36835	6.3952
		pub PUB26T94A #18 +N	7.80271	5.67672	0.957826	-12.6654	28.2709			pub PUB26T94A #18 -N	1.59897	2.18596	0.99977	-6.2828	9.48075
		pub PUB26T94D #10 +N	9.52021	5.67672	0.861655	-10.9479	29.9884			pub PUB26T94D #10 -N	23.01413*	2.18596	1.04927e-08	15.1324	30.8959
		pub PUB26T94D #14 +N	6.426	5.67672	0.989637	-14.0421	26.8942			pub PUB26T94D #14 -N	23.84152*	2.18596	5.19514e-09	15.9597	31.7233
		pub PUB26T94D #15 +N	2.93755	5.67672	0.999992	-17.5306	23.4057			pub PUB26T94D #15 -N	24.39317*	2.18596	3.28058e-09	16.5114	32.2749
	pub PUB26T94A #18 +N	Col-0 +N	-5.08428	5.67672	0.998526	-25.5524	15.3839		pub PUB26T94A #18 -N	Col-0 -N	7.74725	2.18596	0.057044	-0.134519	15.629
		atg1abct +N	-1.07038	5.67672	1	-21.5385	19.3978			atg1abct -N	26.52608*	2.18596	5.92245e-10	18.6443	34.4078
		pub25 pub26 +N	-2.44232	5.67672	0.999999	-22.9105	18.0258			pub25 pub26 -N	-5.51644	2.18596	0.372074	-13.3982	2.36534
		pub PUB26 #9 +N	-5.88963	5.67672	0.994837	-26.3578	14.5785			pub PUB26 #9 -N	8.52437*	2.18596	0.0261476	0.642598	16.4061
		pub PUB26 #11 +N	-6.73685	5.67672	0.985126	-27.205	13.7313			pub PUB26 #11 -N	7.6839	2.18596	0.0606646	-0.197869	15.5657
		pub PUB26 #14 +N	-0.847443	5.67672	1	-21.3156	19.6207			pub PUB26 #14 -N	7.94897*	2.18596	0.0467882	0.0671978	15.8307
		pub PUB26T94A #11 +N	-1.16515	5.67672	1	-21.6333	19.303			pub PUB26T94A #11 -N	-3.08555	2.18596	0.949794	-10.9673	4.79623
		pub PUB26T94A #13 +N	-7.80271	5.67672	0.957826	-28.2709	12.6654			pub PUB26T94A #13 -N	-1.59897	2.18596	0.99977	-9.48075	6.2828
		pub PUB26T94D #10 +N	1.71751	5.67672	1	-18.7506	22.1857			pub PUB26T94D #10 -N	21.41516*	2.18596	4.27944e-08	13.5334	29.2969
		pub PUB26T94D #14 +N	-1.3767	5.67672	1	-21.8449	19.0914			pub PUB26T94D #14 -N	22.24254*	2.18596	2.05145e-08	14.3608	30.1243
		pub PUB26T94D #15 +N	-4.86515	5.67672	0.999004	-25.3333	15.603			pub PUB26T94D #15 -N	22.79420*	2.18596	1.26835e-08	14.9124	30.676
	pub PUB26T94D #10 +N	Col-0 +N	-6.80179	5.67672	0.984017	-27.2699	13.6664		pub PUB26T94D #10 -N	Col-0 -N	-13.66790*	2.18596	9.67976e-05	-21.5497	-5.78613
		atg1abct +N	-2.78789	5.67672	0.999996	-23.256	17.6803			atg1abct -N	5.11092	2.18596	0.478899	-2.77085	12.9927
		pub25 pub26 +N	-4.15983	5.67672	0.999766	-24.628	16.3083			pub25 pub26 -N	-26.93159*	2.18596	4.32659e-10	-34.8134	-19.0498
		pub PUB26 #9 +N	-7.60714	5.67672	0.964446	-28.0753	12.861			pub PUB26 #9 -N	-12.89079*	2.18596	0.000226025	-20.7726	-5.00901
		pub PUB26 #11 +N	-8.45435	5.67672	0.929631	-28.9225	12.0138			pub PUB26 #11 -N	-13.73125*	2.18596	9.03679e-05	-21.613	-5.84948
		pub PUB26 #14 +N	-2.56495	5.67672	0.999998	-23.0331	17.9032			pub PUB26 #14 -N	-13.46619*	2.18596	0.000120531	-21.348	-5.58441
		pub PUB26T94A #11 +N	-2.88266	5.67672	0.999994	-23.3508	17.5855			pub PUB26T94A #11 -N	-24.50070*	2.18596	3.00188e-09	-32.3825	-16.6189
		pub PUB26T94A #13 +N	-9.52021	5.67672	0.861655	-29.9884	10.9479			pub PUB26T94A #13 -N	-23.01413*	2.18596	1.04927e-08	-30.8959	-15.1324
		pub PUB26T94A #18 +N	-1.71751	5.67672	1	-22.1857	18.7506			pub PUB26T94A #18 -N	-21.41516*	2.18596	4.27944e-08	-29.2969	-13.5334
		pub PUB26T94D #14 +N	-3.09421	5.67672	0.999987	-23.5624	17.3739			pub PUB26T94D #14 -N	0.827387	2.18596	1	-7.05439	8.70916
		pub PUB26T94D #15 +N	-6.58266	5.67672	0.987522	-27.0508	13.8855			pub PUB26T94D #15 -N	1.37904	2.18596	0.999945	-6.50273	9.26082
	pub PUB26T94D #14 +N	Col-0 +N	-3.70758	5.67672	0.999923	-24.1757	16.7606		pub PUB26T94D #14 -N	Col-0 -N	-14.49529*	2.18596	3.96666e-05	-22.3771	-6.61352
		atg1abct +N	0.306323	5.67672	1	-20.1618	20.7745			atg1abct -N	4.28353	2.18596	0.713665	-3.59824	12.1653
		pub25 pub26 +N	-1.06562	5.67672	1	-21.5338	19.4025			pub25 pub26 -N	-27.75898*	2.18596	2.30598e-10	-35.6408	-19.8772
		pub PUB26 #9 +N	-4.51293	5.67672	0.999498	-24.9811	15.9552			pub PUB26 #9 -N	-13.71817*	2.18596	9.1659e-05	-21.5999	-5.8364
		pub PUB26 #11 +N	-5.36014	5.67672	0.997663	-25.8283	15.108			pub PUB26 #11 -N	-14.55864*	2.18596	3.70672e-05	-22.4404	-6.67687
		pub PUB26 #14 +N	0.52926	5.67672	1	-19.9389	20.9974			pub PUB26 #14 -N	-14.29357*	2.18596	4.92466e-05	-22.1753	-6.4118
		pub PUB26T94A #11 +N	0.211553	5.67672	1	-20.2566	20.6797			pub PUB26T94A #11 -N	-25.32809*	2.18596	1.5296e-09	-33.2099	-17.4463
		pub PUB26T94A #13 +N	-6.426	5.67672	0.989637	-26.8942	14.0421			pub PUB26T94A #13 -N	-23.84152*	2.18596	5.19514e-09	-31.7233	-15.9597
		pub PUB26T94A #18 +N	1.3767	5.67672	1	-19.0914	21.8449			pub PUB26T94A #18 -N	-22.24254*	2.18596	2.05145e-08	-30.1243	-14.3608
		pub PUB26T94D #10 +N	3.09421	5.67672	0.999987	-17.3739	23.5624			pub PUB26T94D #10 -N	-0.827387	2.18596	1	-8.70916	7.05439
		pub PUB26T94D #15 +N	-3.48845	5.67672	0.999958	-23.9566	16.9797			pub PUB26T94D #15 -N	0.551657	2.18596	1	-7.33012	8.43343
	pub PUB26T94D #15 +N	Col-0 +N	-0.219127	5.67672	1	-20.6873	20.249		pub PUB26T94D #15 -N	Col-0 -N	-15.04695*	2.18596	2.2045e-05	-22.9287	-7.16517
		atg1abct +N	3.79477	5.67672	0.999903	-16.6734	24.2629			atg1abct -N	3.73188	2.18596	0.848239	-4.1499	11.6136
		pub25 pub26 +N	2.42283	5.67672	0.999999	-18.0453	22.891			pub25 pub26 -N	-28.31064*	2.18596	1.52836e-10	-36.1924	-20.4289
		pub PUB26 #9 +N	-1.02448	5.67672	1	-21.4926	19.4437			pub PUB26 #9 -N	-14.26983*	2.18596	5.05193e-05	-22.1516	-6.38806
		pub PUB26 #11 +N	-1.87169	5.67672	1	-22.3398	18.5965			pub PUB26 #11 -N	-15.11030*	2.18596	2.06154e-05	-22.9921	-7.22852
		pub PUB26 #14 +N	4.01771	5.67672	0.999832	-16.4504	24.4859			pub PUB26 #14 -N	-14.84523*	2.18596	2.7307e-05	-22.727	-6.96346
		pub PUB26T94A #11 +N	3.7	5.67672	0.999924	-16.7681	24.1682			pub PUB26T94A #11 -N	-25.87975*	2.18596	9.84207e-10	-33.7615	-17.998
		pub PUB26T94A #13 +N	-2.93755	5.67672	0.999992	-23.4057	17.5306			pub PUB26T94A #13 -N	-24.39317*	2.18596	3.28058e-09	-32.2749	-16.5114
		pub PUB26T94A #18 +N	4.86515	5.67672	0.999004	-15.603	25.3333			pub PUB26T94A #18 -N	-22.79420*	2.18596	1.26835e-08	-30.676	-14.9124
		pub PUB26T94D #10 +N	6.58266	5.67672	0.987522	-13.8855	27.0508			pub PUB26T94D #10 -N	-1.37904	2.18596	0.999945	-9.26082	6.50273
		pub PUB26T94D #14 +N	3.48845	5.67672	0.999958	-16.9797	23.9566			pub PUB26T94D #14 -N	-0.551657	2.18596	1	-8.43343	7.33012
									*. The mean difference is significant at the 0.05 level.
	Fig.S18d
			Col-0			pub25 pub26			fer-4			pub25 pub26 fer-4
			R1	R2	R3	R1	R2	R3	R1	R2	R3	R1	R2	R3
		+N	1.26167	1.33363	1.29577	1.35445	1.35749	1.26525	1.08894	1.06022	1.03164	1.03313	1.09073	1.07181
		-N	0.123406	0.13294	0.12508	0.184143	0.177492	0.193371	0.060308	0.070995	0.061648	0.065687	0.053643	0.064284
		+N									-N
		Multiple Comparisons									Multiple Comparisons
		Dependent Variable:	VAR00002								Dependent Variable:	VAR00003
		Tukey HSD									Tukey HSD
		(I) VAR00001		Mean Difference (I-J)	Std. Error	Sig.	95% Confidence Interval				(I) VAR00001		Mean Difference (I-J)	Std. Error	Sig.	95% Confidence Interval
							Lower Bound	Upper Bound								Lower Bound	Upper Bound
		Col-0	pub25 pub26	-0.028705	0.0308887	0.790663	-0.127621	0.0702114			Col-0	pub25 pub26	-.05786*	0.00527216	1.97485e-05	-0.0747433	-0.0409767
			fer-4	.23676*	0.0308887	0.000272651	0.137842	0.335674				fer-4	.06283*	0.00527216	1.06051e-05	0.0459417	0.0797083
			pub25 pub26 fer-4	.23180*	0.0308887	0.000316516	0.132883	0.330716				pub25 pub26 fer-4	.06594*	0.00527216	7.34219e-06	0.049054	0.0828206
		pub25 pub26	Col-0	0.028705	0.0308887	0.790663	-0.0702114	0.127621			pub25 pub26	Col-0	.05786*	0.00527216	1.97485e-05	0.0409767	0.0747433
			fer-4	.26546*	0.0308887	0.000120222	0.166547	0.364379				fer-4	.12069*	0.00527216	6.66953e-08	0.103802	0.137568
			pub25 pub26 fer-4	.26050*	0.0308887	0.000137771	0.161588	0.359421				pub25 pub26 fer-4	.12380*	0.00527216	5.45618e-08	0.106914	0.140681
		fer-4	Col-0	-.23676*	0.0308887	0.000272651	-0.335674	-0.137842			fer-4	Col-0	-.06283*	0.00527216	1.06051e-05	-0.0797083	-0.0459417
			pub25 pub26	-.26546*	0.0308887	0.000120222	-0.364379	-0.166547				pub25 pub26	-.12068*	0.00527216	6.66953e-08	-0.137568	-0.103802
			pub25 pub26 fer-4	-0.00495833	0.0308887	0.998401	-0.103875	0.093958				pub25 pub26 fer-4	0.00311233	0.00527216	0.932221	-0.013771	0.0199956
		pub25 pub26 fer-4	Col-0	-.23180*	0.0308887	0.000316516	-0.330716	-0.132883			pub25 pub26 fer-4	Col-0	-.06594*	0.00527216	7.34219e-06	-0.0828206	-0.049054
			pub25 pub26	-.26050*	0.0308887	0.000137771	-0.359421	-0.161588				pub25 pub26	-.12380*	0.00527216	5.45618e-08	-0.140681	-0.106914
			fer-4	0.00495833	0.0308887	0.998401	-0.093958	0.103875				fer-4	-0.00311233	0.00527216	0.932221	-0.0199956	0.013771
	Fig.S18f
			Col-0			fer-4			PUB25-OX			PUB25-OX/fer-4			PUB26-OX			PUB26-OX/fer-4
			R1	R2	R3	R1	R2	R3	R1	R2	R3	R1	R2	R3	R1	R2	R3	R1	R2	R3
		+N	1.25804	1.26381	1.24523	1.13768	1.14725	1.16809	1.25057	1.2434	1.28875	1.19666	1.20099	1.16263	1.25377	1.22463	1.23045	1.17517	1.14991	1.1583
		-N	0.240586	0.289269	0.269959	0.078609	0.083735	0.071709	0.207368	0.189138	0.182547	0.123115	0.101595	0.126559	0.18027	0.179741	0.199874	0.119558	0.11894	0.110138
		+N									-N
		Multiple Comparisons									Multiple Comparisons
		Dependent Variable:	VAR00002								Dependent Variable:	VAR00002
		Tukey HSD									Tukey HSD
		(I) VAR00001		Mean Difference (I-J)	Std. Error	Sig.	95% Confidence Interval				(I) VAR00001		Mean Difference (I-J)	Std. Error	Sig.	95% Confidence Interval
							Lower Bound	Upper Bound								Lower Bound	Upper Bound
		Col-0	fer-4	.10468*	0.0140283	8.66784e-05	0.0575652	0.151805			Col-0	fer-4	.18859*	0.0112799	1.34814e-08	0.150699	0.226475
			PUB25-OX	-0.00521333	0.0140283	0.998817	-0.0523332	0.0419065				PUB25-OX	.07359*	0.0112799	0.000316184	0.0356987	0.111475
			PUB25-OX/fer-4	.06893*	0.0140283	0.00372023	0.0218102	0.11605				PUB25-OX/fer-4	.14951*	0.0112799	1.89579e-07	0.111627	0.187403
			PUB26-OX	0.0194073	0.0140283	0.735765	-0.0277125	0.0665272				PUB26-OX	.07998*	0.0112799	0.000143021	0.042088	0.117865
			PUB26-OX/fer-4	.09456*	0.0140283	0.000232193	0.0474438	0.141684				PUB26-OX/fer-4	.15039*	0.0112799	1.77503e-07	0.112504	0.188281
		fer-4	Col-0	-.10468*	0.0140283	8.66784e-05	-0.151805	-0.0575652			fer-4	Col-0	-.18859*	0.0112799	1.34814e-08	-0.226475	-0.150699
			PUB25-OX	-.10990*	0.0140283	5.341e-05	-0.157018	-0.0627785				PUB25-OX	-.11500*	0.0112799	3.42173e-06	-0.152888	-0.0771117
			PUB25-OX/fer-4	-0.035755	0.0140283	0.184446	-0.0828748	0.0113648				PUB25-OX/fer-4	-.03907*	0.0112799	0.0419251	-0.0769603	-0.00118371
			PUB26-OX	-.08528*	0.0140283	0.000605699	-0.132398	-0.0381578				PUB26-OX	-.10861*	0.0112799	6.30899e-06	-0.146499	-0.0707224
			PUB26-OX/fer-4	-0.0101213	0.0140283	0.975404	-0.0572412	0.0369985				PUB26-OX/fer-4	-.03819*	0.0112799	0.0477777	-0.0760826	-0.000306043
		PUB25-OX	Col-0	0.00521333	0.0140283	0.998817	-0.0419065	0.0523332			PUB25-OX	Col-0	-.07359*	0.0112799	0.000316184	-0.111475	-0.0356987
			fer-4	.10990*	0.0140283	5.341e-05	0.0627785	0.157018				fer-4	.11500*	0.0112799	3.42173e-06	0.0771117	0.152888
			PUB25-OX/fer-4	.07414*	0.0140283	0.00205046	0.0270235	0.121263				PUB25-OX/fer-4	.07593*	0.0112799	0.000235378	0.0380397	0.113816
			PUB26-OX	0.0246207	0.0140283	0.525063	-0.0224992	0.0717405				PUB26-OX	0.00638933	0.0112799	0.991521	-0.031499	0.0442776
			PUB26-OX/fer-4	.09978*	0.0140283	0.000138712	0.0526572	0.146897				PUB26-OX/fer-4	.07681*	0.0112799	0.000211005	0.0389174	0.114694
		PUB25-OX/fer-4	Col-0	-.06893*	0.0140283	0.00372023	-0.11605	-0.0218102			PUB25-OX/fer-4	Col-0	-.14951*	0.0112799	1.89579e-07	-0.187403	-0.111627
			fer-4	0.035755	0.0140283	0.184446	-0.0113648	0.0828748				fer-4	.03907*	0.0112799	0.0419251	0.00118371	0.0769603
			PUB25-OX	-.07414*	0.0140283	0.00205046	-0.121263	-0.0270235				PUB25-OX	-.07593*	0.0112799	0.000235378	-0.113816	-0.0380397
			PUB26-OX	-.04952*	0.0140283	0.0374941	-0.0966425	-0.00240282				PUB26-OX	-.06954*	0.0112799	0.000533273	-0.107427	-0.0316504
			PUB26-OX/fer-4	0.0256337	0.0140283	0.485166	-0.0214862	0.0727535				PUB26-OX/fer-4	0.000877667	0.0112799	0.999999	-0.0370106	0.038766
		PUB26-OX	Col-0	-0.0194073	0.0140283	0.735765	-0.0665272	0.0277125			PUB26-OX	Col-0	-.07998*	0.0112799	0.000143021	-0.117865	-0.042088
			fer-4	.08528*	0.0140283	0.000605699	0.0381578	0.132398				fer-4	.10861*	0.0112799	6.30899e-06	0.0707224	0.146499
			PUB25-OX	-0.0246207	0.0140283	0.525063	-0.0717405	0.0224992				PUB25-OX	-0.00638933	0.0112799	0.991521	-0.0442776	0.031499
			PUB25-OX/fer-4	.04952*	0.0140283	0.0374941	0.00240282	0.0966425				PUB25-OX/fer-4	.06954*	0.0112799	0.000533273	0.0316504	0.107427
			PUB26-OX/fer-4	.07516*	0.0140283	0.00182953	0.0280365	0.122276				PUB26-OX/fer-4	.07042*	0.0112799	0.000475506	0.032528	0.108305
		PUB26-OX/fer-4	Col-0	-.09456*	0.0140283	0.000232193	-0.141684	-0.0474438			PUB26-OX/fer-4	Col-0	-.15039*	0.0112799	1.77503e-07	-0.188281	-0.112504
			fer-4	0.0101213	0.0140283	0.975404	-0.0369985	0.0572412				fer-4	.03819*	0.0112799	0.0477777	0.000306043	0.0760826
			PUB25-OX	-.09978*	0.0140283	0.000138712	-0.146897	-0.0526572				PUB25-OX	-.07681*	0.0112799	0.000211005	-0.114694	-0.0389174
			PUB25-OX/fer-4	-0.0256337	0.0140283	0.485166	-0.0727535	0.0214862				PUB25-OX/fer-4	-0.000877667	0.0112799	0.999999	-0.038766	0.0370106
			PUB26-OX	-.07516*	0.0140283	0.00182953	-0.122276	-0.0280365				PUB26-OX	-.07042*	0.0112799	0.000475506	-0.108305	-0.032528

[truncated: 1 more sheets: Fig.S19]
