# Supplementary material
Source: Research Square preprint supplement (doi:10.21203/rs.3.rs-9554211/v1)
Supplement: Supplementary file 2 [file 99a659779de1fcf2d13339de.pdf]

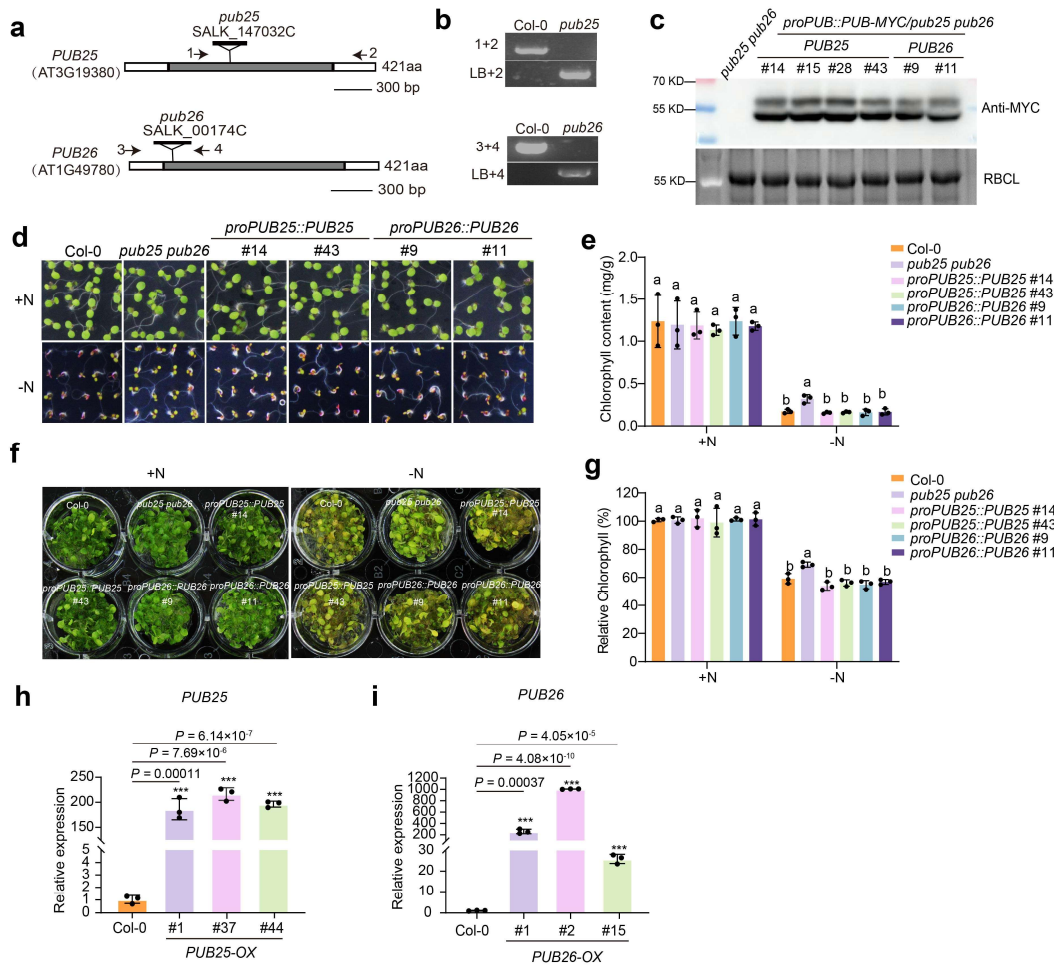

**Supplementary Fig. 1 | Analysis of *pub25* and *pub26* single mutants, genetic complementation of *pub25 pub26* double mutant, and *PUB25/PUB26* overexpression lines.**

**a, b** Genotyping of *pub25* and *pub26* single mutants. Arrows in (a) indicate primer positions; white and black boxes represent untranslated regions (UTRs) and exons, respectively. **c** *PUB25* and *PUB26* protein levels in complementation lines in the *pub25 pub26* double mutant background. Rubisco (RBCL) was used as a loading control. **d** Phenotypes of Col-0 and *pub25 pub26* complementation lines in response to nitrogen starvation. Seedlings were grown on +N or -N medium for 6 days. **e** Chlorophyll content of seedlings from (d). For each biological replicate, at least 64 plants were examined per genotype. Data are mean  $\pm$  SD ( $n = 3$ ). **f** Seedlings of the same genotypes as in (d) were pre-grown on +N medium for 7 days and then incubated in -N liquid

medium for 5 days. **g** Relative chlorophyll content of seedlings from (**f**), normalized to Col-0 under +N conditions (set to 100%). Data are mean  $\pm$  SD ( $n = 3$ ). For panels (**e**, **g**), statistical significance was determined by one-way ANOVA followed by Tukey's multiple comparison test ( $P < 0.05$ ). Different letters denote significant differences. **h**, **i** Transcript levels of *PUB25* and *PUB26* in overexpression lines relative to Col-0. Data represent means  $\pm$  SD ( $n = 3$ ;  $***P < 0.001$ , two-tailed unpaired Student's *t*-test).

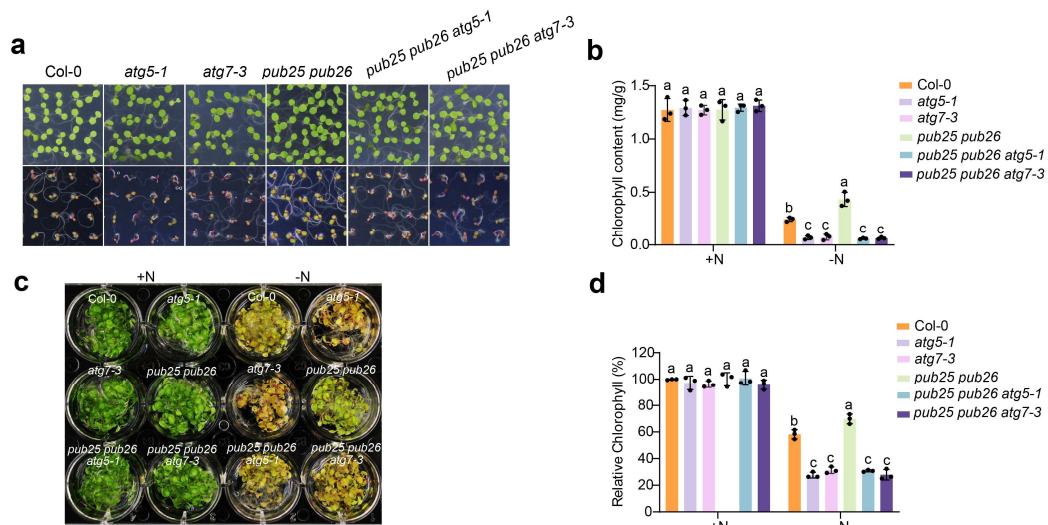

**Supplementary Fig. 2 | Enhanced nitrogen starvation tolerance of *pub25 pub26* requires a functional autophagy pathway.**

**a** Phenotypes of Col-0, *atg5-1*, *atg7-3*, *pub25 pub26*, *pub25 pub26 atg5-1*, and *pub25 pub26 atg7-3* triple mutants in response to nitrogen starvation. Seedlings were grown on +N or -N medium for 6 days. **b** Chlorophyll content of seedlings from (a). For each biological replicate, at least 64 plants were examined per genotype. Data are mean  $\pm$  SD ( $n = 3$ ). **c** Seedlings of the same genotypes as in (a) were pre-grown on +N medium for 7 days and then incubated in -N liquid medium for 5 days. **d** Relative chlorophyll content of seedlings from (c), normalized to Col-0 under +N conditions (set to 100%). Data are mean  $\pm$  SD ( $n = 3$ ). For panels (**b**, **d**), statistical significance was determined by one-way ANOVA followed by Tukey's multiple comparison test ( $P < 0.05$ ).

Different letters denote significant differences.

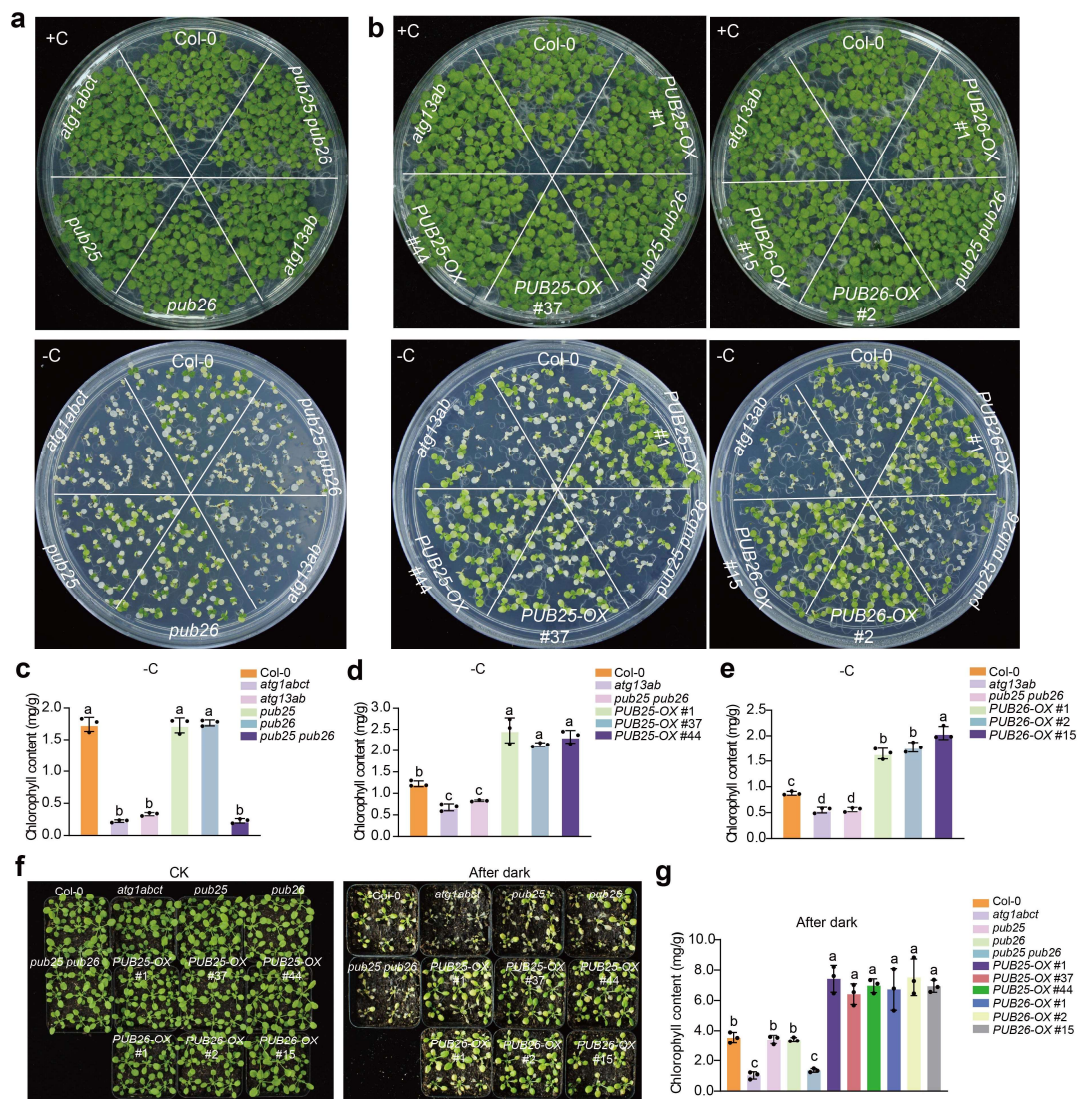

**Supplementary Fig. 3 | PUB25 and PUB26 positively regulate plant tolerance to fixed-carbon starvation.**

**a, b** Phenotypes of *pub25* and *pub26* single mutants, *pub25 pub26* double mutant, and *PUB25*- or *PUB26*-overexpression lines in response to fixed-carbon starvation. Seedlings were grown continuously on sucrose-containing 1/2 MS solid medium under long-day (LD; 16 h light/8 h dark) conditions (carbon-sufficient, +C), or on sucrose-free 1/2 MS solid medium under LD for 7 d, followed by 9-10 d of dark incubation and 3-4 d of recovery under LD (fixed-carbon-starved, -C). **c, d, e** Chlorophyll contents of seedlings in (a) and (b). For each biological replicate, at least 25 plants were examined

per genotype. Data are mean  $\pm$  SD ( $n = 3$ ). **f** Phenotypes of 3-week-old *pub25* and *pub26* single mutants, *pub25 pub26* double mutant, and *PUB25*- or *PUB26*-overexpression lines before and after 7 d of dark incubation. **g** Chlorophyll contents of seedlings in **(f)**. For each biological replicate, at least 8 plants were examined per genotype. Data are mean  $\pm$  SD ( $n = 3$ ). For panels **(c, d, e, g)**, statistical significance was determined by one-way ANOVA followed by Tukey's multiple comparison test ( $P < 0.05$ ). Different letters denote significant differences.

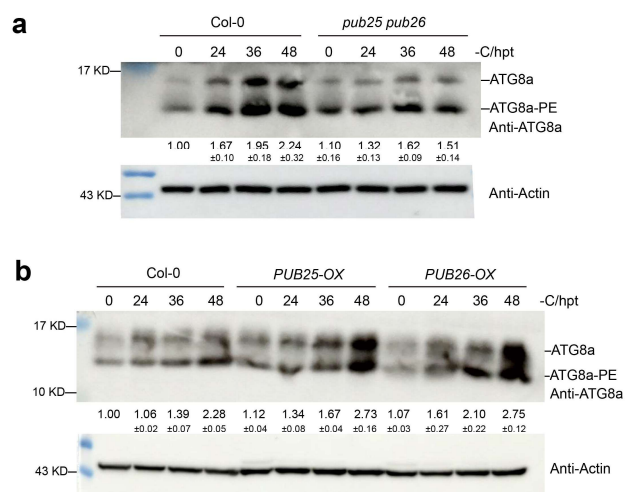

**Supplementary Fig. 4 | ATG8a lipidation levels in Col-0, *pub25 pub26* double mutant, and *PUB25*- or *PUB26*-overexpressing lines under fixed-carbon starvation.**

**a** ATG8a lipidation in Col-0 and *pub25 pub26* double mutant in response to fixed-carbon starvation. **b** ATG8a lipidation in Col-0 and *PUB25*- or *PUB26*-overexpressing lines upon fixed-carbon starvation. ATG8a-PE levels (normalized to actin) are indicated below lanes in **(a, b)**. Data represent mean  $\pm$  SD ( $n = 3$ ). hpt, hours post-treatment.

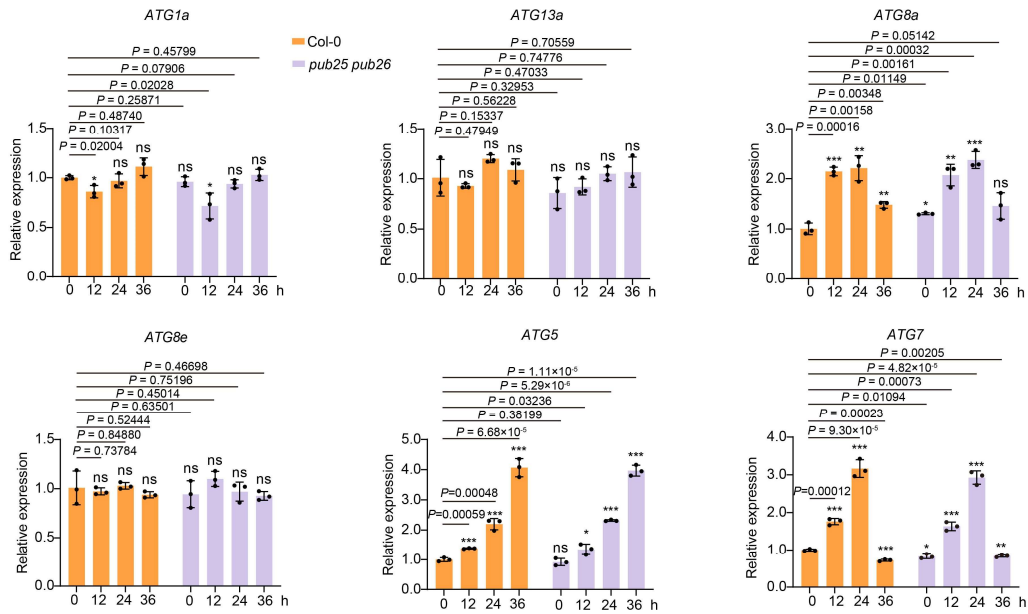

**Supplementary Fig. 5 | Expression of autophagy-related genes (*ATGs*) in Col-0 and *pub25 pub26* double mutant under nitrogen starvation.** Seven-day-old Col-0 and *pub25 pub26* double mutant seedlings were subjected to nitrogen starvation for 0, 12, 24, or 36 h prior to RNA extraction. *Ubiquitin 10 (UBQ10)* was used as the internal control. Expression levels were normalized to Col-0 at 0 h (set to 1). Data represent mean  $\pm$  SD ( $n = 3$ ). Asterisks indicate statistically significant differences compared with Col-0 at 0 h (two-tailed unpaired Student's *t*-test, \* $P < 0.05$ ; \*\* $P < 0.01$ ; \*\*\* $P < 0.001$ ).

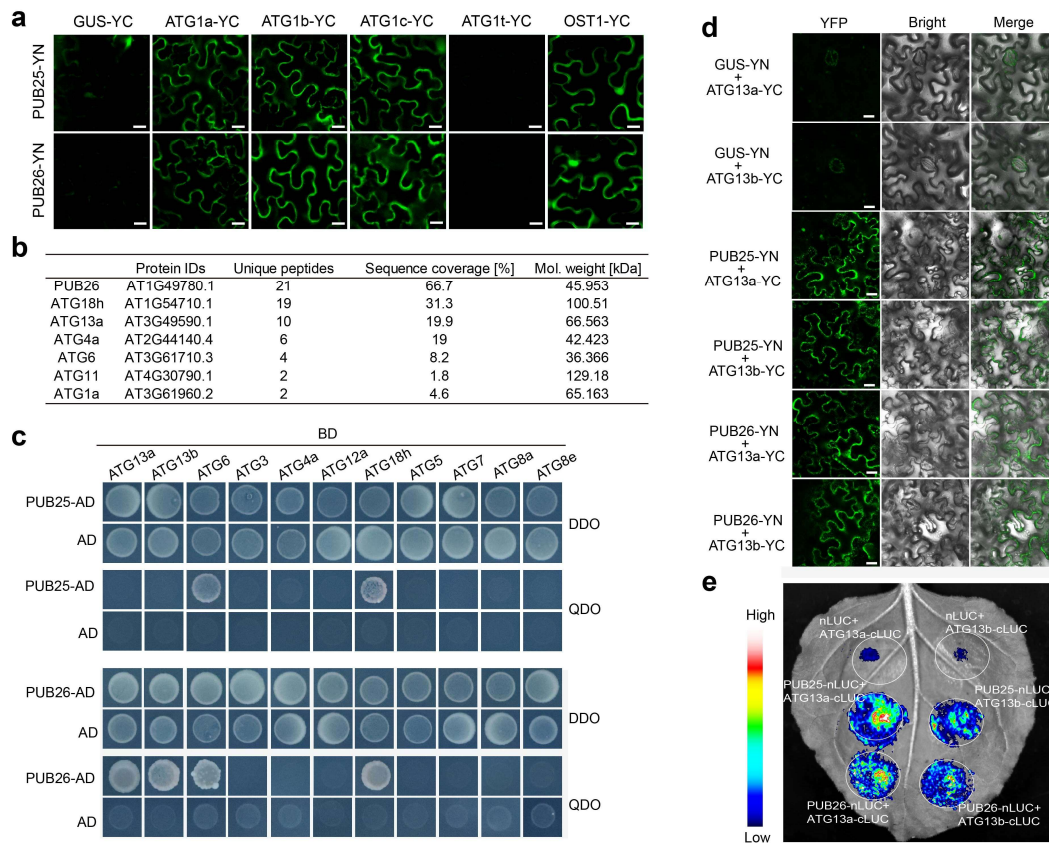

### Supplementary Fig. 6 | PUB25 and PUB26 interact with other ATGs.

**a** Bimolecular fluorescence complementation (BiFC) assays showing that PUB25 and PUB26 interact with ATG1s in *N. benthamiana*. Scale bars, 10  $\mu$ m.  $\beta$ -glucuronidase (GUS) and OST1 were used as the negative and positive controls, respectively. **b** Screening for PUB26-interacting autophagy-related proteins by immunoprecipitation-mass spectrometry (IP-MS) analysis. Total proteins were extracted from *proPUB26::PUB26-MYC/pub25 pub26* seedlings, immunoprecipitated with anti-MYC beads, and subjected to in-gel digestion followed by LC-MS/MS analysis. **c** Interaction of PUB25 and PUB26 with autophagy-related proteins in Y2H assays. **d** BiFC assays showing that PUB25 and PUB26 interact with ATG13s in *N. benthamiana*. Scale bars, 10  $\mu$ m. **e** Split-LUC assays reveal that PUB25 and PUB26 interact with ATG13s.

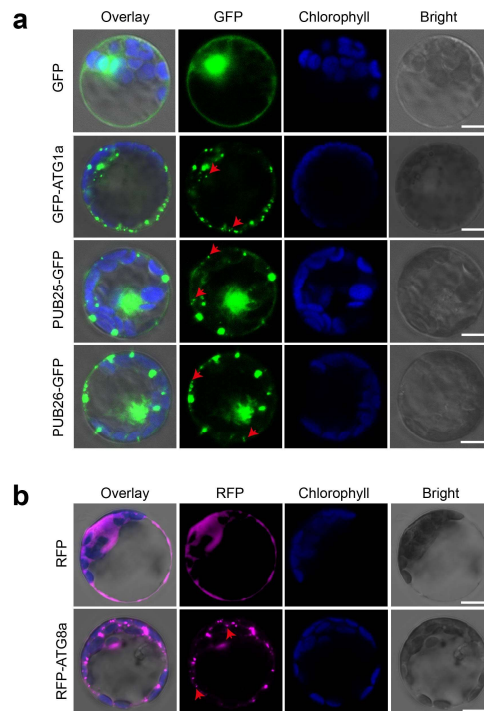

**Supplementary Fig. 7 | Subcellular localization of PUB25, PUB26, ATG1a, and ATG8a in Arabidopsis protoplasts.**

**a** Transient expression of PUB25-GFP, PUB26-GFP, or GFP-ATG1a in Arabidopsis protoplasts. Transformed protoplasts were incubated at 22°C in darkness for 16 h. Free GFP was used as a negative control. Red arrows indicate punctate structures resembling autophagosomes labeled with PUB25-GFP, PUB26-GFP, or GFP-ATG1a. Scale bars, 10 μm. **b** Subcellular localization of RFP-ATG8a in Arabidopsis protoplasts. Free RFP was used as a negative control. Red arrows indicate autophagosomes labeled with RFP-ATG8a. Scale bars, 10 μm.

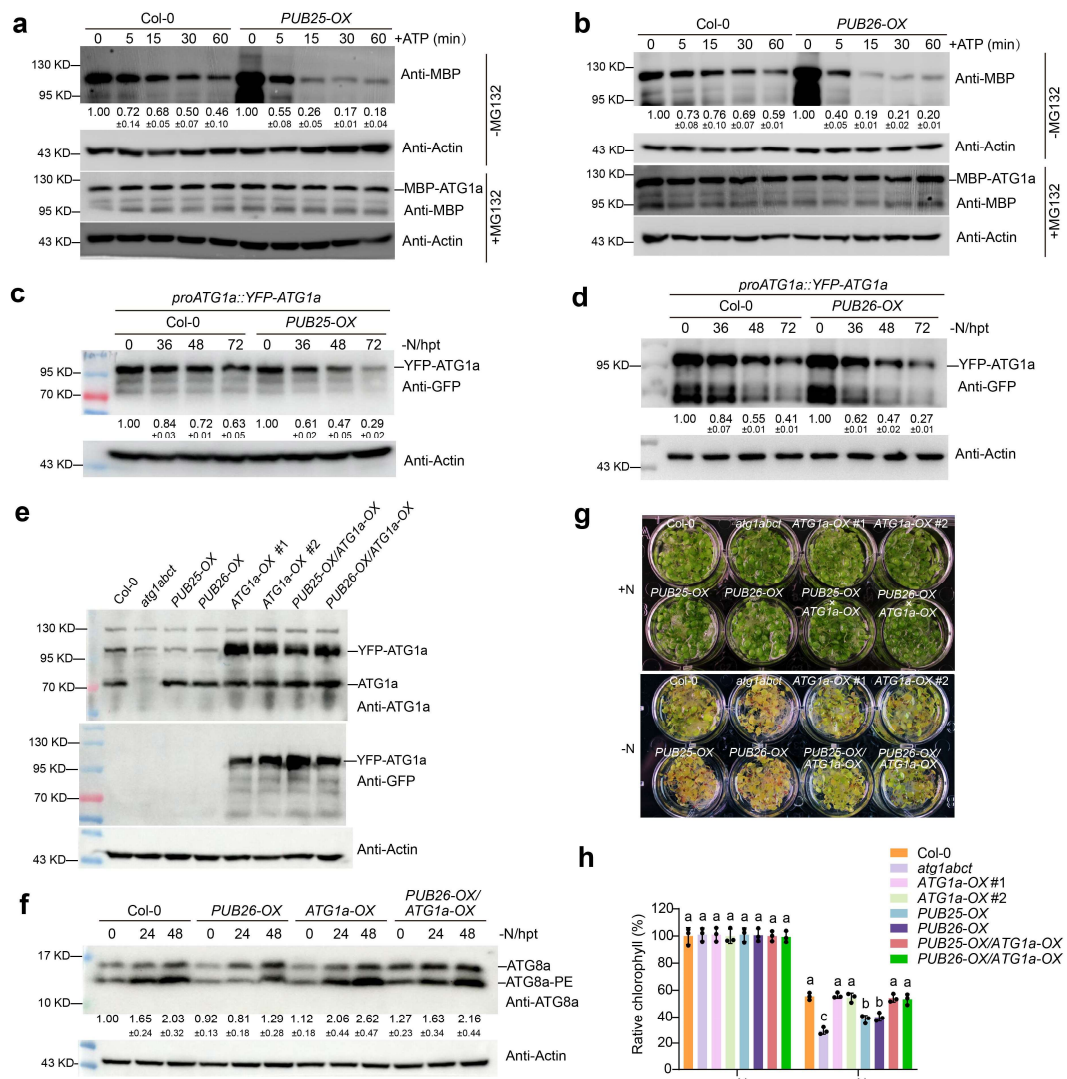

**Supplementary Fig. 8 | PUB25 and PUB26 negatively regulate ATG1a protein stability.**

**a, b** PUB25 and PUB26 promotes ATG1a degradation in cell-free assay. Recombinant MBP-ATG1a was incubated with total protein extracts from Col-0 or *PUB25*- or *PUB26*-overexpression seedlings with or without 5  $\mu$ M MG132, and detected by anti-MBP antibody. Values below lanes indicate MBP-ATG1a levels normalized to actin. Data represent mean  $\pm$  SD ( $n = 3$ ). **c, d** YFP-ATG1a protein levels in Col-0 and *PUB25*- or *PUB26*-overexpressing lines under nitrogen starvation. Values below lanes indicate YFP-ATG1a levels normalized to actin. Data represent mean  $\pm$  SD ( $n = 3$ ). **e** Immunoblot analysis of ATG1a protein levels in Col-0, *atg1abct* quadruple mutant, and

transgenic plants expressing 35S::PUB25-FLAG, 35S::PUB26-FLAG, 35S::YFP-ATG1a, or 35S::YFP-ATG1a together with 35S::PUB25-FLAG and 35S::PUB26-FLAG. **f** Introduction of 35S::YFP-ATG1a into the *PUB25*- or *PUB26*-overexpressing lines restores nitrogen starvation induced autophagy. ATG8a-PE levels (normalized to actin) are indicated below the lanes. Data represent mean  $\pm$  SD ( $n = 3$ ). **g** Introduction of 35S::YFP-ATG1a into the *PUB25*- or *PUB26*-overexpressing lines restores nitrogen starvation tolerance. **h** Relative chlorophyll content of seedlings from (**g**), normalized to Col-0 under +N conditions (set to 100%). Data are mean  $\pm$  SD ( $n = 3$ ; one-way ANOVA with Tukey's multiple comparison test,  $P < 0.05$ ).

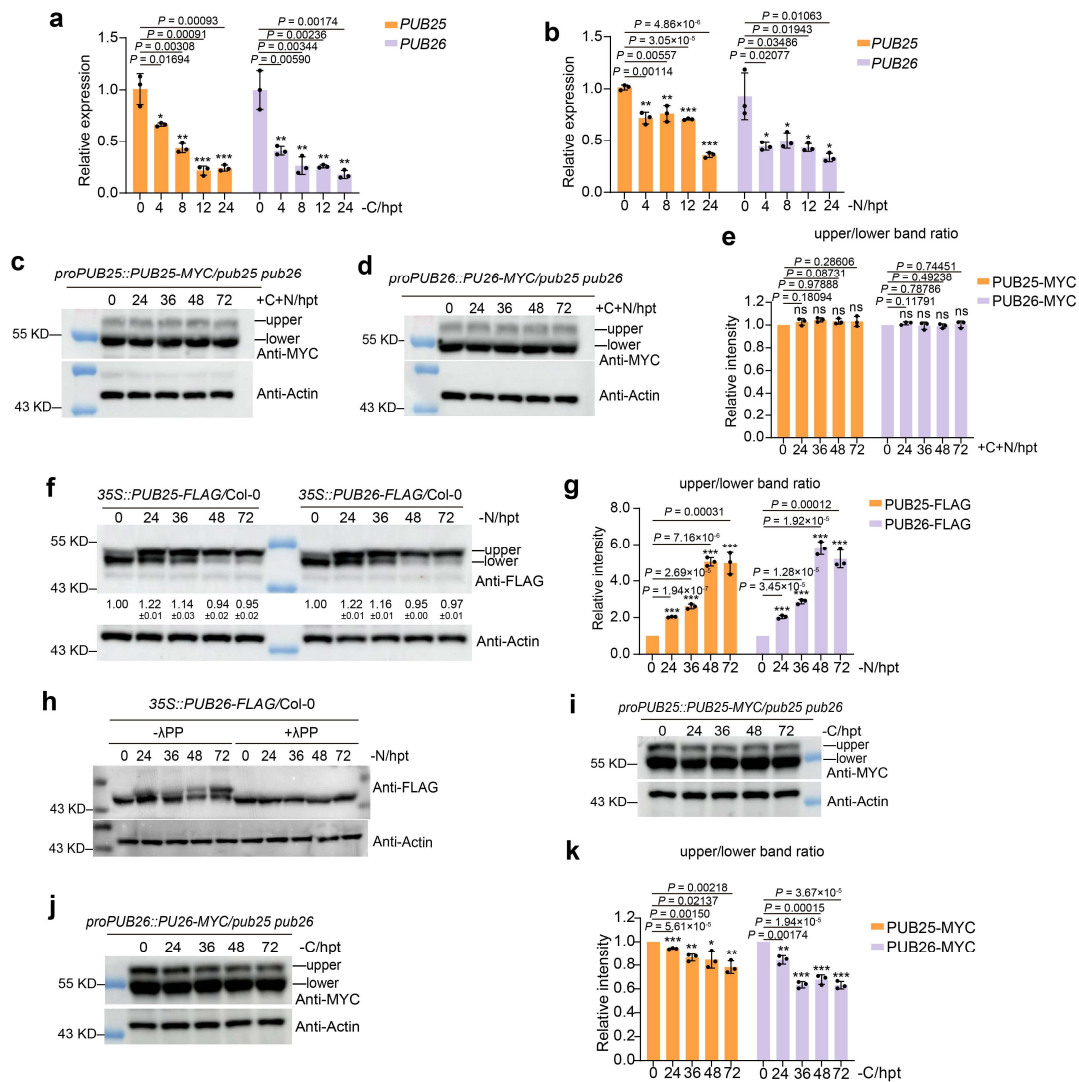

Supplementary Fig. 9 | Nitrogen starvation triggers phosphorylation of PUB25

**and PUB26.**

**a, b** Transcript levels of *PUB25* (**a**) and *PUB26* (**b**) under fixed-carbon starvation and nitrogen starvation. Data represent mean  $\pm$  SD ( $n = 3$ ). Asterisks indicate statistically significant differences compared with 0 h (two-tailed unpaired Student's *t*-test, \* $P < 0.05$ ; \*\* $P < 0.01$ ; \*\*\* $P < 0.001$ ). **c, d** Mobility shift assays of PUB25-MYC (**c**) and PUB26-MYC (**d**) under normal (nutrient-sufficient) conditions. **e** Quantification of the phosphorylated (upper) versus non-phosphorylated (lower) PUB-MYC ratio from (**c**, **d**). Data are mean  $\pm$  SD ( $n = 3$ , two-tailed unpaired Student's *t*-test). **f** Immunoblot analysis of PUB25-FLAG and PUB26-FLAG under nitrogen starvation. Col-0 stably expressing 35S::*PUB25*-FLAG or 35S::*PUB26*-FLAG were subjected to nitrogen starvation; total protein extracts were immunoblotted with anti-FLAG antibody. Numbers below lanes indicate total protein levels of PUB-FLAG normalized to actin (mean  $\pm$  SD,  $n = 3$ ). **g** Quantification of the phosphorylated (upper) versus non-phosphorylated (lower) PUB-FLAG ratio from (**f**). Data are mean  $\pm$  SD ( $n = 3$ , \*\*\* $P < 0.001$ , two-tailed unpaired Student's *t*-test). **h**  $\lambda$ -Phosphatase ( $\lambda$ PP) treatment confirms that the mobility shift in (**f**) is due to phosphorylation. **i, j** Mobility shift analysis of PUB25-MYC (**i**) and PUB26-MYC (**j**) under fixed-carbon starvation. **k** Quantification of the phosphorylated (upper) versus non-phosphorylated (lower) PUB-MYC ratio from (**i, j**). Data are mean  $\pm$  SD ( $n = 3$ , \* $P < 0.05$ ; \*\* $P < 0.01$ ; \*\*\* $P < 0.001$ , two-tailed unpaired Student's *t*-test).

**a** YAS202408050007-1\_PUB26-N, Cmpd 38610, +MSn(571.6308), 37.43 min  
Seq: IPTPKQPADPISVR Mod:3,Phospho[T] 5,GlyGly[K]

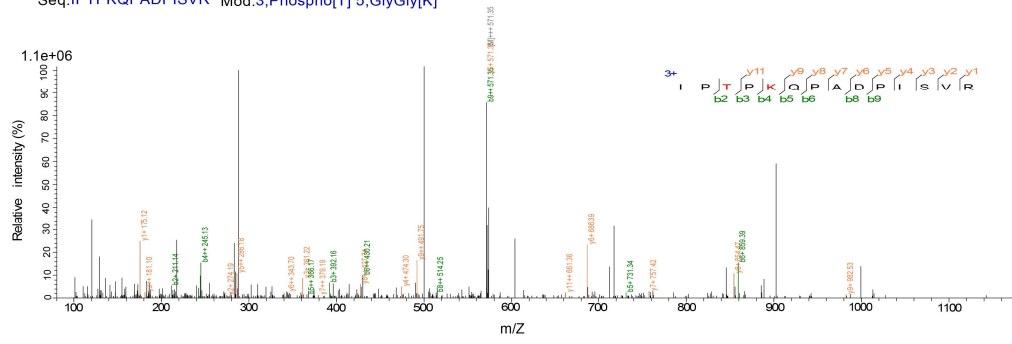

YAS202408050007-1\_PUB26-N, Cmpd 38070, +MSn(658.2493), 36.90 min  
Seq: DSWPDDSTVHSDDFNR Mod:7,Phospho[S]

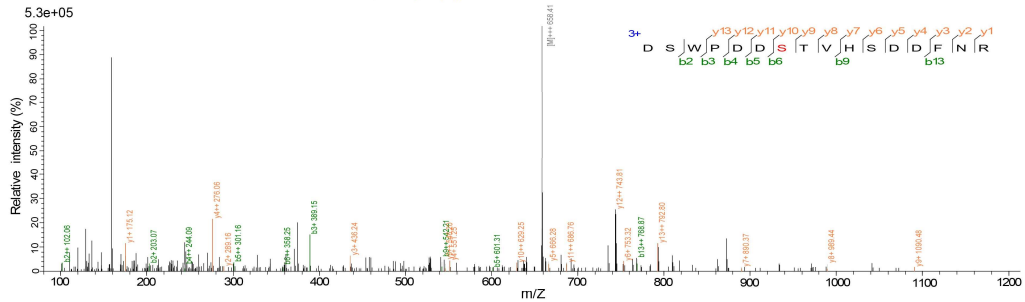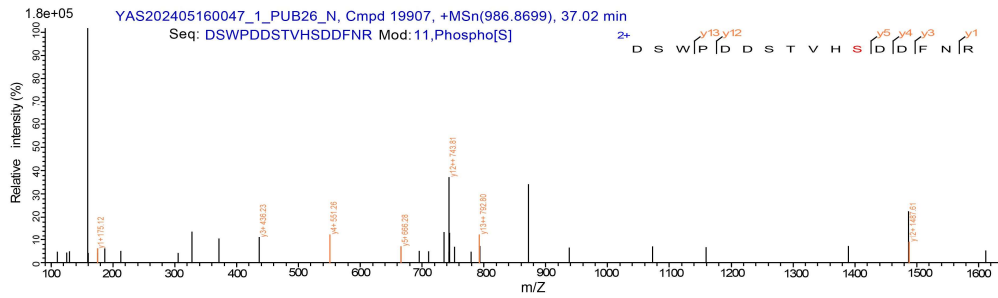

**b**

| Proteins    | Phospho (STY) Probabilities                  | Intensity PUB26+N | Intensity PUB26-N | Positions |
|-------------|----------------------------------------------|-------------------|-------------------|-----------|
| AT1G49780.1 | IPT(1)PKQPADPISVR                            | 8706600           | 24412000          | T94       |
| AT1G49780.1 | DSWPDDS(0.598)T(0.155)VHS(0.247)DDFNR        | 0                 | 35767000          | S406      |
| AT1G49780.1 | DS(0.001)WPDDS(0.009)T(0.009)VHS(0.981)DDFNR | 15288000          | 53248000          | S410      |

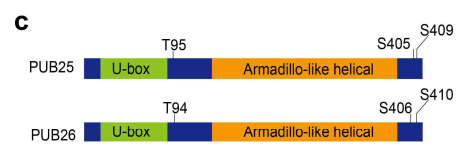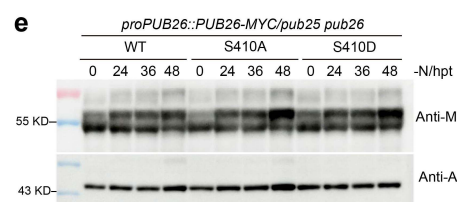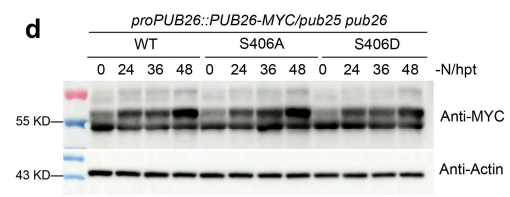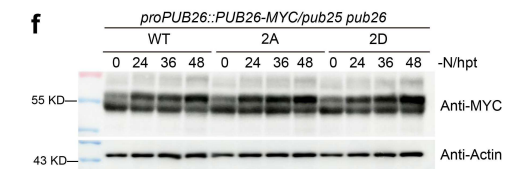

**Supplementary Fig. 10 | Effects of Ser406 and Ser410 mutations on nitrogen starvation-induced PUB26 phosphorylation.**

**a, b** IP-MS analysis of phosphorylated PUB26 peptides under nitrogen starvation. Seedlings of *proPUB26::PUB26-MYC/pub25 pub26* were subjected to nitrogen starvation prior to immunoprecipitation with anti-MYC beads. Affinity-purified proteins were subjected to LC-MS/MS analysis. **c** Schematic diagram showing the identified phosphorylation sites in PUB26 and the corresponding conserved residues in PUB25. **d, e, f** Effects of Ser406 and Ser410 mutations on nitrogen starvation-induced PUB26 phosphorylation. The *pub25 pub26* double mutant expressing PUB26-MYC variants with single-site mutations (S406A/S406D/S410A/S410D) or combined mutations (2A, S406A/S410A; 2D, S406D/S410D) driven by PUB26 native promoter were subjected to nitrogen starvation for various durations. Total proteins were extracted and immunodetected using anti-MYC antibody. hpt, hours post-treatment.

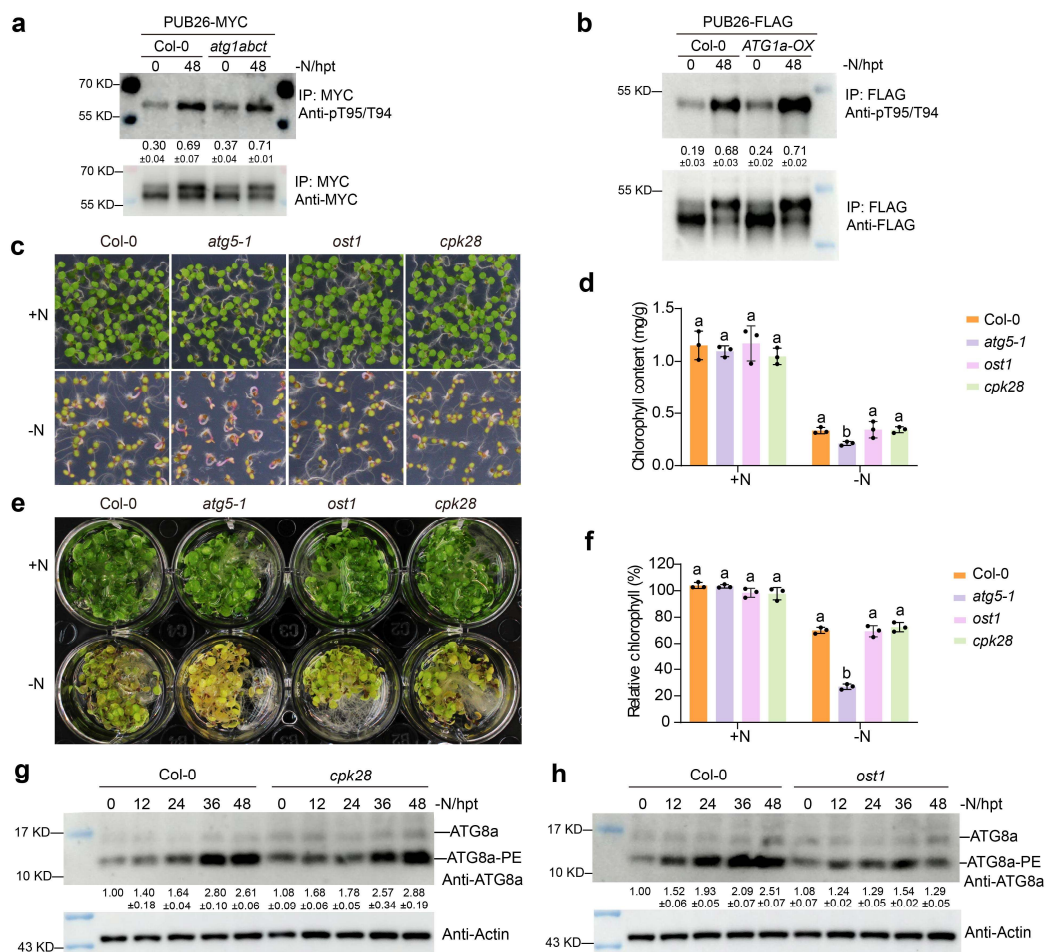

**Supplementary Fig. 11 | Effect of ATG1 kinase on nitrogen starvation-induced**

**phosphorylation of PUB26 at Thr94, and nitrogen starvation-induced autophagy in *ost1* and *cpk28* mutants.**

**a, b** Thr94 phosphorylation of PUB26 in Col-0, *atglabct* mutant, and *ATG1a* overexpression lines under nitrogen starvation. Transgenic plants expressing 35S::PUB26-MYC (**a**) or 35S::PUB26-FLAG (**b**) were subjected to nitrogen starvation. Proteins were immunoprecipitated with anti-MYC beads (**a**) or anti-FLAG beads (**b**) and probed with anti-pT95/T94 antibody. Values below lanes indicate the relative Thr94 phosphorylation signal normalized to immunoprecipitated PUB26-MYC or PUB26-FLAG levels. Data are mean  $\pm$  SD ( $n = 3$ ). **c** Phenotypes of Col-0, *ost1*, and *cpk28* mutants in response to nitrogen starvation. Seedlings were grown on +N or -N medium for 6 days. **d** Chlorophyll content of seedlings from (**c**). For each biological replicate, at least 64 plants were examined per genotype. **e** Phenotypes of the same genotypes as in (**c**) after transfer to -N liquid medium. Seedlings were pre-grown on +N medium for 7 days and then incubated in -N liquid medium for 5 days. **f** Relative chlorophyll content of seedlings from (**e**), normalized to Col-0 under +N conditions (set to 100%). For (**d, f**), data are mean  $\pm$  SD ( $n = 3$ ), one-way ANOVA with Tukey's multiple comparison test ( $P < 0.05$ ). **g, h** Immunoblot analysis of ATG8a lipidation in Col-0, *ost1*, and *cpk28* under nitrogen starvation. ATG8a-PE levels (normalized to actin) are indicated below the lanes. Data are mean  $\pm$  SD ( $n = 3$ ).

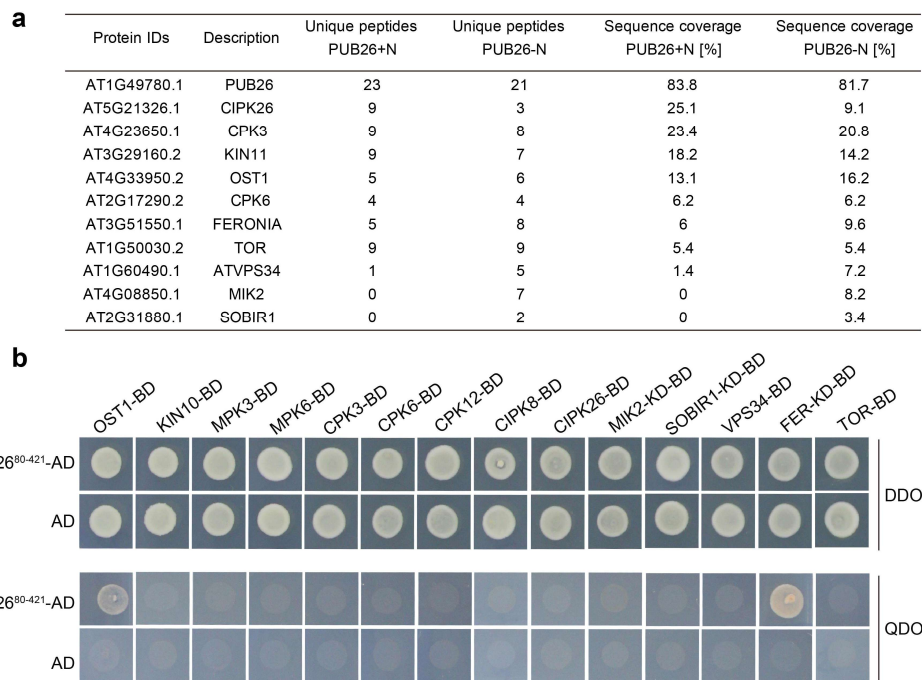

**Supplementary Fig. 12 | Screen for kinases potentially interacting with PUB26.**

**a** IP-MS analysis to screen for kinases potentially interacting with PUB26 under +N or -N conditions. Transgenic plants *proPUB26::PUB26-MYC/pub25 pub26* were subjected to N-rich and N-starvation treatments, total proteins were extracted, followed by immunoprecipitation with anti-MYC-beads, and the products were analyzed by LC-MS/MS. **b** Y2H assay showing interactions between truncated PUB26 (PUB26<sup>80-421</sup>) and various kinases. For transmembrane receptors MIK2, SOBIR1, and FERONIA, their intracellular kinase domains (KDs) were used for the interaction assay. OST1 was used as a positive control.

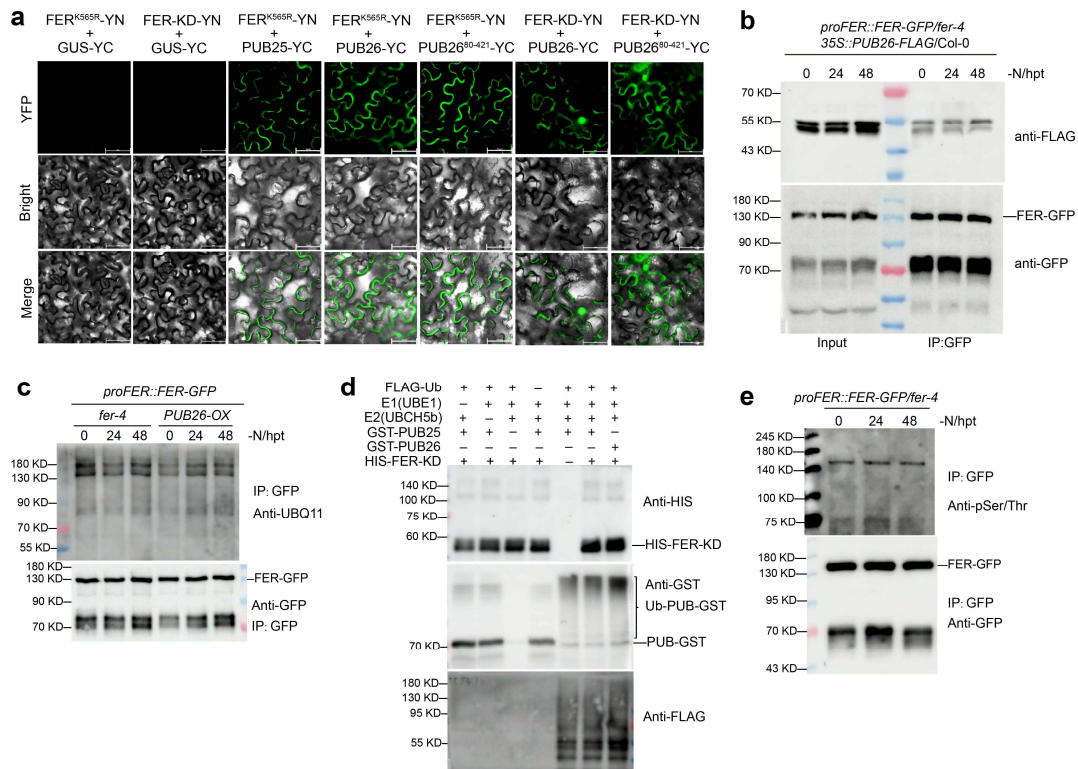

**Supplementary Fig. 13 | FERONIA interacts with PUB25 and PUB26, and is not ubiquitinated by PUB25 or PUB26.**

**a** BiFC assays confirm interactions between PUB25 and PUB26 (or their truncated versions) and either the full-length kinase-dead variant FER<sup>K565R</sup> (wild-type FER induces severe cell death in transiently transformed *N. benthamiana* leaf cells, so the kinase-dead K565R mutant was used instead) or the truncated FER-KD. GUS-YC served as a negative control. Scale bars = 50  $\mu$ m. **b** Co-IP assay to detect the interaction between PUB26 and FER under nitrogen starvation conditions. Total proteins were extracted from Arabidopsis lines co-expressing FER-GFP and PUB26-FLAG following nitrogen starvation for the indicated times. hpt, hours post-treatment. **c** Ubiquitination levels of FER in *fer-4* and *PUB26-OX* backgrounds under nitrogen starvation. Total protein extracts were isolated from nitrogen-starved *proFER::FER-GFP/fer-4* and *proFER::FER-GFP/PUB26-OX* seedlings, followed by immunoprecipitation with anti-GFP beads, and detected by anti-UBQ11 antibody. **d** In vitro ubiquitination assay of the

FER kinase domain (FER-KD) by PUB25 and PUB26. Reaction mixtures were incubated with 10 mM ATP at 37°C for 5 h. Ubiquitination was detected with the indicated antibodies. **e** Immunoblot analysis of FER phosphorylation under nitrogen starvation. Total protein extracts were isolated from nitrogen-starved *proFER::FER-GFP/fer-4* seedlings, followed by immunoprecipitation with anti-GFP beads and detected via immunoblotting using anti-pSer/Thr antibody.

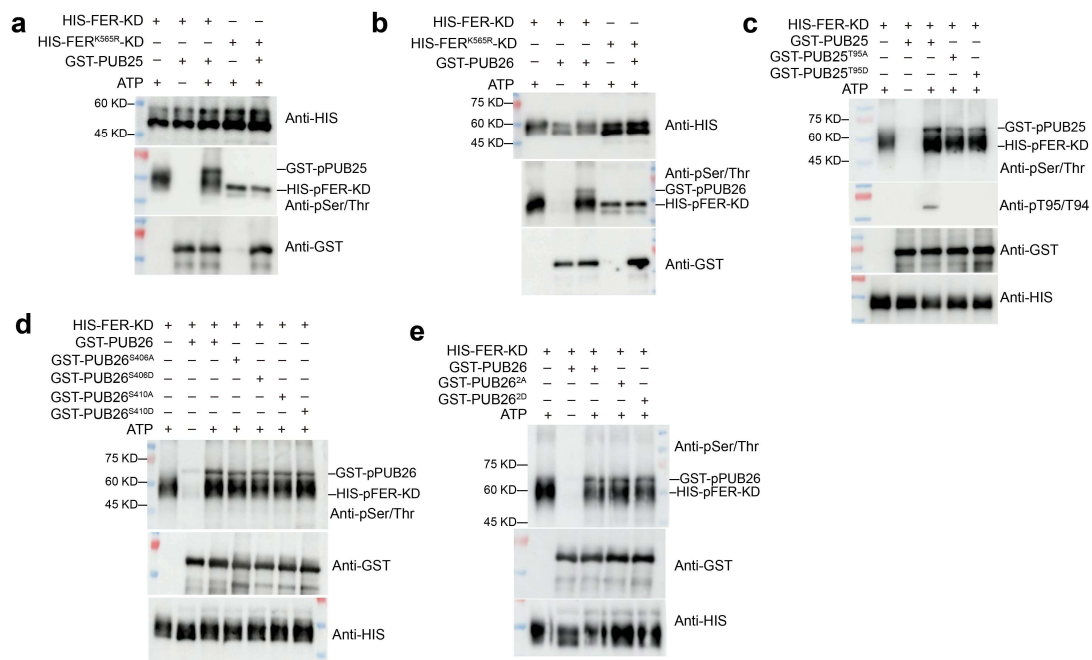

**Supplementary Fig. 14 | FERONIA phosphorylates PUB25 and PUB26 in vitro.**

**a, b** In vitro phosphorylation of PUB25 and PUB26 by FER-KD and kinase-dead FER<sup>K565R</sup>-KD. Recombinant proteins were incubated in phosphorylation reaction buffer containing 1 mM ATP at 30°C for 30 min. Phosphorylated proteins were detected by anti-pSer/Thr antibody. **c** In vitro phosphorylation of PUB25 Thr94 variants by FER-KD. Phosphorylated proteins were detected by anti-pSer/Thr antibody and anti-pT95/T94 antibody. **d, e** In vitro phosphorylation of PUB26 Ser406/Ser410 variants by FER-KD. Phosphorylated proteins were detected by anti-pSer/Thr antibody. 2A (S406A/S410A), 2D (S406D/S410D).

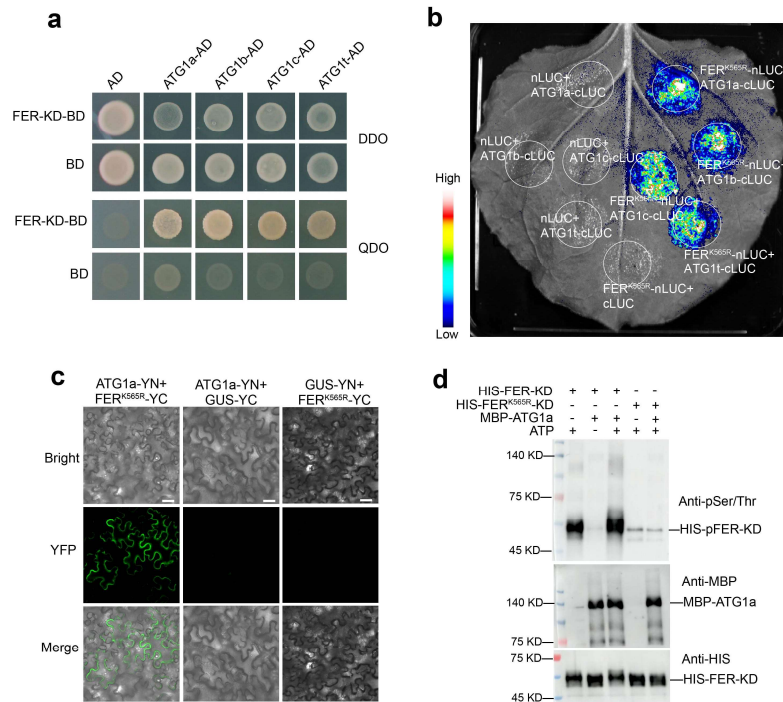

**Supplementary Fig. 15 | FERONIA interacts with but does not phosphorylate ATG1.**

**a** Y2H assay showing interactions between the FER kinase domain (FER-KD) and ATG1s (ATG1a, ATG1b, ATG1c). **b** Split-LUC assays confirm interactions between the FER functional variant FER<sup>K565R</sup> and ATG1s. **c** BiFC assays of the interactions between the FER functional variants FER<sup>K565R</sup> and ATG1a. GUS-YN and GUS-YC served as negative controls. Scale bars = 10  $\mu$ m. **d** In vitro phosphorylation of ATG1a by FER-KD and kinase-dead FER<sup>K565R</sup>-KD. Phosphorylated proteins were detected by anti-pSer/Thr antibody.

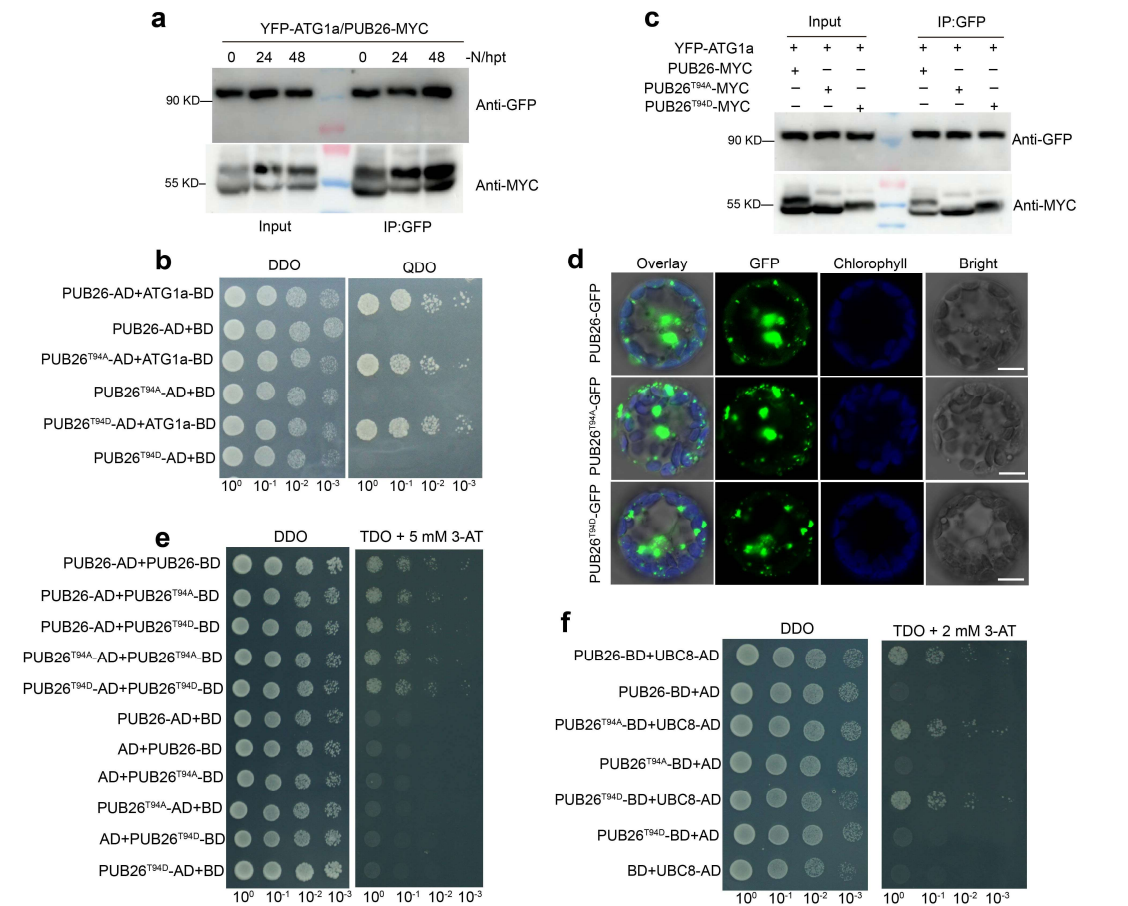

**Supplementary Fig. 16 | Effects of PUB26 phosphorylation on its interaction with substrate ATG1a, subcellular localization, dimerization, and interaction with the E2 enzyme (UBC8).**

**a** Co-IP assay to detect the interaction between PUB26 and ATG1a under nitrogen starvation conditions. Total proteins were extracted from transgenic plant co-expressing YFP-ATG1a and PUB26-MYC following nitrogen starvation for the indicated times. hpt, hours post-treatment. **b** Y2H assay to detect the interaction between ATG1a and PUB26 variants (wild-type, T94A, and T94D). **c** Co-IP assay of PUB26 variants (wild-type, T94A, and T94D) with ATG1a. Total proteins were extracted from Arabidopsis co-expressing PUB26-MYC, PUB26<sup>T94A</sup>-MYC or PUB26<sup>T94D</sup>-MYC with YFP-ATG1a following nitrogen starvation. hpt, hours post-treatment. **d** Subcellular localization of PUB26 Thr94 variants in protoplasts isolated from *pub25 pub26* double mutant. Scale

bars, 10  $\mu\text{m}$ . **e** Y2H assay to analyze the effect of Thr94 phosphorylation on PUB26 dimerization using PUB26 variants (WT, T94A, T94D). **f** Y2H assay to analyze the effect of Thr94 phosphorylation on PUB26-UBC8 interaction using PUB26 variants (WT, T94A, T94D).

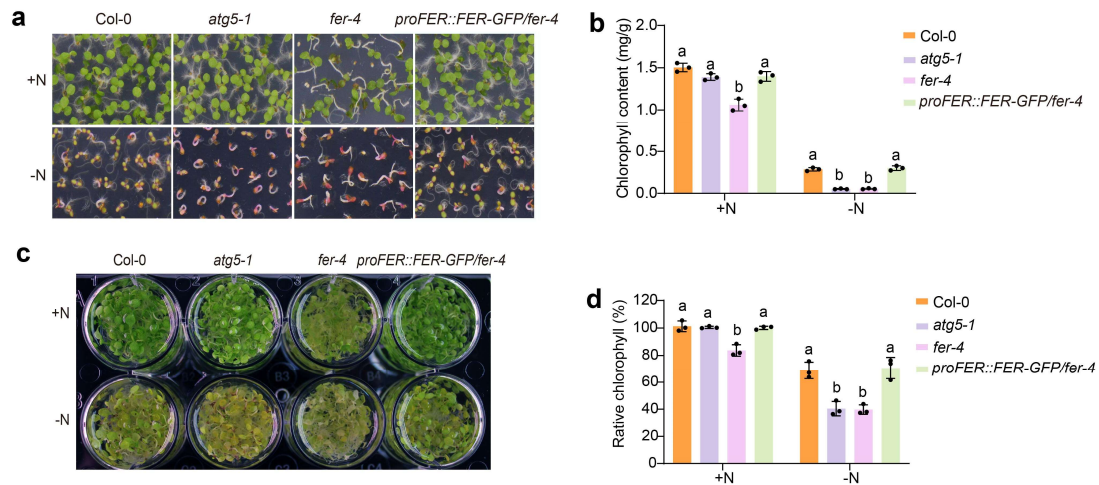

**Supplementary Fig. 17 | Loss of FER function confers hypersensitivity to nitrogen starvation in plants.**

**a** Phenotypes of Col-0, *atg5-1*, *fer-4*, and *proFER::FER-GFP/fer-4* seedlings in response to nitrogen starvation. Seedlings were grown on +N or -N medium for 6 days.

**b** Chlorophyll content of seedlings from (a). Data are mean  $\pm$  SD ( $n = 3$ ). For each biological replicate, at least 64 plants were examined per genotype.

**c** Phenotypes of the same genotypes as in (a) after transfer to -N liquid medium. Seedlings were pre-grown on +N medium for 7 days and then incubated in -N liquid medium for 3 days.

**d** Relative chlorophyll content of seedlings from (c), normalized to Col-0 under +N conditions (set to 100%). Data are mean  $\pm$  SD ( $n = 3$ ). For (b, d), statistical significance was determined by one-way ANOVA followed by Tukey's multiple comparison test ( $P < 0.05$ ).

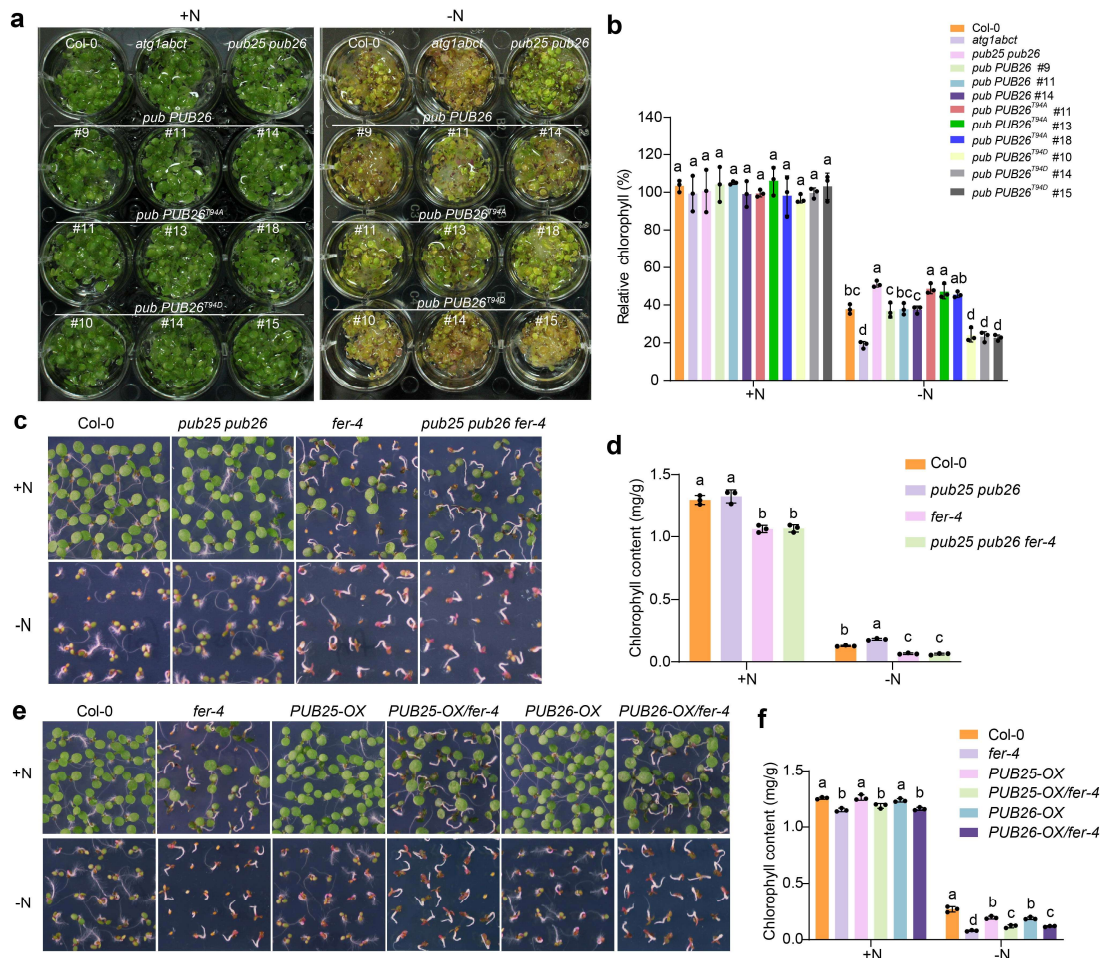

**Supplementary Fig. 18 | FERONIA-mediated phosphorylation of PUB26 negatively regulates nitrogen starvation-induced plant autophagy.**

**a** PUB26 Thr94 phosphorylation enhances plant sensitivity to nitrogen starvation. Seedlings of the indicated genotypes pre-grown on +N medium for 7 days and then incubated in -N liquid medium for 5 days. **b** Relative chlorophyll content of seedlings from (a), normalized to Col-0 under +N conditions (set to 100%). Data are mean  $\pm$  SD ( $n = 3$ ). **c** Phenotypes of Col-0, *pub25 pub26*, *fer-4* and *pub25 pub26 fer-4* triple mutant under nitrogen starvation. Seedlings were grown on +N or -N medium for 6 days. **d** Chlorophyll content of seedlings from (c). Data are mean  $\pm$  SD ( $n = 3$ ). For each biological replicate, at least 64 plants were examined per genotype. **e** Phenotypes of Col-0, *fer-4*, *PUB25-OX*, *PUB26-OX*, *PUB25-OX/fer-4*, and *PUB26-OX/fer-4* plants under nitrogen starvation. **f** Chlorophyll content of seedlings from (e). Data are mean  $\pm$

SD ( $n = 3$ ). For **(b, d, f)**, statistical significance was determined by one-way ANOVA followed by Tukey's multiple comparison test ( $P < 0.05$ ).

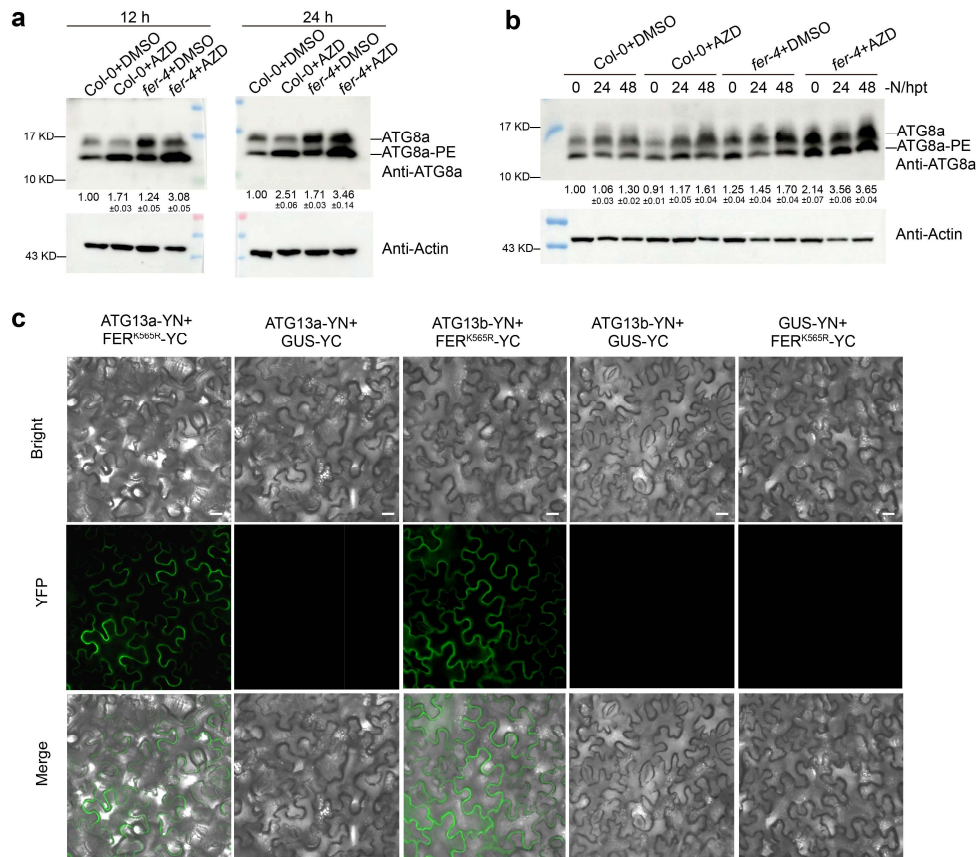

**Supplementary Fig. 19 | FER suppresses autophagy through partially TOR-independent pathways, and FER interacts with ATG13.**

**a, b** AZD8055 treatment enhances ATG8a lipidation in the *fer-4* mutant. Total proteins were extracted from Col-0 and *fer-4* seedlings treated with DMSO or AZD8055 (1  $\mu$ M), and analyzed by anti-ATG8a antibody. ATG8a-PE levels normalized to actin are shown below lanes. Data are mean  $\pm$  SD ( $n = 3$ ). **c** BiFC assays of the interactions between the FER functional variants FER<sup>K565R</sup> and ATG13. GUS-YN and GUS-YC served as negative controls. Scale bars = 10  $\mu$ m.
