# Supplementary material
Source: Research Square preprint supplement (doi:10.21203/rs.3.rs-9554211/v1)
Supplement: Supplementary file 4 [file 3552ea0c4e2e848a8bd37caf.xlsx]

## Sheet: Sheet1
	#1. Comparative quantitative phosphoproteomics of WT and fer-4 mutant. (Current biology, Liu et al., 2026)
	Protein	Annotation	Localization prob	Phospho (STY) Probabilities	WT-1	WT-2	WT-3	fer-4-1	fer-4-2	fer-4-3
	AT3G49590.1	AT3G49590.1 Autophagy-related protein 13 | chr3:18377892-18380104 FORWARD LENGTH=603;AT3G49590.2 Autophagy-related protein 13 | chr3:18377892-18380104 FORWARD LENGTH=603;AT3G49590.3 Autophagy-related protein 13 | c	0.827268	FAFS(0.151)RS(0.827)PS(0.022)R	1.081	1.25887	1.0803	1.0245	0.872046	0.982812
	AT3G49590.1	AT3G49590.1 Autophagy-related protein 13 | chr3:18377892-18380104 FORWARD LENGTH=603;AT3G49590.2 Autophagy-related protein 13 | chr3:18377892-18380104 FORWARD LENGTH=603;AT3G49590.3 Autophagy-related protein 13 | c	0.707744	FAFS(0.009)RS(0.283)PS(0.708)R	0	0	0	0	0	0
	AT3G49590.1	AT3G49590.1 Autophagy-related protein 13 | chr3:18377892-18380104 FORWARD LENGTH=603;AT3G49590.2 Autophagy-related protein 13 | chr3:18377892-18380104 FORWARD LENGTH=603;AT3G49590.3 Autophagy-related protein 13 | c	1	FFPS(1)PGR	1.11191	1.1526	1.08658	0.926226	0.742767	1.00607
	AT3G49590.1	AT3G49590.1 Autophagy-related protein 13 | chr3:18377892-18380104 FORWARD LENGTH=603;AT3G49590.2 Autophagy-related protein 13 | chr3:18377892-18380104 FORWARD LENGTH=603;AT3G49590.3 Autophagy-related protein 13 | c	0.998246	IITDY(0.001)VGS(0.998)PAT(0.001)DPMR	0.975334	1.4222	1.18618	1.01752	0.736269	1.07697
	AT3G49590.1	AT3G49590.1 Autophagy-related protein 13 | chr3:18377892-18380104 FORWARD LENGTH=603;AT3G49590.2 Autophagy-related protein 13 | chr3:18377892-18380104 FORWARD LENGTH=603;AT3G49590.3 Autophagy-related protein 13 | c	1	NPLPPFS(1)PK	1.15898	1.11472	1.09458	0.904495	0.844588	0.957444
	AT3G49590.1	AT3G49590.1 Autophagy-related protein 13 | chr3:18377892-18380104 FORWARD LENGTH=603;AT3G49590.2 Autophagy-related protein 13 | chr3:18377892-18380104 FORWARD LENGTH=603;AT3G49590.3 Autophagy-related protein 13 | c	0.997007	RS(0.997)PS(0.002)S(0.001)QDSLPGIALYR	0	0	0	0	0	0
	AT3G49590.1	AT3G49590.1 Autophagy-related protein 13 | chr3:18377892-18380104 FORWARD LENGTH=603;AT3G49590.2 Autophagy-related protein 13 | chr3:18377892-18380104 FORWARD LENGTH=603;AT3G49590.3 Autophagy-related protein 13 | c	0.750633	S(0.036)GES(0.751)PS(0.214)GLMNQYPTQK	1.3647	1.45529	1.25448	0.819856	0.689599	0.826745
	AT3G49590.1	AT3G49590.1 Autophagy-related protein 13 | chr3:18377892-18380104 FORWARD LENGTH=603;AT3G49590.2 Autophagy-related protein 13 | chr3:18377892-18380104 FORWARD LENGTH=603;AT3G49590.3 Autophagy-related protein 13 | c	0.91958	S(0.015)GES(0.065)PS(0.92)GLMNQYPTQK	1.25409	1.32567	1.20661	0.878677	0.734194	0.861681
	AT3G49590.1	AT3G49590.1 Autophagy-related protein 13 | chr3:18377892-18380104 FORWARD LENGTH=603;AT3G49590.2 Autophagy-related protein 13 | chr3:18377892-18380104 FORWARD LENGTH=603;AT3G49590.3 Autophagy-related protein 13 | c	0.998782	SVEGHS(0.999)FT(0.001)GR	1.23499	1.1766	1.35123	1.19672	0.930729	1.21482
	AT3G49590.1	AT3G49590.1 Autophagy-related protein 13 | chr3:18377892-18380104 FORWARD LENGTH=603;AT3G49590.2 Autophagy-related protein 13 | chr3:18377892-18380104 FORWARD LENGTH=603;AT3G49590.3 Autophagy-related protein 13 | c	1	YISGGNS(1)PR	1.27388	1.35128	1.35999	1.07058	0.805831	1.06845
	AT3G49590.1	AT3G49590.1 Autophagy-related protein 13 | chr3:18377892-18380104 FORWARD LENGTH=603;AT3G49590.2 Autophagy-related protein 13 | chr3:18377892-18380104 FORWARD LENGTH=603;AT3G49590.3 Autophagy-related protein 13 | c	0.790524	YVS(0.791)S(0.169)NFS(0.041)EPGR	0	0	0	0	0	0
	#2. Identification of proteins with reduced phosphorylation levels in the fer-4 mutant using in vivo quantitative phosphoproteomics assay. (Plant Cell, Jiang et al., 2024)
	Protein	Localization probability	Score	Sequence window	Modification window	Peptide window coverage	Phospho (STY) Probabilities	Phospho (STY) Score	Position in peptide	Charge	WT-1 Intensity	WT-2 Intensity	WT-3 Intensity	fer-4-1 Intensity	fer-4-2 Intensity	fer-4-3 Intensity	Fold change WT vs fer-4	P value WT vs fer-4
	AT3G49590.1 | Symbols: | Autophagy-related protein 13 | chr3:18377892-18380104 FORWARD LENGTH=603;AT3G49590.2 | Symbols: | Autophagy-related protein 13 | chr3:18377892-18380104 FORWARD LENGTH=603;AT3G49590.3 | Symbols: | Autophagy-related protein 13 | c	0.750633	5.45602	SLPGIALYRSSRSGESPSGLMNQYPTQKLSK	X;X;X;X;X;X;X;X;X;X;X;X;X;X;X;Phospho (STY);X;X;X;X;Oxidation (M);X;X;X;X;X;X;X;X;X;X	XXXXXXXXXXXXPPPPPPPPPPPPPPPPXXX	S(0.036)GES(0.751)PS(0.214)GLMNQYPTQK	S(-13.23)GES(5.46)PS(-5.46)GLMNQY(-115.06)PT(-132.11)QK	4	3	1.3647	1.45529	1.25448	0.819856	0.689599	0.826745	1.74406	0.0017949
	AT3G49590.1 | Symbols: | Autophagy-related protein 13 | chr3:18377892-18380104 FORWARD LENGTH=603;AT3G49590.2 | Symbols: | Autophagy-related protein 13 | chr3:18377892-18380104 FORWARD LENGTH=603;AT3G49590.3 | Symbols: | Autophagy-related protein 13 | c	0.91958	11.4876	PGIALYRSSRSGESPSGLMNQYPTQKLSKDS	X;X;X;X;X;X;X;X;X;X;X;X;X;X;X;Phospho (STY);X;X;Oxidation (M);X;X;X;X;X;X;X;X;X;X;X;X	XXXXXXXXXXPPPPPPPPPPPPPPPPXXXXX	S(0.015)GES(0.065)PS(0.92)GLMNQYPTQK	S(-17.84)GES(-11.49)PS(11.49)GLMNQY(-74.9)PT(-94.66)QK	6	3	1.25409	1.32567	1.20661	0.878677	0.734194	0.861681	1.53012	0.00208047
	AT3G49590.1 | Symbols: | Autophagy-related protein 13 | chr3:18377892-18380104 FORWARD LENGTH=603;AT3G49590.2 | Symbols: | Autophagy-related protein 13 | chr3:18377892-18380104 FORWARD LENGTH=603;AT3G49590.3 | Symbols: | Autophagy-related protein 13 | c	1	68.539	PSGSPSTPRYISGGNSPRINVRPGTAPVTIP	X;X;X;X;X;X;X;X;X;X;X;X;X;X;X;Phospho (STY);X;X;X;X;X;X;X;X;X;X;X;X;X;X;X	XXXXXXXXXPPPPPPPPPXXXXXXXXXXXXX	YISGGNS(1)PR	Y(-77.25)IS(-68.54)GGNS(68.54)PR	7	2	1.27388	1.35128	1.35999	1.07058	0.805831	1.06845	1.35325	0.0482052
	AT3G49590.1 | Symbols: | Autophagy-related protein 13 | chr3:18377892-18380104 FORWARD LENGTH=603;AT3G49590.2 | Symbols: | Autophagy-related protein 13 | chr3:18377892-18380104 FORWARD LENGTH=603;AT3G49590.3 | Symbols: | Autophagy-related protein 13 | c	0.998246	30.1866	AHITLPPRIITDYVGSPATDPMRFFPSPGRS	X;X;X;X;X;X;X;X;X;X;X;X;X;X;X;Phospho (STY);X;X;X;X;X;X;X;X;X;X;Phospho (STY);X;X;X;X	XXXXXXXXPPPPPPPPPPPPPPPXXXXXXXX	IITDY(0.001)VGS(0.998)PAT(0.001)DPMR	IIT(-36.75)DY(-32.31)VGS(30.19)PAT(-30.19)DPMR	8	3	0.975334	1.4222	1.18618	1.01752	0.736269	1.07697	1.26599	0.208885
	AT3G49590.1 | Symbols: | Autophagy-related protein 13 | chr3:18377892-18380104 FORWARD LENGTH=603;AT3G49590.2 | Symbols: | Autophagy-related protein 13 | chr3:18377892-18380104 FORWARD LENGTH=603;AT3G49590.3 | Symbols: | Autophagy-related protein 13 | c	1	110.026	DYVGSPATDPMRFFPSPGRSVEGHSFTGRAG	X;X;X;X;Phospho (STY);X;X;X;X;X;X;X;X;X;X;Phospho (STY);X;X;X;X;X;X;X;X;Phospho (STY);X;X;X;X;X;X	XXXXXXXXXXXXPPPPPPPXXXXXXXXXXXX	FFPS(1)PGR	FFPS(110.03)PGR	4	2	1.11191	1.1526	1.08658	0.926226	0.742767	1.00607	1.25271	0.0940899
	AT3G49590.1 | Symbols: | Autophagy-related protein 13 | chr3:18377892-18380104 FORWARD LENGTH=603;AT3G49590.2 | Symbols: | Autophagy-related protein 13 | chr3:18377892-18380104 FORWARD LENGTH=603;AT3G49590.3 | Symbols: | Autophagy-related protein 13 | c	1	68.0687	SSNFSEPGRNPLPPFSPKSTRRSPSSQDSLP	Phospho (STY);X;X;X;X;X;X;X;X;X;X;X;X;X;X;Phospho (STY);X;X;X;X;X;X;Phospho (STY);X;X;X;X;X;X;X;X	XXXXXXXXXPPPPPPPPPXXXXXXXXXXXXX	NPLPPFS(1)PK	NPLPPFS(68.07)PK	7	2	1.15898	1.11472	1.09458	0.904495	0.844588	0.957444	1.24451	0.00817255
	AT3G49590.1 | Symbols: | Autophagy-related protein 13 | chr3:18377892-18380104 FORWARD LENGTH=603;AT3G49590.2 | Symbols: | Autophagy-related protein 13 | chr3:18377892-18380104 FORWARD LENGTH=603;AT3G49590.3 | Symbols: | Autophagy-related protein 13 | c	0.827268	7.39666	GVLSSSDSPRFAFSRSPSRLSSQDDLDDPDC	X;X;X;X;X;X;X;X;X;X;X;X;X;X;X;Phospho (STY);X;X;X;X;X;X;X;X;X;X;X;X;X;X;X	XXXXXXXXXXPPPPPPPPPXXXXXXXXXXXX	FAFS(0.151)RS(0.827)PS(0.022)R	FAFS(-7.4)RS(7.4)PS(-15.74)R	6	3	1.081	1.25887	1.0803	1.0245	0.872046	0.982812	1.18782	0.0779682
	AT3G49590.1 | Symbols: | Autophagy-related protein 13 | chr3:18377892-18380104 FORWARD LENGTH=603;AT3G49590.2 | Symbols: | Autophagy-related protein 13 | chr3:18377892-18380104 FORWARD LENGTH=603;AT3G49590.3 | Symbols: | Autophagy-related protein 13 | c	0.998782	29.1466	PMRFFPSPGRSVEGHSFTGRAGRPPLTGSSA	X;X;X;X;X;X;Phospho (STY);X;X;X;X;X;X;X;X;Phospho (STY);X;X;X;X;X;X;X;X;X;X;X;X;X;X;X	XXXXXXXXXXPPPPPPPPPPXXXXXXXXXXX	SVEGHS(0.999)FT(0.001)GR	S(-56.9)VEGHS(29.15)FT(-29.15)GR	6	3	1.23499	1.1766	1.35123	1.19672	0.930729	1.21482	1.12583	0.27116
