# Supplementary material
Source: Research Square preprint supplement (doi:10.21203/rs.3.rs-9554211/v1)
Supplement: Supplementary file 6 [file ca7a933d2a55e70e583a69b6.xlsx]

## Sheet: Primers
Oligonucleotide primers used in this study.
Primer Name	Sequence (5'-3')	Assay
PUB25-qRT-F	GAACCAAATCGGCGGACCT	qRT-PCR
PUB25-qRT-R	GGCTCGCTCCGTATCGCAT
PUB26-qRT-F	CGGATTCCTACACCTAAACAACC	qRT-PCR
PUB26-qRT-R	GAGCAAGCGACTCAGAAACAAG
ATG5-qRT-F	ACTGATACCATGTGAAGGAG	qRT-PCR
ATG5-qRT-R	GTATAGGCATCAAGATCACC
ATG7-qRT-F	GAAGATTGTCTAGGTCGTGG	qRT-PCR
ATG7-qRT-R	CCTGCTTTCTCTTGTATCGG
ATG1a-qRT-F	GGGCAATACAGGGCAGGTAA	qRT-PCR
ATG1a-qRT-R	AGTCTCAGGAGCCGTGGTTG
ATG13a-qRT-F	TCTCGTGGTCGTACTCGTGAG	qRT-PCR
ATG13a-qRT-R	TATCGTTTGAAATCGGATGGAC
ATG8a-qRT-F	CGAATCGCAATGGCTAAGAGTT	qRT-PCR
ATG8a-qRT-R	CATCAATGCAGCAGTTGGAGG
ATG8e-qRT-F	ACCTTGTGCCATCAGACCTAAC	qRT-PCR
ATG8e-qRT-R	AGCCATCTTCGTCTTTCTTATCC
FER-qRT-F	ACCGCGATGAAGTGTGTTCT	qRT-PCR
FER-qRT-R	TCCGTTCTCTTCTGCGCTTT
UBQ10-qRT-F	AGATCCAGGACAAGGAAGGTATTC	qRT-PCR
UBQ10-qRT-R	CGCAGGACCAAGTGAAGAGTAG
GUS-F	ATGTTACGTCCTGTAGAAACCCC	Primers for molecular cloning
GUS-R	TTGTTTGCCTCCCTGCTGC
ATG1a-F	ATGGAGTCGGCACGACTTG	Primers for molecular cloning
ATG1a-R	AAGATGAGACCGACGATGCT
ATG1b-F	ATGGCTCAGTCGTCGTTGGTG	Primers for molecular cloning
ATG1b-R	TTGCTTCTGAGGATATGAAGTTC
ATG1c-F	ATGATGATGCTTGATGATTAC	Primers for molecular cloning
ATG1c-R	TGATTGTCTGTTCATCATAGC
ATG1t-F	ATGATGATGCTTGATGATTAC	Primers for molecular cloning
ATG1t-R	ACAGTGTGAATATATATCATTG
FER-F	ATGAAGATCACAGAGGGACGATTC	Primers for molecular cloning
FER-R	ACGTCCCTTTGGATTCATGATCT
FER-KD-F	ATGGGTGCTTACCGCAGAC	Primers for molecular cloning
FER-KD-R	ACGTCCCTTTGGATTCATGATCT
mu-FERK565R-F	CATTGGGTTGCCTCTCCTGATGGCTACC	Primers for site-directed mutagenesis
mu-FERK565R-R	GGTTGCCTCTCCTGATGGCTACCTTTGT
fer-4 (GABI_GK106A06) FER-LP	ATGAAGATCACAGAGGGACGATTC	Primers for genotyping
fer-4 (GABI_GK106A06) FER-RP	AGCACCAAACACACAAAACCC
1	GATCGCAGCTCATAACGCTAC	Primers for genotyping (pub25, SALK_147032C)
2	CATGTCGATACCAAATTTGCC
3	ATAGCGATCCATGAGTCGATG	Primers for genotyping (pub26, SALK_00174C)
4	CTTTCGCATTTTTGTTTGACC
PUB25-gno-F	TTGGATACAGAAAAAAAAAACCG	Primers for molecular cloning
PUB25-gno-R	AAAAGGGACCACTTGGCTG
PUB26-gno-F	GGTCGTGGGAGTTCGACTAATCTTA	Primers for molecular cloning
PUB26-gno-R	AAACGGCGCCACTTCGCTAC
PUB25-F	ATGCCTAGGAATATAGAACCATTG	Primers for molecular cloning
PUB25-R	AAAAGGGACCACTTGGCTGC
PUB26-F	ATGCCGGGGAATTTAGAGCC	Primers for molecular cloning
PUB26-R	AAACGGCGCCACTTCGCTAC
mu-PUB25T95A-F	ACGTATCCCTGCTCCTAAACAACCAGCT	Primers for site-directed mutagenesis
mu-PUB25T95A-R	GTTGTTTAGGAGCAGGGATACGTTCGACTC
mu-PUB25T95D-F	ACGTATCCCTGATCCTAAACAACCAGCT	Primers for site-directed mutagenesis
mu-PUB25T95D-R	GTTGTTTAGGATCAGGGATACGTTCGACTC
mu-PUB26T94A-F	ACGGATTCCTGCACCTAAACAACCGGCG	Primers for site-directed mutagenesis
mu-PUB26T94A-R	GTTGTTTAGGTGCAGGAATCCGTTCGAC
mu-PUB26T94D-F	ACGGATTCCTGAACCTAAACAACCGGCG	Primers for site-directed mutagenesis
mu-PUB26T94D-R	GTTGTTTAGGTTCAGGAATCCGTTCGAC
mu-PUB26S406A-F	GCCTGACGATGCTACCGTTCATTCCGAC	Primers for site-directed mutagenesis
mu-PUB26S406A-R	AATGAACGGTAGCATCGTCAGGCCAAGA
mu-PUB26S406D-F	GCCTGACGATGATACCGTTCATTCCGAC	Primers for site-directed mutagenesis
mu-PUB26S406D-R	AATGAACGGTATCATCGTCAGGCCAAGA
mu-PUB26S410A-F	TACCGTTCATGCCGACGATTTCAATCGT	Primers for site-directed mutagenesis
mu-PUB26S410A-R	TGAAATCGTCGGCATGAACGGTAGAATC
mu-PUB26S410D-F	TACCGTTCATGACGACGATTTCAATCGT	Primers for site-directed mutagenesis
mu-PUB26S410D-R	TGAAATCGTCGTCATGAACGGTAGAATC
PUB251-81-F	ATGCATTTCAGATGCCCAATCT	Primers for molecular cloning
PUB251-81-R	TCACCATTCTTGGATAAGACGGC
PUB2581-421-F	ATGTGCGTCGCTAACCGC	Primers for molecular cloning
PUB2581-421-R	TCAAAAAGGGACCACTTGGCT
PUB261-80-F	ATGCATTTCAGATGCCCAATCT	Primers for molecular cloning
PUB261-80-R	TCACCATTCTTGGATAAGACGGC
PUB2680-421-F	ATGTGCGTCGCTAACCGC	Primers for molecular cloning
PUB2680-421-R	TCAAAACGGCGCCACTTC
FLAG-Ub-F	ATGgattacaaagacgatgacgataagcaaggtgactacaaagacgatgatgacaaaATGCAGATCTTTGTCAAGACG	Primers for molecular cloning
FLAG-Ub-R	TTAACCTCCACGGAGACGCAAC
GABI-LB	GTGGATTGATGTGATATCTCC	Primers for genotyping mutant lines

## Sheet: Mutant or transgenic line 
Mutants and transgenic lines used in this study.
Mutant or transgenic line	Description	Source
pub25	T-DNA insertion line, SALK_147032C	This study
pub26	T-DNA insertion line, SALK_00174C	This study
pub25 pub26		Wang et al., 2019
atg7-3	T-DNA insertion line, SAIL_11_H07	Jia et al., 2019
atg5-1	T-DNA insertion line, SAIL_129_B07	Suttangkakul et al., 2011
atg13ab	T-DNA insertion line, SALK_044831	Suttangkakul et al., 2011
atg1abct		Huang et al., 2019
35S::PUB25-FLAG (PUB25-OX)		Wang et al., 2019
35S::PUB26-FLAG (PUB26-OX)		Wang et al., 2019
35S::PUB25-YFP (PUB25-OX)	The transgenic plants harboring PUB25-YFP fusion genes under control of 35S promoter in Col-0, Basta resistance	This study
35S::PUB26-YFP (PUB26-OX)	The transgenic plants harboring PUB26-YFP fusion genes under control of 35S promoter in Col-0, Basta resistance	This study
proATG8a::GFP-ATG8a		Huang et al., 2018
pub25 pub26 proATG8a::GFP-ATG8a	Generated by crossing proATG8a::GFP-ATG8a/Col-0 with pub25 pub26 double mutant	This study
35S::PUB25-FLAG proATG8a::GFP-ATG8a	Generated by crossing proATG8a::GFP-ATG8a/Col-0 with 35S::PUB25-FLAG/Col-0, HYG resistance	This study
35S::PUB26-FLAG proATG8a::GFP-ATG8a	Generated by crossing proATG8a::GFP-ATG8a/Col-0 with 35S::PUB26-FLAG/Col-0, HYG resistance	This study
pub25 pub26 proPUB25::PUB25-MYC	The transgenic plants of a fuse gene of MYC with PUB25 CDS and 2.0 kb sequence upstream of ATG in pub25 pub26 background, HYG resistance	This study
pub25 pub26 proPUB26::PUB26-MYC	The transgenic plants of a fuse gene of MYC with PUB26 CDS and 2.0 kb sequence upstream of ATG in pub25 pub26 background, HYG resistance	This study
pub25 pub26 atg5-1	Generated by crossing atg5-1 with pub25 pub26 double mutant	This study
pub25 pub26 atg7-3	Generated by crossing atg7-3 with pub25 pub26 double mutant	This study
proATG1a::YFP-ATG1a	The transgenic plants harboring YFP-ATG1a fusion genes under control of ATG1a promoter in Col-0, HYG resistance	This study
35S::PUB25-FLAG proATG1a::YFP-ATG1a	Generated by crossing proATG1a::YFP-ATG1a/Col-0 with 35S::PUB25-FLAG/Col-0, HYG resistance	This study
35S::PUB26-FLAG proATG1a::YFP-ATG1a	Generated by crossing proATG1a::YFP-ATG1a/Col-0 with 35S::PUB26-FLAG/Col-0, HYG resistance	This study
pub25 pub26 proATG1a::YFP-ATG1a	Generated by crossing proATG1a::YFP-ATG1a/Col-0 with pub25 pub26, HYG resistance	This study
35S::YFP-ATG1a		Wang and Qin et al., 2022
35S::YFP-ATG1a 35S::PUB25-FLAG	Generated by crossing 35S::YFP-ATG1a/Col-0 with 35S::PUB25-FLAG/Col-0, Basta and HYG resistance	This study
35S::YFP-ATG1a 35S::PUB26-FLAG	Generated by crossing 35S::YFP-ATG1a/Col-0 with 35S::PUB26-FLAG/Col-0, Basta and HYG resistance	This study
pub25 pub26 proPUB25::PUB25T95A-MYC	The transgenic plants harboring PUB25T95A-MYC fusion genes under control of PUB25 promoter in pub25 pub26, HYG resistance	This study
pub25 pub26 proPUB25::PUB25T95D-MYC	The transgenic plants harboring PUB25T95D-MYC fusion genes under control of PUB25 promoter in pub25 pub26, HYG resistance	This study
pub25 pub26 proPUB26::PUB26T94A-MYC	The transgenic plants harboring PUB26T94A-MYC fusion genes under control of PUB26 promoter in pub25 pub26, HYG resistance	This study
pub25 pub26 proPUB26::PUB26T94D-MYC	The transgenic plants harboring PUB26T94D-MYC fusion genes under control of PUB26 promoter in pub25 pub26, HYG resistance	This study
pub25 pub26 proPUB26::PUB26S406A-MYC	The transgenic plants harboring PUB26S406A-MYC fusion genes under control of PUB26 promoter in pub25 pub26, HYG resistance	This study
pub25 pub26 proPUB26::PUB26S406D-MYC	The transgenic plants harboring PUB26S406D-MYC fusion genes under control of PUB26 promoter in pub25 pub26, HYG resistance	This study
pub25 pub26 proPUB26::PUB26S410A-MYC	The transgenic plants harboring PUB26S410A-MYC fusion genes under control of 35S promoter in pub25 pub26, HYG resistance	This study
pub25 pub26 proPUB26::PUB26S410D-MYC	The transgenic plants harboring PUB26S410D-MYC fusion genes under control of PUB26 promoter in pub25 pub26, HYG resistance	This study
atg1abct 35S::PUB26-MYC	The transgenic plants harboring PUB26-MYC fusion genes under control of 35S promoter in atg1abct, HYG resistance	This study
ost1-3	T-DNA insertion line, SALK_008068	Su et al., 2021
cpk28	T-DNA insertion line, SALK_112540	Wang et al., 2023
fer-4 proFER::FER-GFP		Chen et al., 2016
35S::PUB26-FLAG proFER::FER-GFP	Generated by crossing 35S::PUB26-FLAG/Col-0 with proFER::FER-GFP/fer-4, HYG and Kan resistance	This study
fer-4 35S::PUB25-FLAG	Generated by crossing 35S::PUB25-FLAG/Col-0 with fer-4, HYG resistance	This study
fer-4 35S::PUB26-FLAG	Generated by crossing 35S::PUB26-FLAG/Col-0 with fer-4, HYG resistance	This study
fer-4 proATG1a::YFP-ATG1a	Generated by crossing proATG1a::YFP-ATG1a/Col-0 with fer-4, HYG resistance	This study
pub25 pub26 proPUB26::PUB26-MYC proATG1a::YFP-ATG1a	Generated by crossing proATG1a::YFP-ATG1a/Col-0 with proPUB26::PUB26-MYC/pub25 pub26, HYG resistance	This study
pub25 pub26 proPUB26::PUB26T94A-MYC proATG1a::YFP-ATG1a	Generated by crossing proATG1a::YFP-ATG1a/Col-0 with proPUB26::PUB26T94A-MYC/pub25 pub26, HYG resistance	This study
pub25 pub26 proPUB26::PUB26T94D-MYC proATG1a::YFP-ATG1a	Generated by crossing proATG1a::YFP-ATG1a/Col-0 with proPUB26::PUB26T94D/pub25 pub26, HYG resistance	This study
fer-4	T-DNA insertion line, GABI_GK106A06	Chen et al., 2024
fer-4 proATG8a::GFP-ATG8a	Generated by crossing proATG8a::GFP-ATG8a/Col-0 with fer-4	This study
fer-4 pub25 pub26	Generated by crossing pub25 pub26 with fer-4	This study
35S::YFP-ATG13a		Wang and Qin et al., 2022
fer-4 35S::YFP-ATG13a	Generated by crossing 35S::YFP-ATG13a with fer-4, Basta resistance	This study

## Sheet: Constructs
Constructs used in this study.
Recombinant DNA	Vector	Resistance	Source
AD-PUB25	pGADT9 Getaway	Ampr	This study
AD-PUB26	pGADT9 Getaway	Ampr	This study
BD-PUB25	pGBKT9 Getaway	Ampr	This study
BD-PUB26	pGBKT9 Getaway	Ampr	This study
BD-PUB251-81	pGBKT7	Kanr	This study
BD-PUB261-80	pGBKT7	Kanr	This study
BD-PUB2581-421	pGBKT7	Kanr	This study
BD-PUB2680-421	pGBKT7	Kanr	This study
BD-ATG1a			Wang and Qin et al., 2022
BD-ATG1b			Wang and Qin et al., 2022
BD-ATG1c			Wang and Qin et al., 2022
BD-ATG1t			Wang and Qin et al., 2022
BD-ATG13a			Wang and Qin et al., 2022
BD-ATG13b			Wang and Qin et al., 2022
BD-ATG6			Wang and Qin et al., 2022
BD-ATG3			Wang and Qin et al., 2022
BD-ATG4a			Wang and Qin et al., 2022
BD-ATG12a			Wang and Qin et al., 2022
BD-ATG18h			Wang and Qin et al., 2022
BD-ATG5			Wang and Qin et al., 2022
BD-ATG7			Wang and Qin et al., 2022
BD-ATG8a			Wang and Qin et al., 2022
BD-ATG8e			Wang and Qin et al., 2022
BD-OST1	pGBKT7	Kanr	This study
BD-KIN10	pGBKT7	Kanr	This study
BD-MPK3	pGBKT7	Kanr	This study
BD-MPK6	pGBKT7	Kanr	This study
BD-CPK3	pGBKT7	Kanr	This study
BD-CPK6	pGBKT7	Kanr	This study
BD-CPK12	pGBKT7	Kanr	This study
BD-CIPK8	pGBKT7	Kanr	This study
BD-CIPK26	pGBKT7	Kanr	This study
BD-MIK2-KD	pGBKT7	Kanr	This study
BD-SOBIR-KD	pGBKT7	Kanr	This study
BD-VPS34	pGBKT7	Kanr	This study
BD-FER-KD	pGBKT7	Kanr	This study
BD-TOR	pGBKT7	Kanr	This study
AD-PUB26T94A	pGADT7	Ampr	This study
AD-PUB26T94D	pGADT7	Ampr	This study
BD-PUB26T94A	pGBKT7	Kanr	This study
BD-PUB26T94D	pGBKT7	Kanr	This study
35S::GUS-YFPc			Wang and Qin et al., 2022
35S::GUS-YFPn			Wang and Qin et al., 2022
35S::ATG1a-YFPc			Wang and Qin et al., 2022
35S::ATG1b-YFPc			Wang and Qin et al., 2022
35S::ATG1c-YFPc			Wang and Qin et al., 2022
35S::ATG1t-YFPc			Wang and Qin et al., 2022
35S::ATG13a-YFPc			Wang and Qin et al., 2022
35S::ATG13b-YFPc			Wang and Qin et al., 2022
35S::PUB25-YFPn	pEearleygate201-YN (YFPN)	Kanr	This study
35S::PUB25-YFPc	pEearleygate202-YC (YFPC)	Kanr	This study
35S::PUB26-YFPn	pEearleygate201-YN (YFPN)	Kanr	This study
35S::PUB26-YFPc	pEearleygate202-YC (YFPC)	Kanr	This study
35S::PUB2680-421-YFPc	pEearleygate202-YC (YFPC)	Kanr	This study
35S::FERK565R-YFPn	pEearleygate201-YN (YFPN)	Kanr	This study
35S::FER-KD-YFPn	pEearleygate201-YN (YFPN)	Kanr	This study
35S::PUB25-nLUC	pCAMBIA1300-nLUC	Kanr	This study
35S::PUB26-nLUC	pCAMBIA1300-nLUC	Kanr	This study
35S::PUB261-80-nLUC	pCAMBIA1300-nLUC	Kanr	This study
35S::PUB2680-421-nLUC	pCAMBIA1300-nLUC	Kanr	This study
35S::FERK565R-nLUC	pCAMBIA1300-nLUC	Kanr	This study
35S::FERK565R-cLUC	pCAMBIA1300-cLUC	Kanr	This study
35S::FER-KD-cLUC	pCAMBIA1300-cLUC	Kanr	This study
35S::ATG1a-cLUC	pCAMBIA1300-cLUC	Kanr	This study
35S::ATG1b-cLUC	pCAMBIA1300-cLUC	Kanr	This study
35S::ATG1c-cLUC	pCAMBIA1300-cLUC	Kanr	This study
35S::ATG1t-cLUC	pCAMBIA1300-cLUC	Kanr	This study
35S::ATG13a-cLUC	pCAMBIA1300-cLUC	Kanr	This study
35S::ATG13b-cLUC	pCAMBIA1300-cLUC	Kanr	This study
GST-PUB25	pGEX-4T-1	Ampr	This study
GST-PUB26	pGEX-4T-1	Ampr	This study
GST-PUB25T95A	pGEX-4T-1	Ampr	This study
GST-PUB25T95D	pGEX-4T-1	Ampr	This study
GST-PUB26T94A	pGEX-4T-1	Ampr	This study
GST-PUB26T94D	pGEX-4T-1	Ampr	This study
GST-PUB26S406A	pGEX-4T-1	Ampr	This study
GST-PUB26S406D	pGEX-4T-1	Ampr	This study
GST-PUB26S410A	pGEX-4T-1	Ampr	This study
GST-PUB26S410D	pGEX-4T-1	Ampr	This study
MBP-ATG1a			Wang and Qin et al., 2022
MBP-ATG13a			Wang and Qin et al., 2022
HIS-FER-KD			Liu et al., 2023
HIS-FERK565R-KD			Liu et al., 2023
35S::YFP-ATG1a			Wang and Qin et al., 2022
35S::YFP-ATG13a			Wang and Qin et al., 2022
35S::PUB25-GFP	pEarleyGate103	Kanr/Bastar	This study
35S::PUB26-GFP	pEarleyGate103	Kanr/Bastar	This study
35S::PUB26T94A-GFP	pEarleyGate103	Kanr/Bastar	This study
35S::PUB26T94D-GFP	pEarleyGate103	Kanr/Bastar	This study
35S::PUB25-MYC	pGWB517	Sper/Hygr	This study
35S::PUB26-MYC	pGWB517	Sper/Hygr	This study
proPUB25::PUB25-MYC	pGWB516	Sper/Hygr	This study
proPUB26::PUB26-MYC	pGWB516	Sper/Hygr	This study
proPUB25:PUB25T95A-MYC	pGWB516	Sper/Hygr	This study
proPUB25::PUB25T95D-MYC	pGWB516	Sper/Hygr	This study
proPUB26::PUB26T94A-MYC	pGWB516	Sper/Hygr	This study
proPUB26::PUB26T94D-MYC	pGWB516	Sper/Hygr	This study
proPUB26::PUB26S406A-MYC	pGWB516	Sper/Hygr	This study
proPUB26::PUB26S406D-MYC	pGWB516	Sper/Hygr	This study
proPUB26::PUB26S410A-MYC	pGWB516	Sper/Hygr	This study
proPUB26::PUB26S410D-MYC	pGWB516	Sper/Hygr	This study
35S::FLAG-UBQ	pCAMBIA1300	Kanr/HYGr	This study
35S::RFP-ATG8a	pCAMBIA1300	Kanr	This study
35S::GFP-ATG1a	pEarleyGate104	Kanr	This study
