# Supplementary material
Source: Research Square preprint supplement (doi:10.21203/rs.3.rs-9554211/v1)
Supplement: Supplementary file 7 [file ccd48e28296e18e733873e56.xlsx]

## Sheet: Fig.1
		Fig.1b
			Col-0			atg1abct			pub25			pub26			pub25 pub26			PUB25-OX #1			PUB25-OX #37			PUB25-OX #44			PUB26-OX #1			PUB26-OX #2			PUB26-OX #15
			R1	R2	R3	R1	R2	R3	R1	R2	R3	R1	R2	R3	R1	R2	R3	R1	R2	R3	R1	R2	R3	R1	R2	R3	R1	R2	R3	R1	R2	R3	R1	R2	R3
		+N	1.44928	1.49	1.38404	1.51364	1.28631	1.35737	1.22352	1.61834	1.30235	1.38134	1.49143	1.41949	1.33515	1.44871	1.47134	1.46861	1.44461	1.53546	1.52313	1.35305	1.66098	1.63895	1.24076	1.57825	1.59127	1.67018	1.04515	1.75268	1.22673	1.35305	1.49081	1.62123	1.36902
		-N	0.226339	0.299562	0.346977	0.0829112	0.11519	0.065841	0.279753	0.317197	0.295309	0.24499	0.300689	0.214259	0.536789	0.602842	0.334335	0.0998541	0.118826	0.056733	0.0726617	0.120319	0.092097	0.075784	0.0551256	0.098051	0.105732	0.0768317	0.066297	0.0816632	0.0484969	0.078011	0.114609	0.10125	0.090306
		+N									-N
		Tukey HSD									Tukey HSD
		(I) VAR00001	(J) VAR00001	Mean Difference (I-J)	Std. Error	Sig.	95% Confidence Interval				(I) VAR00001	(J) VAR00001	Mean Difference (I-J)	Std. Error	Sig.	95% Confidence Interval
							Lower Bound	Upper Bound								Lower Bound	Upper Bound
		Col-0	atg1abct	0.05534	0.14516	1	-0.4636	0.5743			Col-0	atg1abct	0.20298	0.04201	0.003	0.0528	0.3531
			pub25	0.0597	0.14516	1	-0.4592	0.5786				pub25	-0.00646	0.04201	1	-0.1566	0.1437
			pub26	0.01036	0.14516	1	-0.5086	0.5293				pub26	0.03765	0.04201	0.997	-0.1125	0.1878
			pub25 pub26	0.02271	0.14516	1	-0.4962	0.5416				pub25 pub26	-0.20036	0.04201	0.003	-0.3505	-0.0502
			PUB25-OX #1	-0.04178	0.14516	1	-0.5607	0.4771				PUB25-OX #1	0.19915	0.04201	0.004	0.049	0.3493
			PUB25-OX #37	-0.07128	0.14516	1	-0.5902	0.4476				PUB25-OX #37	0.19593	0.04201	0.004	0.0458	0.3461
			PUB25-OX #44	-0.04488	0.14516	1	-0.5638	0.474				PUB25-OX #44	0.21464	0.04201	0.002	0.0645	0.3648
			PUB26-OX #1	0.00558	0.14516	1	-0.5133	0.5245				PUB26-OX #1	0.20801	0.04201	0.002	0.0578	0.3582
			PUB26-OX #2	-0.00304	0.14516	1	-0.522	0.5159				PUB26-OX #2	0.22157	0.04201	0.001	0.0714	0.3717
			PUB26-OX #15	-0.05258	0.14516	1	-0.5715	0.4663				PUB26-OX #15	0.1889	0.04201	0.007	0.0387	0.3391
		atg1abct	Col-0	-0.05534	0.14516	1	-0.5743	0.4636			atg1abct	Col-0	-0.20298	0.04201	0.003	-0.3531	-0.0528
			pub25	0.00437	0.14516	1	-0.5145	0.5233				pub25	-0.20944	0.04201	0.002	-0.3596	-0.0593
			pub26	-0.04498	0.14516	1	-0.5639	0.4739				pub26	-0.16533	0.04201	0.023	-0.3155	-0.0152
			pub25 pub26	-0.03263	0.14516	1	-0.5515	0.4863				pub25 pub26	-0.40334	0.04201	0	-0.5535	-0.2532
			PUB25-OX #1	-0.09712	0.14516	1	-0.616	0.4218				PUB25-OX #1	-0.00382	0.04201	1	-0.154	0.1463
			PUB25-OX #37	-0.12661	0.14516	0.998	-0.6455	0.3923				PUB25-OX #37	-0.00705	0.04201	1	-0.1572	0.1431
			PUB25-OX #44	-0.10022	0.14516	1	-0.6191	0.4187				PUB25-OX #44	0.01166	0.04201	1	-0.1385	0.1618
			PUB26-OX #1	-0.04976	0.14516	1	-0.5687	0.4692				PUB26-OX #1	0.00503	0.04201	1	-0.1451	0.1552
			PUB26-OX #2	-0.05838	0.14516	1	-0.5773	0.4605				PUB26-OX #2	0.01859	0.04201	1	-0.1316	0.1688
			PUB26-OX #15	-0.10792	0.14516	0.999	-0.6268	0.411				PUB26-OX #15	-0.01407	0.04201	1	-0.1642	0.1361
		pub25	Col-0	-0.0597	0.14516	1	-0.5786	0.4592			pub25	Col-0	0.00646	0.04201	1	-0.1437	0.1566
			atg1abct	-0.00437	0.14516	1	-0.5233	0.5145				atg1abct	0.20944	0.04201	0.002	0.0593	0.3596
			pub26	-0.04934	0.14516	1	-0.5683	0.4696				pub26	0.04411	0.04201	0.991	-0.1061	0.1943
			pub25 pub26	-0.037	0.14516	1	-0.5559	0.4819				pub25 pub26	-0.1939	0.04201	0.005	-0.3441	-0.0437
			PUB25-OX #1	-0.10149	0.14516	1	-0.6204	0.4174				PUB25-OX #1	0.20562	0.04201	0.003	0.0555	0.3558
			PUB25-OX #37	-0.13098	0.14516	0.997	-0.6499	0.3879				PUB25-OX #37	0.20239	0.04201	0.003	0.0522	0.3526
			PUB25-OX #44	-0.10458	0.14516	1	-0.6235	0.4143				PUB25-OX #44	0.2211	0.04201	0.001	0.0709	0.3713
			PUB26-OX #1	-0.05413	0.14516	1	-0.573	0.4648				PUB26-OX #1	0.21447	0.04201	0.002	0.0643	0.3646
			PUB26-OX #2	-0.06275	0.14516	1	-0.5817	0.4562				PUB26-OX #2	0.22803	0.04201	0.001	0.0779	0.3782
			PUB26-OX #15	-0.11228	0.14516	0.999	-0.6312	0.4066				PUB26-OX #15	0.19536	0.04201	0.005	0.0452	0.3455
		pub26	Col-0	-0.01036	0.14516	1	-0.5293	0.5086			pub26	Col-0	-0.03765	0.04201	0.997	-0.1878	0.1125
			atg1abct	0.04498	0.14516	1	-0.4739	0.5639				atg1abct	0.16533	0.04201	0.023	0.0152	0.3155
			pub25	0.04934	0.14516	1	-0.4696	0.5683				pub25	-0.04411	0.04201	0.991	-0.1943	0.1061
			pub25 pub26	0.01235	0.14516	1	-0.5066	0.5313				pub25 pub26	-0.23801	0.04201	0	-0.3882	-0.0878
			PUB25-OX #1	-0.05214	0.14516	1	-0.5711	0.4668				PUB25-OX #1	0.16151	0.04201	0.028	0.0113	0.3117
			PUB25-OX #37	-0.08164	0.14516	1	-0.6005	0.4373				PUB25-OX #37	0.15829	0.04201	0.033	0.0081	0.3084
			PUB25-OX #44	-0.05524	0.14516	1	-0.5742	0.4637				PUB25-OX #44	0.17699	0.04201	0.012	0.0268	0.3272
			PUB26-OX #1	-0.00478	0.14516	1	-0.5237	0.5141				PUB26-OX #1	0.17036	0.04201	0.018	0.0202	0.3205
			PUB26-OX #2	-0.0134	0.14516	1	-0.5323	0.5055				PUB26-OX #2	0.18392	0.04201	0.009	0.0338	0.3341
			PUB26-OX #15	-0.06294	0.14516	1	-0.5819	0.456				PUB26-OX #15	0.15126	0.04201	0.047	0.0011	0.3014
		pub25 pub26	Col-0	-0.02271	0.14516	1	-0.5416	0.4962			pub25 pub26	Col-0	0.20036	0.04201	0.003	0.0502	0.3505
			atg1abct	0.03263	0.14516	1	-0.4863	0.5515				atg1abct	0.40334	0.04201	0	0.2532	0.5535
			pub25	0.037	0.14516	1	-0.4819	0.5559				pub25	0.1939	0.04201	0.005	0.0437	0.3441
			pub26	-0.01235	0.14516	1	-0.5313	0.5066				pub26	0.23801	0.04201	0	0.0878	0.3882
			PUB25-OX #1	-0.06449	0.14516	1	-0.5834	0.4544				PUB25-OX #1	0.39952	0.04201	0	0.2494	0.5497
			PUB25-OX #37	-0.09398	0.14516	1	-0.6129	0.4249				PUB25-OX #37	0.3963	0.04201	0	0.2461	0.5465
			PUB25-OX #44	-0.06759	0.14516	1	-0.5865	0.4513				PUB25-OX #44	0.415	0.04201	0	0.2648	0.5652
			PUB26-OX #1	-0.01713	0.14516	1	-0.536	0.5018				PUB26-OX #1	0.40837	0.04201	0	0.2582	0.5585
			PUB26-OX #2	-0.02575	0.14516	1	-0.5447	0.4932				PUB26-OX #2	0.42193	0.04201	0	0.2718	0.5721
			PUB26-OX #15	-0.07529	0.14516	1	-0.5942	0.4436				PUB26-OX #15	0.38927	0.04201	0	0.2391	0.5394
		PUB25-OX #1	Col-0	0.04178	0.14516	1	-0.4771	0.5607			PUB25-OX #1	Col-0	-0.19915	0.04201	0.004	-0.3493	-0.049
			atg1abct	0.09712	0.14516	1	-0.4218	0.616				atg1abct	0.00382	0.04201	1	-0.1463	0.154
			pub25	0.10149	0.14516	1	-0.4174	0.6204				pub25	-0.20562	0.04201	0.003	-0.3558	-0.0555
			pub26	0.05214	0.14516	1	-0.4668	0.5711				pub26	-0.16151	0.04201	0.028	-0.3117	-0.0113
			pub25 pub26	0.06449	0.14516	1	-0.4544	0.5834				pub25 pub26	-0.39952	0.04201	0	-0.5497	-0.2494
			PUB25-OX #37	-0.02949	0.14516	1	-0.5484	0.4894				PUB25-OX #37	-0.00322	0.04201	1	-0.1534	0.1469
			PUB25-OX #44	-0.0031	0.14516	1	-0.522	0.5158				PUB25-OX #44	0.01548	0.04201	1	-0.1347	0.1656
			PUB26-OX #1	0.04736	0.14516	1	-0.4716	0.5663				PUB26-OX #1	0.00885	0.04201	1	-0.1413	0.159
			PUB26-OX #2	0.03874	0.14516	1	-0.4802	0.5577				PUB26-OX #2	0.02241	0.04201	1	-0.1277	0.1726
			PUB26-OX #15	-0.01079	0.14516	1	-0.5297	0.5081				PUB26-OX #15	-0.01025	0.04201	1	-0.1604	0.1399
		PUB25-OX #37	Col-0	0.07128	0.14516	1	-0.4476	0.5902			PUB25-OX #37	Col-0	-0.19593	0.04201	0.004	-0.3461	-0.0458
			atg1abct	0.12661	0.14516	0.998	-0.3923	0.6455				atg1abct	0.00705	0.04201	1	-0.1431	0.1572
			pub25	0.13098	0.14516	0.997	-0.3879	0.6499				pub25	-0.20239	0.04201	0.003	-0.3526	-0.0522
			pub26	0.08164	0.14516	1	-0.4373	0.6005				pub26	-0.15829	0.04201	0.033	-0.3084	-0.0081
			pub25 pub26	0.09398	0.14516	1	-0.4249	0.6129				pub25 pub26	-0.3963	0.04201	0	-0.5465	-0.2461
			PUB25-OX #1	0.02949	0.14516	1	-0.4894	0.5484				PUB25-OX #1	0.00322	0.04201	1	-0.1469	0.1534
			PUB25-OX #44	0.0264	0.14516	1	-0.4925	0.5453				PUB25-OX #44	0.01871	0.04201	1	-0.1315	0.1689
			PUB26-OX #1	0.07685	0.14516	1	-0.4421	0.5958				PUB26-OX #1	0.01207	0.04201	1	-0.1381	0.1622
			PUB26-OX #2	0.06823	0.14516	1	-0.4507	0.5871				PUB26-OX #2	0.02564	0.04201	1	-0.1245	0.1758
			PUB26-OX #15	0.0187	0.14516	1	-0.5002	0.5376				PUB26-OX #15	-0.00703	0.04201	1	-0.1572	0.1431
		PUB25-OX #44	Col-0	0.04488	0.14516	1	-0.474	0.5638			PUB25-OX #44	Col-0	-0.21464	0.04201	0.002	-0.3648	-0.0645
			atg1abct	0.10022	0.14516	1	-0.4187	0.6191				atg1abct	-0.01166	0.04201	1	-0.1618	0.1385
			pub25	0.10458	0.14516	1	-0.4143	0.6235				pub25	-0.2211	0.04201	0.001	-0.3713	-0.0709
			pub26	0.05524	0.14516	1	-0.4637	0.5742				pub26	-0.17699	0.04201	0.012	-0.3272	-0.0268
			pub25 pub26	0.06759	0.14516	1	-0.4513	0.5865				pub25 pub26	-0.415	0.04201	0	-0.5652	-0.2648
			PUB25-OX #1	0.0031	0.14516	1	-0.5158	0.522				PUB25-OX #1	-0.01548	0.04201	1	-0.1656	0.1347
			PUB25-OX #37	-0.0264	0.14516	1	-0.5453	0.4925				PUB25-OX #37	-0.01871	0.04201	1	-0.1689	0.1315
			PUB26-OX #1	0.05046	0.14516	1	-0.4685	0.5694				PUB26-OX #1	-0.00663	0.04201	1	-0.1568	0.1435
			PUB26-OX #2	0.04184	0.14516	1	-0.4771	0.5608				PUB26-OX #2	0.00693	0.04201	1	-0.1432	0.1571
			PUB26-OX #15	-0.0077	0.14516	1	-0.5266	0.5112				PUB26-OX #15	-0.02573	0.04201	1	-0.1759	0.1244
		PUB26-OX #1	Col-0	-0.00558	0.14516	1	-0.5245	0.5133			PUB26-OX #1	Col-0	-0.20801	0.04201	0.002	-0.3582	-0.0578
			atg1abct	0.04976	0.14516	1	-0.4692	0.5687				atg1abct	-0.00503	0.04201	1	-0.1552	0.1451
			pub25	0.05413	0.14516	1	-0.4648	0.573				pub25	-0.21447	0.04201	0.002	-0.3646	-0.0643
			pub26	0.00478	0.14516	1	-0.5141	0.5237				pub26	-0.17036	0.04201	0.018	-0.3205	-0.0202
			pub25 pub26	0.01713	0.14516	1	-0.5018	0.536				pub25 pub26	-0.40837	0.04201	0	-0.5585	-0.2582
			PUB25-OX #1	-0.04736	0.14516	1	-0.5663	0.4716				PUB25-OX #1	-0.00885	0.04201	1	-0.159	0.1413
			PUB25-OX #37	-0.07685	0.14516	1	-0.5958	0.4421				PUB25-OX #37	-0.01207	0.04201	1	-0.1622	0.1381
			PUB25-OX #44	-0.05046	0.14516	1	-0.5694	0.4685				PUB25-OX #44	0.00663	0.04201	1	-0.1435	0.1568
			PUB26-OX #2	-0.00862	0.14516	1	-0.5275	0.5103				PUB26-OX #2	0.01356	0.04201	1	-0.1366	0.1637
			PUB26-OX #15	-0.05815	0.14516	1	-0.5771	0.4608				PUB26-OX #15	-0.0191	0.04201	1	-0.1693	0.1311
		PUB26-OX #2	Col-0	0.00304	0.14516	1	-0.5159	0.522			PUB26-OX #2	Col-0	-0.22157	0.04201	0.001	-0.3717	-0.0714
			atg1abct	0.05838	0.14516	1	-0.4605	0.5773				atg1abct	-0.01859	0.04201	1	-0.1688	0.1316
			pub25	0.06275	0.14516	1	-0.4562	0.5817				pub25	-0.22803	0.04201	0.001	-0.3782	-0.0779
			pub26	0.0134	0.14516	1	-0.5055	0.5323				pub26	-0.18392	0.04201	0.009	-0.3341	-0.0338
			pub25 pub26	0.02575	0.14516	1	-0.4932	0.5447				pub25 pub26	-0.42193	0.04201	0	-0.5721	-0.2718
			PUB25-OX #1	-0.03874	0.14516	1	-0.5577	0.4802				PUB25-OX #1	-0.02241	0.04201	1	-0.1726	0.1277
			PUB25-OX #37	-0.06823	0.14516	1	-0.5871	0.4507				PUB25-OX #37	-0.02564	0.04201	1	-0.1758	0.1245
			PUB25-OX #44	-0.04184	0.14516	1	-0.5608	0.4771				PUB25-OX #44	-0.00693	0.04201	1	-0.1571	0.1432
			PUB26-OX #1	0.00862	0.14516	1	-0.5103	0.5275				PUB26-OX #1	-0.01356	0.04201	1	-0.1637	0.1366
			PUB26-OX #15	-0.04954	0.14516	1	-0.5685	0.4694				PUB26-OX #15	-0.03266	0.04201	0.999	-0.1828	0.1175
		PUB26-OX #15	Col-0	0.05258	0.14516	1	-0.4663	0.5715			PUB26-OX #15	Col-0	-0.1889	0.04201	0.007	-0.3391	-0.0387
			atg1abct	0.10792	0.14516	0.999	-0.411	0.6268				atg1abct	0.01407	0.04201	1	-0.1361	0.1642
			pub25	0.11228	0.14516	0.999	-0.4066	0.6312				pub25	-0.19536	0.04201	0.005	-0.3455	-0.0452
			pub26	0.06294	0.14516	1	-0.456	0.5819				pub26	-0.15126	0.04201	0.047	-0.3014	-0.0011
			pub25 pub26	0.07529	0.14516	1	-0.4436	0.5942				pub25 pub26	-0.38927	0.04201	0	-0.5394	-0.2391
			PUB25-OX #1	0.01079	0.14516	1	-0.5081	0.5297				PUB25-OX #1	0.01025	0.04201	1	-0.1399	0.1604
			PUB25-OX #37	-0.0187	0.14516	1	-0.5376	0.5002				PUB25-OX #37	0.00703	0.04201	1	-0.1431	0.1572
			PUB25-OX #44	0.0077	0.14516	1	-0.5112	0.5266				PUB25-OX #44	0.02573	0.04201	1	-0.1244	0.1759
			PUB26-OX #1	0.05815	0.14516	1	-0.4608	0.5771				PUB26-OX #1	0.0191	0.04201	1	-0.1311	0.1693
			PUB26-OX #2	0.04954	0.14516	1	-0.4694	0.5685				PUB26-OX #2	0.03266	0.04201	0.999	-0.1175	0.1828
		Fig.1d
			Col-0			atg1abct			pub25			pub26			pub25 pub26			PUB25-OX #1			PUB25-OX #37			PUB25-OX #44			PUB26-OX #1			PUB26-OX #2			PUB26-OX #15
			R1	R2	R3	R1	R2	R3	R1	R2	R3	R1	R2	R3	R1	R2	R3	R1	R2	R3	R1	R2	R3	R1	R2	R3	R1	R2	R3	R1	R2	R3	R1	R2	R3
		+N	104.017	100.66	101.364	98.0589	100.152	99.98	93.3783	97.6208	101.908	99.1733	106.779	92.5136	99.9121	98.7957	99.1238	100.036	100.554	95.912	110.365	94.9671	98.4121	110.365	97.9671	98.4121	99.7704	97.8774	102.859	100.122	96.8966	105.2	97.5032	99.7394	108.943
		-N	72.6939	71.3631	70.467	22.9077	24.8002	29.0027	71.8764	64.9163	64.4029	69.8219	72.9377	71.6222	97.172	87.7305	95.8129	44.0808	41.2692	46.2879	41.6398	45.1277	44.8792	40.6692	45.0436	52.5987	48.4067	46.3819	46.9978	43.0155	45.3588	44.1986	41.9825	46.8064	45.4851
		+N									-N
		Tukey HSD									Tukey HSD
		(I) VAR00001	(J) VAR00001	Mean Difference (I-J)	Std. Error	Sig.	95% Confidence Interval				(I) VAR00001	(J) VAR00001	Mean Difference (I-J)	Std. Error	Sig.	95% Confidence Interval
							Lower Bound	Upper Bound								Lower Bound	Upper Bound
		Col-0	atg1abct	2.61688	3.93749	1	-11.4589	16.6927			Col-0	atg1abct	45.93784*	2.60667	0	36.6195	55.2562
			pub25	4.3781	3.93749	0.986	-9.6977	18.4539				pub25	4.44283	2.60667	0.818	-4.8755	13.7612
			pub26	2.52513	3.93749	1	-11.5507	16.6009				pub26	0.04744	2.60667	1	-9.2709	9.3658
			pub25 pub26	2.73656	3.93749	1	-11.3392	16.8123				pub25 pub26	-22.06378*	2.60667	0	-31.3821	-12.7454
			PUB25-OX #1	3.17975	3.93749	0.999	-10.896	17.2555				PUB25-OX #1	27.62874*	2.60667	0	18.3104	36.9471
			PUB25-OX #37	0.76559	3.93749	1	-13.3102	14.8414				PUB25-OX #37	27.62580*	2.60667	0	18.3074	36.9442
			PUB25-OX #44	-0.23441	3.93749	1	-14.3102	13.8414				PUB25-OX #44	25.40419*	2.60667	0	16.0858	34.7226
			PUB26-OX #1	1.84494	3.93749	1	-12.2308	15.9207				PUB26-OX #1	24.24591*	2.60667	0	14.9275	33.5643
			PUB26-OX #2	1.27423	3.93749	1	-12.8016	15.35				PUB26-OX #2	27.31708*	2.60667	0	17.9987	36.6354
			PUB26-OX #15	-0.04811	3.93749	1	-14.1239	14.0277				PUB26-OX #15	26.75005*	2.60667	0	17.4317	36.0684
		atg1abct	Col-0	-2.61688	3.93749	1	-16.6927	11.4589			atg1abct	Col-0	-45.93784*	2.60667	0	-55.2562	-36.6195
			pub25	1.76121	3.93749	1	-12.3146	15.837				pub25	-41.49501*	2.60667	0	-50.8134	-32.1766
			pub26	-0.09176	3.93749	1	-14.1675	13.984				pub26	-45.89040*	2.60667	0	-55.2088	-36.572
			pub25 pub26	0.11968	3.93749	1	-13.9561	14.1955				pub25 pub26	-68.00162*	2.60667	0	-77.32	-58.6833
			PUB25-OX #1	0.56286	3.93749	1	-13.5129	14.6386				PUB25-OX #1	-18.30910*	2.60667	0	-27.6275	-8.9907
			PUB25-OX #37	-1.8513	3.93749	1	-15.9271	12.2245				PUB25-OX #37	-18.31205*	2.60667	0	-27.6304	-8.9937
			PUB25-OX #44	-2.8513	3.93749	1	-16.9271	11.2245				PUB25-OX #44	-20.53365*	2.60667	0	-29.852	-11.2153
			PUB26-OX #1	-0.77195	3.93749	1	-14.8477	13.3038				PUB26-OX #1	-21.69193*	2.60667	0	-31.0103	-12.3736
			PUB26-OX #2	-1.34265	3.93749	1	-15.4184	12.7331				PUB26-OX #2	-18.62076*	2.60667	0	-27.9391	-9.3024
			PUB26-OX #15	-2.665	3.93749	1	-16.7408	11.4108				PUB26-OX #15	-19.18779*	2.60667	0	-28.5062	-9.8694
		pub25	Col-0	-4.3781	3.93749	0.986	-18.4539	9.6977			pub25	Col-0	-4.44283	2.60667	0.818	-13.7612	4.8755
			atg1abct	-1.76121	3.93749	1	-15.837	12.3146				atg1abct	41.49501*	2.60667	0	32.1766	50.8134
			pub26	-1.85297	3.93749	1	-15.9288	12.2228				pub26	-4.3954	2.60667	0.827	-13.7138	4.923
			pub25 pub26	-1.64154	3.93749	1	-15.7173	12.4342				pub25 pub26	-26.50661*	2.60667	0	-35.825	-17.1882
			PUB25-OX #1	-1.19835	3.93749	1	-15.2741	12.8774				PUB25-OX #1	23.18591*	2.60667	0	13.8675	32.5043
			PUB25-OX #37	-3.61251	3.93749	0.997	-17.6883	10.4633				PUB25-OX #37	23.18296*	2.60667	0	13.8646	32.5013
			PUB25-OX #44	-4.61251	3.93749	0.979	-18.6883	9.4633				PUB25-OX #44	20.96136*	2.60667	0	11.643	30.2797
			PUB26-OX #1	-2.53316	3.93749	1	-16.6089	11.5426				PUB26-OX #1	19.80308*	2.60667	0	10.4847	29.1214
			PUB26-OX #2	-3.10387	3.93749	0.999	-17.1796	10.9719				PUB26-OX #2	22.87425*	2.60667	0	13.5559	32.1926
			PUB26-OX #15	-4.42621	3.93749	0.985	-18.502	9.6496				PUB26-OX #15	22.30721*	2.60667	0	12.9889	31.6256
		pub26	Col-0	-2.52513	3.93749	1	-16.6009	11.5507			pub26	Col-0	-0.04744	2.60667	1	-9.3658	9.2709
			atg1abct	0.09176	3.93749	1	-13.984	14.1675				atg1abct	45.89040*	2.60667	0	36.572	55.2088
			pub25	1.85297	3.93749	1	-12.2228	15.9288				pub25	4.3954	2.60667	0.827	-4.923	13.7138
			pub25 pub26	0.21143	3.93749	1	-13.8644	14.2872				pub25 pub26	-22.11121*	2.60667	0	-31.4296	-12.7929
			PUB25-OX #1	0.65462	3.93749	1	-13.4212	14.7304				PUB25-OX #1	27.58131*	2.60667	0	18.2629	36.8997
			PUB25-OX #37	-1.75954	3.93749	1	-15.8353	12.3162				PUB25-OX #37	27.57836*	2.60667	0	18.26	36.8967
			PUB25-OX #44	-2.75954	3.93749	1	-16.8353	11.3162				PUB25-OX #44	25.35675*	2.60667	0	16.0384	34.6751
			PUB26-OX #1	-0.68019	3.93749	1	-14.756	13.3956				PUB26-OX #1	24.19847*	2.60667	0	14.8801	33.5168
			PUB26-OX #2	-1.2509	3.93749	1	-15.3267	12.8249				PUB26-OX #2	27.26965*	2.60667	0	17.9513	36.588
			PUB26-OX #15	-2.57324	3.93749	1	-16.649	11.5025				PUB26-OX #15	26.70261*	2.60667	0	17.3842	36.021
		pub25 pub26	Col-0	-2.73656	3.93749	1	-16.8123	11.3392			pub25 pub26	Col-0	22.06378*	2.60667	0	12.7454	31.3821
			atg1abct	-0.11968	3.93749	1	-14.1955	13.9561				atg1abct	68.00162*	2.60667	0	58.6833	77.32
			pub25	1.64154	3.93749	1	-12.4342	15.7173				pub25	26.50661*	2.60667	0	17.1882	35.825
			pub26	-0.21143	3.93749	1	-14.2872	13.8644				pub26	22.11121*	2.60667	0	12.7929	31.4296
			PUB25-OX #1	0.44318	3.93749	1	-13.6326	14.519				PUB25-OX #1	49.69252*	2.60667	0	40.3742	59.0109
			PUB25-OX #37	-1.97097	3.93749	1	-16.0468	12.1048				PUB25-OX #37	49.68957*	2.60667	0	40.3712	59.0079
			PUB25-OX #44	-2.97097	3.93749	0.999	-17.0468	11.1048				PUB25-OX #44	47.46797*	2.60667	0	38.1496	56.7863
			PUB26-OX #1	-0.89163	3.93749	1	-14.9674	13.1842				PUB26-OX #1	46.30969*	2.60667	0	36.9913	55.6281
			PUB26-OX #2	-1.46233	3.93749	1	-15.5381	12.6135				PUB26-OX #2	49.38086*	2.60667	0	40.0625	58.6992
			PUB26-OX #15	-2.78468	3.93749	1	-16.8605	11.2911				PUB26-OX #15	48.81382*	2.60667	0	39.4955	58.1322
		PUB25-OX #1	Col-0	-3.17975	3.93749	0.999	-17.2555	10.896			PUB25-OX #1	Col-0	-27.62874*	2.60667	0	-36.9471	-18.3104
			atg1abct	-0.56286	3.93749	1	-14.6386	13.5129				atg1abct	18.30910*	2.60667	0	8.9907	27.6275
			pub25	1.19835	3.93749	1	-12.8774	15.2741				pub25	-23.18591*	2.60667	0	-32.5043	-13.8675
			pub26	-0.65462	3.93749	1	-14.7304	13.4212				pub26	-27.58131*	2.60667	0	-36.8997	-18.2629
			pub25 pub26	-0.44318	3.93749	1	-14.519	13.6326				pub25 pub26	-49.69252*	2.60667	0	-59.0109	-40.3742
			PUB25-OX #37	-2.41416	3.93749	1	-16.4899	11.6616				PUB25-OX #37	-0.00295	2.60667	1	-9.3213	9.3154
			PUB25-OX #44	-3.41416	3.93749	0.998	-17.4899	10.6616				PUB25-OX #44	-2.22455	2.60667	0.998	-11.5429	7.0938
			PUB26-OX #1	-1.33481	3.93749	1	-15.4106	12.741				PUB26-OX #1	-3.38283	2.60667	0.96	-12.7012	5.9355
			PUB26-OX #2	-1.90551	3.93749	1	-15.9813	12.1703				PUB26-OX #2	-0.31166	2.60667	1	-9.63	9.0067
			PUB26-OX #15	-3.22786	3.93749	0.999	-17.3036	10.8479				PUB26-OX #15	-0.8787	2.60667	1	-10.1971	8.4397
		PUB25-OX #37	Col-0	-0.76559	3.93749	1	-14.8414	13.3102			PUB25-OX #37	Col-0	-27.62580*	2.60667	0	-36.9442	-18.3074
			atg1abct	1.8513	3.93749	1	-12.2245	15.9271				atg1abct	18.31205*	2.60667	0	8.9937	27.6304
			pub25	3.61251	3.93749	0.997	-10.4633	17.6883				pub25	-23.18296*	2.60667	0	-32.5013	-13.8646
			pub26	1.75954	3.93749	1	-12.3162	15.8353				pub26	-27.57836*	2.60667	0	-36.8967	-18.26
			pub25 pub26	1.97097	3.93749	1	-12.1048	16.0468				pub25 pub26	-49.68957*	2.60667	0	-59.0079	-40.3712
			PUB25-OX #1	2.41416	3.93749	1	-11.6616	16.4899				PUB25-OX #1	0.00295	2.60667	1	-9.3154	9.3213
			PUB25-OX #44	-1	3.93749	1	-15.0758	13.0758				PUB25-OX #44	-2.2216	2.60667	0.998	-11.54	7.0968
			PUB26-OX #1	1.07935	3.93749	1	-12.9964	15.1551				PUB26-OX #1	-3.37988	2.60667	0.96	-12.6982	5.9385
			PUB26-OX #2	0.50864	3.93749	1	-13.5671	14.5844				PUB26-OX #2	-0.30871	2.60667	1	-9.6271	9.0097
			PUB26-OX #15	-0.8137	3.93749	1	-14.8895	13.2621				PUB26-OX #15	-0.87575	2.60667	1	-10.1941	8.4426
		PUB25-OX #44	Col-0	0.23441	3.93749	1	-13.8414	14.3102			PUB25-OX #44	Col-0	-25.40419*	2.60667	0	-34.7226	-16.0858
			atg1abct	2.8513	3.93749	1	-11.2245	16.9271				atg1abct	20.53365*	2.60667	0	11.2153	29.852
			pub25	4.61251	3.93749	0.979	-9.4633	18.6883				pub25	-20.96136*	2.60667	0	-30.2797	-11.643
			pub26	2.75954	3.93749	1	-11.3162	16.8353				pub26	-25.35675*	2.60667	0	-34.6751	-16.0384
			pub25 pub26	2.97097	3.93749	0.999	-11.1048	17.0468				pub25 pub26	-47.46797*	2.60667	0	-56.7863	-38.1496
			PUB25-OX #1	3.41416	3.93749	0.998	-10.6616	17.4899				PUB25-OX #1	2.22455	2.60667	0.998	-7.0938	11.5429
			PUB25-OX #37	1	3.93749	1	-13.0758	15.0758				PUB25-OX #37	2.2216	2.60667	0.998	-7.0968	11.54
			PUB26-OX #1	2.07935	3.93749	1	-11.9964	16.1551				PUB26-OX #1	-1.15828	2.60667	1	-10.4766	8.1601
			PUB26-OX #2	1.50864	3.93749	1	-12.5671	15.5844				PUB26-OX #2	1.91289	2.60667	0.999	-7.4055	11.2313
			PUB26-OX #15	0.1863	3.93749	1	-13.8895	14.2621				PUB26-OX #15	1.34586	2.60667	1	-7.9725	10.6642
		PUB26-OX #1	Col-0	-1.84494	3.93749	1	-15.9207	12.2308			PUB26-OX #1	Col-0	-24.24591*	2.60667	0	-33.5643	-14.9275
			atg1abct	0.77195	3.93749	1	-13.3038	14.8477				atg1abct	21.69193*	2.60667	0	12.3736	31.0103
			pub25	2.53316	3.93749	1	-11.5426	16.6089				pub25	-19.80308*	2.60667	0	-29.1214	-10.4847
			pub26	0.68019	3.93749	1	-13.3956	14.756				pub26	-24.19847*	2.60667	0	-33.5168	-14.8801
			pub25 pub26	0.89163	3.93749	1	-13.1842	14.9674				pub25 pub26	-46.30969*	2.60667	0	-55.6281	-36.9913
			PUB25-OX #1	1.33481	3.93749	1	-12.741	15.4106				PUB25-OX #1	3.38283	2.60667	0.96	-5.9355	12.7012
			PUB25-OX #37	-1.07935	3.93749	1	-15.1551	12.9964				PUB25-OX #37	3.37988	2.60667	0.96	-5.9385	12.6982
			PUB25-OX #44	-2.07935	3.93749	1	-16.1551	11.9964				PUB25-OX #44	1.15828	2.60667	1	-8.1601	10.4766
			PUB26-OX #2	-0.5707	3.93749	1	-14.6465	13.5051				PUB26-OX #2	3.07117	2.60667	0.979	-6.2472	12.3895
			PUB26-OX #15	-1.89305	3.93749	1	-15.9688	12.1827				PUB26-OX #15	2.50413	2.60667	0.995	-6.8142	11.8225
		PUB26-OX #2	Col-0	-1.27423	3.93749	1	-15.35	12.8016			PUB26-OX #2	Col-0	-27.31708*	2.60667	0	-36.6354	-17.9987
			atg1abct	1.34265	3.93749	1	-12.7331	15.4184				atg1abct	18.62076*	2.60667	0	9.3024	27.9391
			pub25	3.10387	3.93749	0.999	-10.9719	17.1796				pub25	-22.87425*	2.60667	0	-32.1926	-13.5559
			pub26	1.2509	3.93749	1	-12.8249	15.3267				pub26	-27.26965*	2.60667	0	-36.588	-17.9513
			pub25 pub26	1.46233	3.93749	1	-12.6135	15.5381				pub25 pub26	-49.38086*	2.60667	0	-58.6992	-40.0625
			PUB25-OX #1	1.90551	3.93749	1	-12.1703	15.9813				PUB25-OX #1	0.31166	2.60667	1	-9.0067	9.63
			PUB25-OX #37	-0.50864	3.93749	1	-14.5844	13.5671				PUB25-OX #37	0.30871	2.60667	1	-9.0097	9.6271
			PUB25-OX #44	-1.50864	3.93749	1	-15.5844	12.5671				PUB25-OX #44	-1.91289	2.60667	0.999	-11.2313	7.4055
			PUB26-OX #1	0.5707	3.93749	1	-13.5051	14.6465				PUB26-OX #1	-3.07117	2.60667	0.979	-12.3895	6.2472
			PUB26-OX #15	-1.32235	3.93749	1	-15.3981	12.7534				PUB26-OX #15	-0.56704	2.60667	1	-9.8854	8.7513
		PUB26-OX #15	Col-0	0.04811	3.93749	1	-14.0277	14.1239			PUB26-OX #15	Col-0	-26.75005*	2.60667	0	-36.0684	-17.4317
			atg1abct	2.665	3.93749	1	-11.4108	16.7408				atg1abct	19.18779*	2.60667	0	9.8694	28.5062
			pub25	4.42621	3.93749	0.985	-9.6496	18.502				pub25	-22.30721*	2.60667	0	-31.6256	-12.9889
			pub26	2.57324	3.93749	1	-11.5025	16.649				pub26	-26.70261*	2.60667	0	-36.021	-17.3842
			pub25 pub26	2.78468	3.93749	1	-11.2911	16.8605				pub25 pub26	-48.81382*	2.60667	0	-58.1322	-39.4955
			PUB25-OX #1	3.22786	3.93749	0.999	-10.8479	17.3036				PUB25-OX #1	0.8787	2.60667	1	-8.4397	10.1971
			PUB25-OX #37	0.8137	3.93749	1	-13.2621	14.8895				PUB25-OX #37	0.87575	2.60667	1	-8.4426	10.1941
			PUB25-OX #44	-0.1863	3.93749	1	-14.2621	13.8895				PUB25-OX #44	-1.34586	2.60667	1	-10.6642	7.9725
			PUB26-OX #1	1.89305	3.93749	1	-12.1827	15.9688				PUB26-OX #1	-2.50413	2.60667	0.995	-11.8225	6.8142
			PUB26-OX #2	1.32235	3.93749	1	-12.7534	15.3981				PUB26-OX #2	0.56704	2.60667	1	-8.7513	9.8854
		Fig.1f
		-N				-N+DMSO				-N+ConA
		Col-0	pub25 pub26	PUB25-OX	PUB26-OX	Col-0	pub25 pub26	PUB25-OX	PUB26-OX	Col-0	pub25 pub26	PUB25-OX	PUB26-OX
		5	10	4	7	21	16	12	18	829	1054	454	392
		5	13	5	7	22	11	15	20	814	1205	481	395
		9	9	4	6	8	20	9	7	809	1192	529	380
		7	10	5	11	17	10	14	10	798	1211	520	409
		2	7	3	4	18	15	12	19	835	1244	459	412
		9	12	2	5	18	21	17	12	772	1178	486	364
		11	11	5	5	15	11	10	21	813	1244	522	357
		8	9	3	5	8	16	14	14	866	1208	488	423
		10	9	11	5	14	14	12	20	872	1204	542	412
		9	15	5	10	22	24	17	16	779	1208	459	405
		4	8	4	5	20	17	10	22	853	1212	513	345
		3	6	3	6	24	11	16	20	851	1206	511	379
		4	4	2	8	19	19	7	12	854	1200	441	359
		4	12	4	11	17	16	11	9	868	1213	426	407
		8	11	5	4	23	18	13	6	825	1243	518	410
		8	3	5	8	14	10	12	18	818	1197	474	380
		6	10	7	9	23	15	9	16	823	1266	468	404
		1	7	9	7	22	15	12	17	790	1192	480	342
		2	8	4	5	21	12	13	12	754	1180	398	426
		6	9	16	9	21	20	15	16	874	1169	523	456
		2	9	4	8	24	12	6	18	822	1207	460	412
		6	12	3	10	19	16	16	17	875	1198	466	358
		11	10	3	8	11	11	21	26	803	1145	527	424
		6	5	6	9	13	16	13	18	786	1206	511	420
		8	9	5	4	19	17	8	14	845	1168	422	432
		9	11	3	8	8	18	10	12	886	1259	442	380
		8	8	4	4	20	10	15	18	829	1208	489	444
		10	9	12	7	9	16	15	9	813	1208	498	356
		2	10	4	7	20	16	13	19	837	1237	488	393
		8	15	6	7	13	15	19	15	806	1195	490	376
		7	7	5	10	19	17	11	11	903	1195	503	404
		7	9	3	6	22	18	10	18	882	1330	534	363
		4	6	2	8	14	13	22	18	814	1148	559	405
		5	11	4	9	17	15	11	5	841	1190	546	440
		5	9	3	5	18	10	12	17	839	1251	526	440
		10	6	5	4	19	16	16	16	807	1186	494	402
		2	15	12	8	6	13	16	14	850	1126	498	418
		8	8	3	6	23	16	12	22	782	1209	497	423
		8	12	4	8	14	11	13	15	808	1149	475	415
		4	14	5	7	20	20	16	12	785	1200	477	438
		-N								-N+DMSO								-N+ConA
		Multiple Comparisons								Multiple Comparisons								Multiple Comparisons
		Dependent Variable:	VAR00003							Dependent Variable:	VAR00006							Dependent Variable:	VAR00008
		Tukey HSD								Tukey HSD								Tukey HSD
		(I) line		Mean Difference (I-J)	Std. Error	Sig.	95% Confidence Interval			(I) line		Mean Difference (I-J)	Std. Error	Sig.	95% Confidence Interval			(I) line		Mean Difference (I-J)	Std. Error	Sig.	95% Confidence Interval
							Lower Bound	Upper Bound							Lower Bound	Upper Bound							Lower Bound	Upper Bound
		+N Col-0	+N pub25 pub26	-3.17500*	0.602286	2.64107e-06	-4.7391	-1.6109		-N+DMSO Col-0	-N+DMSO pub25 pub26	2.2	0.932927	0.0896431	-0.222754	4.62275		-N+ConA Col-0	-N+ConA pub25 pub26	-373.27500*	8.08686	4.49085e-13	-394.276	-352.274
			+N PUB25-OX	1.225	0.602286	0.180061	-0.3391	2.7891			-N+DMSO PUB25-OX	4.25000*	0.932927	6.15263e-05	1.82725	6.67275			-N+ConA PUB25-OX	337.90000*	8.08686	4.49085e-13	316.899	358.901
			+N PUB26-OX	-0.725	0.602286	0.625398	-2.2891	0.8391			-N+DMSO PUB26-OX	1.9	0.932927	0.179108	-0.522754	4.32275			-N+ConA PUB26-OX	427.75000*	8.08686	4.49085e-13	406.749	448.751
		+N pub25 pub26	+N Col-0	3.17500*	0.602286	2.64107e-06	1.6109	4.7391		-N+DMSO pub25 pub26	-N+DMSO Col-0	-2.2	0.932927	0.0896431	-4.62275	0.222754		-N+ConA pub25 pub26	-N+ConA Col-0	373.27500*	8.08686	4.49085e-13	352.274	394.276
			+N PUB25-OX	4.40000*	0.602286	8.05989e-11	2.8359	5.9641			-N+DMSOPUB25-OX	2.05	0.932927	0.128477	-0.372754	4.47275			-N+ConA PUB25-OX	711.17500*	8.08686	4.49085e-13	690.174	732.176
			+N PUB26-OX	2.45000*	0.602286	0.000433236	0.8859	4.0141			-N+DMSO PUB26-OX	-0.3	0.932927	0.988462	-2.72275	2.12275			-N+ConA PUB26-OX	801.02500*	8.08686	4.49085e-13	780.024	822.026
		+N PUB25-OX	+N Col-0	-1.225	0.602286	0.180061	-2.7891	0.3391		-N+DMSO PUB25-OX	-N+DMSO Col-0	-4.25000*	0.932927	6.15263e-05	-6.67275	-1.82725		-N+ConA PUB25-OX	-N+ConA Col-0	-337.90000*	8.08686	4.49085e-13	-358.901	-316.899
			+N pub25 pub26	-4.40000*	0.602286	8.05989e-11	-5.9641	-2.8359			-N+DMSO pub25 pub26	-2.05	0.932927	0.128477	-4.47275	0.372754			-N+ConA pub25 pub26	-711.17500*	8.08686	4.49085e-13	-732.176	-690.174
			+N PUB26-OX	-1.95000*	0.602286	0.00794847	-3.5141	-0.3859			-N+DMSOPUB26-OX	-2.35	0.932927	0.0608891	-4.77275	0.072754			-N+ConA PUB26-OX	89.85000*	8.08686	4.49085e-13	68.8489	110.851
		+N PUB26-OX	+N Col-0	0.725	0.602286	0.625398	-0.8391	2.2891		-N+DMSO PUB26-OX	-N+DMSO Col-0	-1.9	0.932927	0.179108	-4.32275	0.522754		-N+ConA PUB26-OX	-N+ConA Col-0	-427.75000*	8.08686	4.49085e-13	-448.751	-406.749
			+N pub25 pub26	-2.45000*	0.602286	0.000433236	-4.0141	-0.8859			-N+DMSO pub25 pub26	0.3	0.932927	0.988462	-2.12275	2.72275			-N+ConA pub25 pub26	-801.02500*	8.08686	4.49085e-13	-822.026	-780.024
			+N PUB25-OX	1.95000*	0.602286	0.00794847	0.3859	3.5141			-N+DMSO PUB25-OX	2.35	0.932927	0.0608891	-0.072754	4.77275			-N+ConA PUB25-OX	-89.85000*	8.08686	4.49085e-13	-110.851	-68.8489
		*. The mean difference is significant at the 0.05 level.								*. The mean difference is significant at the 0.05 level.								*. The mean difference is significant at the 0.05 level.
	Fig.1g
		Col-0					pub25 pub26		pub25 26			pub25 pub26 vs Col-0
		R1	R2	R3	Mean	SD	R1	R2	R3	Mean	SD	t test p value
	0 h	0.580835	0.599489	0.642562	0.607629	0.0316583	0.737724	0.80221	0.773178	0.771037	0.0322964	0.00332501	**
	12 h	0.958772	0.979484	1.01043	0.982895	0.0259955	1.95087	1.94619	1.86392	1.92033	0.0489068	8.06116e-06	***
	24 h	1.21494	1.20178	1.15169	1.18947	0.0333747	3.4306	3.35376	3.12852	3.30429	0.156999	2.18399e-05	***
	36 h	1.74724	1.64352	1.6504	1.68039	0.0580026	3.73929	3.83086	4.40926	3.99314	0.363272	0.000403789	***
	48 h	2.98677	3.03205	2.9734	2.99741	0.0307368	4.01369	3.7369	3.83257	3.86105	0.14058	0.000483606	***
	Fig.1h
		Col-0					PUB25-OX		pub25 26			PUB25-OX vs Col-0		PUB26-OX					PUB26-OX vs Col-0
		R1	R2	R3	Mean	SD	R1	R2	R3	Mean	SD	t test p value		R1	R2	R3	Mean	SD	t test p value
	0 h	1.00047	1.00081	1.00029	1.00052	0.000261078	0.914024	0.896528	0.922764	0.911105	0.0133593	0.000316527	***	0.9823	0.985707	1.00055	0.989519	0.00970309	0.121025	ns
	24 h	1.66735	1.65376	1.69026	1.67046	0.0184448	1.49488	1.48857	1.52509	1.50285	0.0195213	0.000415485	***	1.69324	1.67521	1.70175	1.69007	0.0135505	0.211905	ns
	36 h	2.9707	3.02763	2.95853	2.98562	0.0368859	2.59891	2.59195	2.67199	2.62095	0.0443377	0.000394905	***	2.23537	2.15084	2.23096	2.20572	0.0475814	2.3363e-05	***
	48 h	6.704	6.42203	6.70858	6.61154	0.164132	3.21335	3.15964	3.19647	3.18982	0.0274642	3.71029e-06	***	2.72831	2.66514	2.71763	2.70369	0.0338128	2.24522e-06	***
	Fig.1i
		Col-0					pub25 pub26		pub25 26			pub25 pub26 vs Col-0
		R1	R2	R3	Mean	SD	R1	R2	R3	Mean	SD	t test p value
	0 h	0.997652	1.00092	1.00636	1.00164	0.00439669	0.988517	0.861071	0.944671	0.93142	0.0647478	0.134183	ns
	24 h	1.45685	1.63609	1.47909	1.52401	0.0976971	2.53373	2.64446	2.24806	2.47541	0.204532	0.00190159	**
	36 h	2.54063	2.50547	2.33201	2.45937	0.11169	5.0031	5.01396	3.60192	4.53966	0.812123	0.0117336	*
	48 h	3.17744	3.32806	2.86044	3.12198	0.238689	4.14723	4.51527	3.71561	4.12604	0.400251	0.0202655	*
	Fig.1j
		Col-0					PUB25-OX		pub25 26			PUB25-OX vs Col-0		PUB26-OX					PUB26-OX vs Col-0
		R1	R2	R3	Mean	SD	R1	R2	R3	Mean	SD	t test p value		R1	R2	R3	Mean	SD	t test p value
	0 h	1	1.00026	1.00004	1.0001	0.000137636	0.640592	0.639843	0.627816	0.636084	0.00716971	1.0032e-07	***	0.224325	0.272406	0.246987	0.247906	0.0240532	6.95553e-07	***
	24 h	1.08586	1.38873	1.17352	1.21604	0.155849	0.444183	0.466936	0.448234	0.453118	0.0121371	0.00107296	**	0.358212	0.370348	0.328321	0.352293	0.0216296	0.000682941	***
	36 h	1.78894	1.73739	1.39612	1.64082	0.21348	1.09126	1.18691	1.0101	1.09609	0.0885052	0.015066	*	0.67114	0.757657	0.672735	0.700511	0.0494967	0.00175008	**
	48 h	1.61792	1.51856	1.28457	1.47368	0.171149	0.828959	0.830258	0.724803	0.794673	0.060513	0.00292549	**	1.00082	1.15664	0.987113	1.04819	0.0941693	0.0195592	*

## Sheet: Fig.3
	Fig.3d
		Col-0					pub25 pub26		pub25 26			pub25 pub26 vs Col-0
		R1	R2	R3	Mean	SD	R1	R2	R3	Mean	SD	t test p value
	0 min	1.00004	1.00028	1.0004	1.00024	0.000184186	1	1.00003	1.00028	1.00011	0.000152008	0.388285	ns
	5 min	0.641829	0.765639	0.740929	0.716132	0.0655239	1.03981	0.809906	1.0246	0.958105	0.128569	0.0439255	*
	15 min	0.330843	0.411061	0.334763	0.358889	0.0452248	0.772281	0.699647	0.925022	0.798983	0.115036	0.00351034	**
	30 min	0.272449	0.294576	0.294451	0.287159	0.0127391	0.613127	0.673941	0.673483	0.653517	0.0349795	6.94733e-05	***
	60 min	0.277685	0.296152	0.309221	0.294353	0.0158448	0.434668	0.491158	0.532551	0.486126	0.0491352	0.00300167	**
	Fig.3e
		Col-0					pub25 pub26		pub25 26			pub25 pub26 vs Col-0
		R1	R2	R3	Mean	SD	R1	R2	R3	Mean	SD	t test p value
	0 h	1.00004	1.00054	1.00019	1.00026	0.000256373	1.00002	1.00007	1.00053	1.00021	0.000277752	0.831126	ns
	36 h	0.821157	0.683005	0.834155	0.779439	0.0837668	0.972737	1.13737	1.12505	1.07838	0.091699	0.0140428	*
	48 h	0.539666	0.467465	0.513505	0.506879	0.0365538	0.592998	0.665066	0.611847	0.623304	0.037375	0.0181893	*
	72 h	0.554949	0.459182	0.470639	0.494923	0.0522984	0.635245	0.776019	0.708661	0.706642	0.0704087	0.0139066	*
	Fig.3f
		Col-0					pub25 pub26		pub25 26			pub25 pub26 vs Col-0
		R1	R2	R3	Mean	SD	R1	R2	R3	Mean	SD	t test p value
	0 h	1.00043	1.00023	1.00019	1.00028	0.000132296	1.00066	1.00004	1.00048	1.00039	0.000319005	0.606365	ns
	36 h	0.659487	0.558633	0.755865	0.657995	0.0986245	0.847725	0.935579	0.825213	0.869506	0.0583178	0.0329823	*
	48 h	0.442965	0.424898	0.463916	0.443926	0.0195268	0.75389	0.760151	0.693478	0.73584	0.0368196	0.000264887	***
	72 h	0.267708	0.211164	0.250852	0.243241	0.0290301	0.405519	0.490424	0.388478	0.42814	0.0546081	0.00661382	**
	Fig.3h
		Col-0			atg1abct			ATG1a-OX #1			ATG1a-OX #2			PUB25-OX			PUB26-OX			PUB25-OX × ATG1a-OX			PUB26-OX × ATG1a-OX
		R1	R2	R3	R1	R2	R3	R1	R2	R3	R1	R2	R3	R1	R2	R3	R1	R2	R3	R1	R2	R3	R1	R2	R3
	+N	1.58802	1.52169	1.61927	1.53663	1.49989	1.61237	1.55469	1.69792	1.51794	1.60986	1.52551	1.6835	1.67063	1.43883	1.55635	1.44508	1.66112	1.55696	1.64796	1.59319	1.62087	1.44394	1.49642	1.59944
	-N	0.358246	0.376143	0.320883	0.227804	0.201075	0.208329	0.356647	0.347635	0.322121	0.379482	0.321103	0.365887	0.265588	0.27171	0.282839	0.267976	0.281555	0.299338	0.359972	0.332686	0.369379	0.376049	0.347288	0.352428
	+N											-N
	Tukey HSD											Tukey HSD
	(I) VAR00001	(J) VAR00001	Mean Difference (I-J)	Std. Error	Sig.	95% Confidence Interval						(I) VAR00001	(J) VAR00001	Mean Difference (I-J)	Std. Error	Sig.	95% Confidence Interval
						Lower Bound	Upper Bound										Lower Bound	Upper Bound
	Col-0	atg1abct	0.0266989	0.0665705	0.999881	-0.203778	0.257176					Col-0	atg1abct	.13935*	0.0162332	4.94553e-06	0.0831531	0.195557
		ATG1a-OX #1	-0.0138541	0.0665705	0.999999	-0.244331	0.216623						ATG1a-OX #1	0.00962322	0.0162332	0.998488	-0.0465785	0.065825
		ATG1a-OX #2	-0.0299619	0.0665705	0.999745	-0.260439	0.200515						ATG1a-OX #2	-0.00373328	0.0162332	0.999997	-0.059935	0.0524685
		PUB25-OX	0.0210572	0.0665705	0.999976	-0.20942	0.251534						PUB25-OX	.07838*	0.0162332	0.00356428	0.0221772	0.134581
		PUB26-OX	0.0219416	0.0665705	0.999968	-0.208536	0.252419						PUB26-OX	.06880*	0.0162332	0.0112499	0.0125999	0.125003
		PUB25-OX × ATG1a-OX	-0.0443456	0.0665705	0.996874	-0.274823	0.186132						PUB25-OX × ATG1a-OX	-0.00225493	0.0162332	1	-0.0584567	0.0539468
		PUB26-OX × ATG1a-OX	0.0630612	0.0665705	0.975867	-0.167416	0.293538						PUB26-OX × ATG1a-OX	-0.0068308	0.0162332	0.999837	-0.0630325	0.049371
	atg1abct	Col-0	-0.0266989	0.0665705	0.999881	-0.257176	0.203778					atg1abct	Col-0	-.13935*	0.0162332	4.94553e-06	-0.195557	-0.0831531
		ATG1a-OX #1	-0.040553	0.0665705	0.998206	-0.27103	0.189924						ATG1a-OX #1	-.12973*	0.0162332	1.25217e-05	-0.185933	-0.0735299
		ATG1a-OX #2	-0.0566608	0.0665705	0.986657	-0.287138	0.173816						ATG1a-OX #2	-.14309*	0.0162332	3.48684e-06	-0.19929	-0.0868864
		PUB25-OX	-0.00564174	0.0665705	1	-0.236119	0.224835						PUB25-OX	-.06098*	0.0162332	0.0286228	-0.117178	-0.00477421
		PUB26-OX	-0.00475727	0.0665705	1	-0.235234	0.22572						PUB26-OX	-.07055*	0.0162332	0.00911482	-0.126755	-0.0143515
		PUB25-OX × ATG1a-OX	-0.0710445	0.0665705	0.955001	-0.301522	0.159433						PUB25-OX × ATG1a-OX	-.14161*	0.0162332	4.00152e-06	-0.197812	-0.0854081
		PUB26-OX × ATG1a-OX	0.0363623	0.0665705	0.999102	-0.194115	0.26684						PUB26-OX × ATG1a-OX	-.14619*	0.0162332	2.62092e-06	-0.202387	-0.0899839
	ATG1a-OX #1	Col-0	0.0138541	0.0665705	0.999999	-0.216623	0.244331					ATG1a-OX #1	Col-0	-0.00962322	0.0162332	0.998488	-0.065825	0.0465785
		atg1abct	0.040553	0.0665705	0.998206	-0.189924	0.27103						atg1abct	.12973*	0.0162332	1.25217e-05	0.0735299	0.185933
		ATG1a-OX #2	-0.0161078	0.0665705	0.999996	-0.246585	0.214369						ATG1a-OX #2	-0.0133565	0.0162332	0.989003	-0.0695582	0.0428453
		PUB25-OX	0.0349113	0.0665705	0.999309	-0.195566	0.265388						PUB25-OX	.06876*	0.0162332	0.011312	0.012554	0.124957
		PUB26-OX	0.0357957	0.0665705	0.999188	-0.194681	0.266273						PUB26-OX	.05918*	0.0162332	0.0353663	0.00297664	0.11538
		PUB25-OX × ATG1a-OX	-0.0304915	0.0665705	0.999714	-0.260969	0.199986						PUB25-OX × ATG1a-OX	-0.0118781	0.0162332	0.994475	-0.0680799	0.0443236
		PUB26-OX × ATG1a-OX	0.0769153	0.0665705	0.933521	-0.153562	0.307393						PUB26-OX × ATG1a-OX	-0.016454	0.0162332	0.965448	-0.0726558	0.0397477
	ATG1a-OX #2	Col-0	0.0299619	0.0665705	0.999745	-0.200515	0.260439					ATG1a-OX #2	Col-0	0.00373328	0.0162332	0.999997	-0.0524685	0.059935
		atg1abct	0.0566608	0.0665705	0.986657	-0.173816	0.287138						atg1abct	.14309*	0.0162332	3.48684e-06	0.0868864	0.19929
		ATG1a-OX #1	0.0161078	0.0665705	0.999996	-0.214369	0.246585						ATG1a-OX #1	0.0133565	0.0162332	0.989003	-0.0428453	0.0695582
		PUB25-OX	0.051019	0.0665705	0.992726	-0.179458	0.281496						PUB25-OX	.08211*	0.0162332	0.00228476	0.0259105	0.138314
		PUB26-OX	0.0519035	0.0665705	0.991953	-0.178574	0.282381						PUB26-OX	.07253*	0.0162332	0.00718314	0.0163331	0.128737
		PUB25-OX × ATG1a-OX	-0.0143837	0.0665705	0.999998	-0.244861	0.216093						PUB25-OX × ATG1a-OX	0.00147835	0.0162332	1	-0.0547234	0.0576801
		PUB26-OX × ATG1a-OX	0.0930231	0.0665705	0.84588	-0.137454	0.3235						PUB26-OX × ATG1a-OX	-0.00309752	0.0162332	0.999999	-0.0592993	0.0531042
	PUB25-OX	Col-0	-0.0210572	0.0665705	0.999976	-0.251534	0.20942					PUB25-OX	Col-0	-.07838*	0.0162332	0.00356428	-0.134581	-0.0221772
		atg1abct	0.00564174	0.0665705	1	-0.224835	0.236119						atg1abct	.06098*	0.0162332	0.0286228	0.00477421	0.117178
		ATG1a-OX #1	-0.0349113	0.0665705	0.999309	-0.265388	0.195566						ATG1a-OX #1	-.06876*	0.0162332	0.011312	-0.124957	-0.012554
		ATG1a-OX #2	-0.051019	0.0665705	0.992726	-0.281496	0.179458						ATG1a-OX #2	-.08211*	0.0162332	0.00228476	-0.138314	-0.0259105
		PUB26-OX	0.000884468	0.0665705	1	-0.229593	0.231362						PUB26-OX	-0.00957734	0.0162332	0.998533	-0.0657791	0.0466244
		PUB25-OX × ATG1a-OX	-0.0654028	0.0665705	0.970671	-0.29588	0.165074						PUB25-OX × ATG1a-OX	-.08063*	0.0162332	0.00272369	-0.136836	-0.0244321
		PUB26-OX × ATG1a-OX	0.0420041	0.0665705	0.997765	-0.188473	0.272481						PUB26-OX × ATG1a-OX	-.08521*	0.0162332	0.00158397	-0.141411	-0.029008
	PUB26-OX	Col-0	-0.0219416	0.0665705	0.999968	-0.252419	0.208536					PUB26-OX	Col-0	-.06880*	0.0162332	0.0112499	-0.125003	-0.0125999
		atg1abct	0.00475727	0.0665705	1	-0.22572	0.235234						atg1abct	.07055*	0.0162332	0.00911482	0.0143515	0.126755
		ATG1a-OX #1	-0.0357957	0.0665705	0.999188	-0.266273	0.194681						ATG1a-OX #1	-.05918*	0.0162332	0.0353663	-0.11538	-0.00297664
		ATG1a-OX #2	-0.0519035	0.0665705	0.991953	-0.282381	0.178574						ATG1a-OX #2	-.07253*	0.0162332	0.00718314	-0.128737	-0.0163331
		PUB25-OX	-0.000884468	0.0665705	1	-0.231362	0.229593						PUB25-OX	0.00957734	0.0162332	0.998533	-0.0466244	0.0657791
		PUB25-OX × ATG1a-OX	-0.0662873	0.0665705	0.968517	-0.296764	0.16419						PUB25-OX × ATG1a-OX	-.07106*	0.0162332	0.00857987	-0.127258	-0.0148548
		PUB26-OX × ATG1a-OX	0.0411196	0.0665705	0.998043	-0.189358	0.271597						PUB26-OX × ATG1a-OX	-.07563*	0.0162332	0.00495209	-0.131834	-0.0194306
	PUB25-OX × ATG1a-OX	Col-0	0.0443456	0.0665705	0.996874	-0.186132	0.274823					PUB25-OX × ATG1a-OX	Col-0	0.00225493	0.0162332	1	-0.0539468	0.0584567
		atg1abct	0.0710445	0.0665705	0.955001	-0.159433	0.301522						atg1abct	.14161*	0.0162332	4.00152e-06	0.0854081	0.197812
		ATG1a-OX #1	0.0304915	0.0665705	0.999714	-0.199986	0.260969						ATG1a-OX #1	0.0118781	0.0162332	0.994475	-0.0443236	0.0680799
		ATG1a-OX #2	0.0143837	0.0665705	0.999998	-0.216093	0.244861						ATG1a-OX #2	-0.00147835	0.0162332	1	-0.0576801	0.0547234
		PUB25-OX	0.0654028	0.0665705	0.970671	-0.165074	0.29588						PUB25-OX	.08063*	0.0162332	0.00272369	0.0244321	0.136836
		PUB26-OX	0.0662873	0.0665705	0.968517	-0.16419	0.296764						PUB26-OX	.07106*	0.0162332	0.00857987	0.0148548	0.127258
		PUB26-OX × ATG1a-OX	0.107407	0.0665705	0.736696	-0.12307	0.337884						PUB26-OX × ATG1a-OX	-0.00457587	0.0162332	0.999989	-0.0607776	0.0516259
	PUB26-OX × ATG1a-OX	Col-0	-0.0630612	0.0665705	0.975867	-0.293538	0.167416					PUB26-OX × ATG1a-OX	Col-0	0.0068308	0.0162332	0.999837	-0.049371	0.0630325
		atg1abct	-0.0363623	0.0665705	0.999102	-0.26684	0.194115						atg1abct	.14619*	0.0162332	2.62092e-06	0.0899839	0.202387
		ATG1a-OX #1	-0.0769153	0.0665705	0.933521	-0.307393	0.153562						ATG1a-OX #1	0.016454	0.0162332	0.965448	-0.0397477	0.0726558
		ATG1a-OX #2	-0.0930231	0.0665705	0.84588	-0.3235	0.137454						ATG1a-OX #2	0.00309752	0.0162332	0.999999	-0.0531042	0.0592993
		PUB25-OX	-0.0420041	0.0665705	0.997765	-0.272481	0.188473						PUB25-OX	.08521*	0.0162332	0.00158397	0.029008	0.141411
		PUB26-OX	-0.0411196	0.0665705	0.998043	-0.271597	0.189358						PUB26-OX	.07563*	0.0162332	0.00495209	0.0194306	0.131834
		PUB25-OX × ATG1a-OX	-0.107407	0.0665705	0.736696	-0.337884	0.12307						PUB25-OX × ATG1a-OX	0.00457587	0.0162332	0.999989	-0.0516259	0.0607776

## Sheet: Fig.4
	Fig.4a
			R1	R2	R3	Mean	SD	t test p value
	PUB25-MYC	0 h	1.00004	1.00035	1.00014	1.00018	0.000156771
		24 h	1.0549	1.14592	1.1438	1.11487	0.051949	0.0187142	*
		36 h	1.19078	1.18422	1.16649	1.1805	0.0125664	1.55616e-05	***
		48 h	1.0585	0.957176	1.02859	1.01475	0.0520577	0.653076	ns
	PUB26-MYC	0 h	1.00048	1.00005	1.00025	1.00026	0.000214913
		24 h	1.14123	1.10635	1.15439	1.13399	0.0248246	0.000734503	***
		36 h	1.11891	1.08858	1.15282	1.1201	0.0321382	0.00295897	**
		48 h	1.09412	1.16637	1.15699	1.13916	0.0392867	0.00360227	**
	Fig.4b
			R1	R2	R3	Mean	SD	t test p value
	PUB25-MYC	0 h	1	1	1	1	1.02278e-07
		24 h	1.66797	1.6978	1.66647	1.67741	0.0176696	3.08146e-07	***
		36 h	2.6229	2.89491	2.68087	2.7329	0.143274	3.06846e-05	***
		48 h	4.32425	4.25502	4.06879	4.21602	0.13212	1.89181e-06	***
	PUB26-MYC	0 h	1	1	1	1	1.08806e-07
		24 h	1.31245	1.35644	1.52939	1.39943	0.11468	0.00380595	**
		36 h	2.37732	2.34051	2.54259	2.42014	0.107633	2.17194e-05	***
		48 h	3.21371	3.3205	3.56108	3.3651	0.177925	2.10875e-05	***
	Fig.4i
			R1	R2	R3	Mean	SD	t test p value
	PUB25-MYC	0 h	0.438068	0.425988	0.482917	0.448991	0.0299953
		48 h	0.806512	0.897132	1.01576	0.906469	0.104937	0.00191136	**
	PUB26-MYC	0 h	0.2855	0.368281	0.337795	0.330526	0.0418666
		48 h	0.749896	0.754028	0.783284	0.762403	0.0182015	8.12083e-05	***

## Sheet: Fig.5
	Fig.5f
		R1	R2	R3	Mean	SD	t test p value
	0 h	1	0.999997	0.999999	1	2.65215e-06
	12 h	1.08789	1.10064	1.10552	1.09802	0.00910351	4.86728e-05	***
	24 h	1.15882	1.21558	1.18509	1.18649	0.0284086	0.000341171	***
	36 h	1.3538	1.36289	1.39197	1.36956	0.0199397	5.61383e-06	***
	48 h	1.68247	1.68368	1.76486	1.71033	0.0472238	1.28957e-05	***
	72 h	1.82363	1.81813	1.88163	1.84113	0.0351798	2.03209e-06	***
	Fig.5g
		R1	R2	R3	Mean	SD	t test p value
	0 h	0.904957	1.01028	1.08476	1	0.0903406
	6 h	1.23105	1.40036	1.28585	1.30575	0.0863889	0.0132984	*	0.0132984
	12 h	1.56113	1.76651	1.69495	1.67419	0.104251	0.00106727	**	0.00106727
	24 h	1.97109	2.09684	2.00855	2.02549	0.0645661	8.93071e-05	***	8.93071e-05
	36 h	1.66954	1.75038	1.82506	1.74833	0.0777791	0.000406154	***	0.000406154
	48 h	1.60749	1.53463	1.44361	1.52858	0.0821083	0.00169135	**	0.00169135
	Fig.5k
			R1	R2	R3	Mean	SD	t test p value
	PUB26-FLAG DMSO	0 h	0.97934	1.00466	1.01031	0.998102	0.0164934
		48 h	3.09263	3.34956	2.72738	3.05652	0.312655	0.00033919	***	PUB26-FLAG DMSO 0 h vs. PUB26-FLAG DMSO 48 h
	PUB26-FLAG Reversine	0 h	1.14584	1.37006	1.22333	1.24641	0.113878	0.0201625	*	PUB26-FLAG DMSO 0 h vs. PUB26-FLAG Reversine 0 h
		48 h	1.26818	1.50777	1.44067	1.40554	0.1236	0.00104792	**	PUB26-FLAG DMSO 48 h vs. PUB26-FLAG Reversine 48 h
	Fig.5l
			R1	R2	R3	Mean	SD	t test p value
	PUB26-FLAG/Col-0	0 h	0.992852	0.999627	0.985306	0.992595	0.00716357
		36 h	1.51868	1.57601	1.52951	1.5414	0.0304568
		48 h	2.07823	2.37505	2.3069	2.25339	0.155473
	PUB26-FLAG/fer-4	0h	0.887556	0.823028	0.750027	0.820204	0.0688079	0.0124853	*	PUB26-FLAG/fer-4 0 h vs. PUB26-FLAG/Col-0 0 h
		36 h	1.46677	1.40693	1.34883	1.40751	0.0589707	0.0250279	*	PUB26-FLAG/fer-4 36 h vs. PUB26-FLAG/Col-0 36 h
		48 h	1.01597	1.04413	0.99996	1.02002	0.0223598	0.000169213	***	PUB26-FLAG/fer-4 48 h vs. PUB26-FLAG/Col-0 48 h

## Sheet: Fig.6
	Fig.6e
		PUB26					PUB26T94A					PUB26T94A vs. PUB26		PUB26T94D					PUB26T94D vs. PUB26
		R1	R2	R3	Mean	SD	R1	R2	R3	Mean	SD	t test p value		R1	R2	R3	Mean	SD	t test p value
	0 h	1.00156	0.997836	1.00161	1.00033	0.00216381	1.41545	1.27488	0.996524	1.22895	0.213205	0.136851	ns	2.00047	1.95435	1.73892	1.89791	0.139611	0.000370262	***
	36 h	0.995031	0.966391	0.939027	0.966816	0.0280043	0.995881	0.966256	0.885486	0.949208	0.0571385	0.656752	ns	0.642108	0.640375	0.756965	0.679816	0.0668184	0.00236262	**
	48 h	0.654686	0.762569	0.835236	0.75083	0.0908458	1.12737	1.02956	0.972973	1.0433	0.0781124	0.0133895	*	0.414176	0.401152	0.585467	0.466931	0.102861	0.0231034	*
	72 h	0.574255	0.56927	0.768929	0.637485	0.113861	0.841584	0.815701	0.905299	0.854194	0.0461108	0.0378235	*	0.426134	0.369754	0.571687	0.455858	0.104196	0.111165	ns
	Fig.6g
		Col-0					fer-4					fer-4 vs. Col-0
		R1	R2	R3	Mean	SD	R1	R2	R3	Mean	SD	t test p value
	0 h	1.0009	0.997319	0.999479	0.999231	0.0018019	1.23071	1.34142	1.11529	1.22914	0.11307	0.0244197	*
	36 h	1.01803	0.990021	0.853668	0.953907	0.0879324	1.41426	1.70436	1.18859	1.43574	0.258551	0.037809	*
	48 h	0.468187	0.442528	0.451759	0.454158	0.0129969	1.29458	1.69315	1.2746	1.42078	0.23609	0.00209979	**
	72 h	0.483123	0.518776	0.371279	0.457726	0.0769583	0.86674	1.15321	0.974203	0.998051	0.144716	0.0046527	**

## Sheet: Fig.7
		Fig.7b
			+N		-N+DMSO		-N+ConA
			Col-0	fer-4	Col-0	fer-4	Col-0	fer-4
			5	18	10	51	865	1276
			10	22	4	53	905	1361
			4	26	12	55	884	1418
			2	12	4	61	791	1269
			5	26	6	45	998	1265
			9	19	8	44	886	1208
			2	16	6	49	1017	1399
			9	23	11	43	977	1383
			5	16	2	53	932	1396
			3	14	7	54	1048	1332
			4	23	5	48	963	1260
			4	20	12	59	990	1457
			9	24	11	70	919	1286
			9	27	13	60	887	1440
			9	21	6	59	947	1357
			8	30	3	56	1000	1208
			5	23	12	47	835	1313
			3	25	11	61	965	1231
			1	24	8	53	1031	1121
			8	25	6	65	1108	1335
			10	25	8	46	800	1244
			3	27	8	53	918	1365
			5	14	7	48	1055	1262
			8	32	9	52	1104	1148
			4	16	13	60	915	1343
			6	18	6	45	1023	1398
			9	18	8	56	825	1092
			6	17	11	61	1032	1283
			6	15	8	46	773	1243
			2	21	5	48	1014	1339
			4	14	5	54	945	1320
			7	23	9	40	953	1257
			6	19	3	42	1210	1270
			5	15	9	47	933	1271
			3	21	7	38	913	1234
			4	17	4	52	992	1307
			7	24	9	55	1006	1371
			9	24	3	35	968	1195
			6	36	11	38	976	1197
			3	24	8	58	985	1379
		Mean	5.675	21.35	7.7	51.5	957.2	1295.83
		SD	2.54586	5.30384	3.02299	7.84138	89.3785	85.343
		t test p value		1.31552e-23		9.59596e-36		1.81059e-28
		Significant differences		***		***		***
		Fig.7c
			Col-0					fer-4					fer-4 vs Col-0
			R1	R2	R3	Mean	SD	R1	R2	R3	Mean	SD	t test p value
		0 h	0.0962887	0.101888	0.0761875	0.0914546	0.0135147	0.357528	0.389125	0.368907	0.371853	0.0160034	2.05063e-05	***
		24 h	0.529216	0.658558	0.640107	0.609293	0.0699602	2.65079	2.32943	2.41592	2.46538	0.166291	5.82748e-05	***
		36 h	1.93919	1.87531	1.87508	1.89653	0.0369465	6.47488	6.22314	6.82509	6.5077	0.302313	1.25652e-05	***
		48 h	2.40788	2.25829	2.22837	2.29818	0.0961776	6.98867	6.92677	6.67544	6.86363	0.165885	2.06638e-06	***
		Fig.7d
			Col-0					fer-4					fer-4 vs Col-0
			R1	R2	R3	Mean	SD	R1	R2	R3	Mean	SD	t test p value
		0 h	1.00009	1.00068	1	1.00026	0.000368825	1.31599	1.23652	1.14064	1.23105	0.0878032	0.0103965	*
		24 h	1.40174	1.22553	1.28279	1.30335	0.0898853	2.05374	2.25643	1.79811	2.03609	0.229671	0.0067638	**
		36 h	1.28044	1.15791	1.22531	1.22122	0.061368	1.9746	2.00258	1.95322	1.9768	0.0247512	3.85559e-05	***
		48 h	1.59233	1.53289	1.52786	1.55103	0.0358588	3.38172	3.22663	2.78703	3.13179	0.308481	0.000913385	***
		Fig.7f
				R1	R2	R3	Mean	SD
			Col-0	1.93237	1.97848	2.14291	2.01792	0.110671
		+N	atg5-1	2.0207	2.11848	2.58251	2.24056	0.300143
			pub25 pub26	2.2439	2.29817	1.99781	2.17996	0.160064
			pub PUB26 #9	2.46755	2.12226	1.97872	2.18951	0.251257
			pub PUB26 #11	2.22192	1.85488	1.97033	2.01571	0.187681
			pub PUB26 #14	2.14383	2.13207	2.05948	2.11179	0.0456863
			pub PUB26T94A #11	1.72262	1.88712	1.83122	1.81365	0.0836411
			pub PUB26T94A #13	2.03093	1.66621	1.86265	1.85326	0.182543
			pub PUB26T94A #18	2.14354	1.69307	1.86774	1.90145	0.227123
			pub PUB26T94D #10	1.82738	1.94357	1.90252	1.89116	0.0589201
			pub PUB26T94D #14	1.82962	1.78713	2.18763	1.93479	0.219993
			pub PUB26T94D #15	2.03562	1.98279	2.01824	2.01222	0.0269259
		-N	Col-0	0.226339	0.199562	0.246977	0.224293	0.0237734
			atg5-1	0.0829112	0.11519	0.065841	0.0879806	0.0250619
			pub25 pub26	0.299753	0.317197	0.345309	0.320753	0.0229853
			pub PUB26 #9	0.21499	0.210069	0.214259	0.213106	0.00265534
			pub PUB26 #11	0.236789	0.202842	0.234335	0.224656	0.0189306
			pub PUB26 #14	0.199854	0.211883	0.205673	0.205803	0.00601529
			pub PUB26T94A #11	0.279379	0.334903	0.328365	0.314216	0.0303459
			pub PUB26T94A #13	0.351349	0.279483	0.322095	0.317642	0.0361394
			pub PUB26T94A #18	0.305144	0.265331	0.329497	0.299991	0.0323919
			pub PUB26T94D #10	0.0780036	0.0650642	0.0977468	0.0802715	0.0164589
			pub PUB26T94D #14	0.0923059	0.156265	0.100244	0.116272	0.0348621
			pub PUB26T94D #15	0.0817288	0.0788217	0.102812	0.0877876	0.0130927
	+N								-N
	Multiple Comparisons								Multiple Comparisons
	Dependent Variable:	VAR00002							Dependent Variable:	VAR00003
	Tukey HSD								Tukey HSD
	(I) VAR00001		Mean Difference (I-J)	Std. Error	Sig.	95% Confidence Interval			(I) VAR00001		Mean Difference (I-J)	Std. Error	Sig.	95% Confidence Interval
						Lower Bound	Upper Bound							Lower Bound	Upper Bound
	Col-0 +N	atg5-1 +N	-0.222641	0.143931	0.911717	-0.741604	0.296323		Col-0 -N	atg5-1 -N	.13631*	0.0198005	2.20018e-05	0.0649189	0.207705
		pub25 pub26 +N	-0.16204	0.143931	0.990069	-0.681003	0.356923			pub25 pub26 -N	-.09646*	0.0198005	0.00267476	-0.167853	-0.0250671
		pub PUB26 #9 +N	-0.171592	0.143931	0.984607	-0.690555	0.347371			pub PUB26 #9 -N	0.0111868	0.0198005	0.999982	-0.0602063	0.0825799
		pub PUB26 #11 +N	0.00220824	0.143931	1	-0.516755	0.521171			pub PUB26 #11 -N	-0.000362939	0.0198005	1	-0.071756	0.0710302
		pub PUB26 #14 +N	-0.0938756	0.143931	0.999924	-0.612839	0.425088			pub PUB26 #14 -N	0.0184893	0.0198005	0.997877	-0.0529038	0.0898824
		pub PUB26T94A #11 +N	0.204266	0.143931	0.948008	-0.314697	0.723229			pub PUB26T94A #11 -N	-.08992*	0.0198005	0.0058898	-0.161316	-0.0185301
		pub PUB26T94A #13 +N	0.164656	0.143931	0.988755	-0.354307	0.683619			pub PUB26T94A #13 -N	-.09335*	0.0198005	0.00389869	-0.164743	-0.0219564
		pub PUB26T94A #18 +N	0.116469	0.143931	0.999409	-0.402495	0.635432			pub PUB26T94A #18 -N	-.07570*	0.0198005	0.0310388	-0.147091	-0.00430512
		pub PUB26T94D #10 +N	0.126763	0.143931	0.99873	-0.3922	0.645726			pub PUB26T94D #10 -N	.14402*	0.0198005	9.00635e-06	0.0726281	0.215414
		pub PUB26T94D #14 +N	0.0831267	0.143931	0.999977	-0.435837	0.60209			pub PUB26T94D #14 -N	.10802*	0.0198005	0.000654121	0.0366281	0.179414
		pub PUB26T94D #15 +N	0.00570302	0.143931	1	-0.51326	0.524666			pub PUB26T94D #15 -N	.13651*	0.0198005	2.15108e-05	0.065112	0.207898
	atg5-1 +N	Col-0 +N	0.222641	0.143931	0.911717	-0.296323	0.741604		atg5-1 -N	Col-0 -N	-.13631*	0.0198005	2.20018e-05	-0.207705	-0.0649189
		pub25 pub26 +N	0.0606005	0.143931	0.999999	-0.458363	0.579564			pub25 pub26 -N	-.23277*	0.0198005	1.13725e-09	-0.304165	-0.161379
		pub PUB26 #9 +N	0.0510488	0.143931	1	-0.467914	0.570012			pub PUB26 #9 -N	-.12513*	0.0198005	8.26365e-05	-0.196518	-0.0537321
		pub PUB26 #11 +N	0.224849	0.143931	0.906504	-0.294114	0.743812			pub PUB26 #11 -N	-.13667*	0.0198005	2.10881e-05	-0.208068	-0.0652819
		pub PUB26 #14 +N	0.128765	0.143931	0.998541	-0.390198	0.647728			pub PUB26 #14 -N	-.11782*	0.0198005	0.000198874	-0.189216	-0.0464296
		pub PUB26T94A #11 +N	0.426907	0.143931	0.179793	-0.0920564	0.94587			pub PUB26T94A #11 -N	-.22624*	0.0198005	2.03353e-09	-0.297628	-0.154842
		pub PUB26T94A #13 +N	0.387297	0.143931	0.288092	-0.131666	0.90626			pub PUB26T94A #13 -N	-.22966*	0.0198005	1.49735e-09	-0.301055	-0.158268
		pub PUB26T94A #18 +N	0.339109	0.143931	0.468043	-0.179854	0.858073			pub PUB26T94A #18 -N	-.21201*	0.0198005	7.50695e-09	-0.283403	-0.140617
		pub PUB26T94D #10 +N	0.349404	0.143931	0.425831	-0.16956	0.868367			pub PUB26T94D #10 -N	0.00770913	0.0198005	1	-0.063684	0.0791022
		pub PUB26T94D #14 +N	0.305767	0.143931	0.612088	-0.213196	0.824731			pub PUB26T94D #14 -N	-0.0282909	0.0198005	0.945708	-0.099684	0.0431022
		pub PUB26T94D #15 +N	0.228344	0.143931	0.897875	-0.29062	0.747307			pub PUB26T94D #15 -N	0.000193086	0.0198005	1	-0.0712	0.0715862
	pub25 pub26 +N	Col-0 +N	0.16204	0.143931	0.990069	-0.356923	0.681003		pub25 pub26 -N	Col-0 -N	.09646*	0.0198005	0.00267476	0.0250671	0.167853
		atg5-1 +N	-0.0606005	0.143931	0.999999	-0.579564	0.458363			atg5-1 -N	.23277*	0.0198005	1.13725e-09	0.161379	0.304165
		pub PUB26 #9 +N	-0.00955168	0.143931	1	-0.528515	0.509412			pub PUB26 #9 -N	.10765*	0.0198005	0.00068464	0.036254	0.17904
		pub PUB26 #11 +N	0.164248	0.143931	0.988968	-0.354715	0.683212			pub PUB26 #11 -N	.09610*	0.0198005	0.00279521	0.0247042	0.16749
		pub PUB26 #14 +N	0.0681645	0.143931	0.999997	-0.450799	0.587128			pub PUB26 #14 -N	.11495*	0.0198005	0.000281628	0.0435565	0.186343
		pub PUB26T94A #11 +N	0.366306	0.143931	0.360591	-0.152657	0.88527			pub PUB26T94A #11 -N	0.00653702	0.0198005	1	-0.0648561	0.0779301
		pub PUB26T94A #13 +N	0.326696	0.143931	0.520802	-0.192267	0.84566			pub PUB26T94A #13 -N	0.00311072	0.0198005	1	-0.0682824	0.0745038
		pub PUB26T94A #18 +N	0.278509	0.143931	0.728166	-0.240454	0.797472			pub PUB26T94A #18 -N	0.020762	0.0198005	0.994369	-0.0506311	0.0921551
		pub PUB26T94D #10 +N	0.288803	0.143931	0.68535	-0.23016	0.807766			pub PUB26T94D #10 -N	.24048*	0.0198005	5.81745e-10	0.169088	0.311875
		pub PUB26T94D #14 +N	0.245167	0.143931	0.849985	-0.273796	0.76413			pub PUB26T94D #14 -N	.20448*	0.0198005	1.53444e-08	0.133088	0.275875
		pub PUB26T94D #15 +N	0.167743	0.143931	0.987033	-0.35122	0.686706			pub PUB26T94D #15 -N	.23297*	0.0198005	1.11809e-09	0.161572	0.304358
	pub PUB26 #9 +N	Col-0 +N	0.171592	0.143931	0.984607	-0.347371	0.690555		pub PUB26 #9 -N	Col-0 -N	-0.0111868	0.0198005	0.999982	-0.0825799	0.0602063
		atg5-1 +N	-0.0510488	0.143931	1	-0.570012	0.467914			atg5-1 -N	.12513*	0.0198005	8.26365e-05	0.0537321	0.196518
		pub25 pub26 +N	0.00955168	0.143931	1	-0.509412	0.528515			pub25 pub26 -N	-.10765*	0.0198005	0.00068464	-0.17904	-0.036254
		pub PUB26 #11 +N	0.1738	0.143931	0.983066	-0.345163	0.692763			pub PUB26 #11 -N	-0.0115498	0.0198005	0.999975	-0.0829429	0.0598434
		pub PUB26 #14 +N	0.0777162	0.143931	0.999988	-0.441247	0.596679			pub PUB26 #14 -N	0.00730253	0.0198005	1	-0.0640906	0.0786956
		pub PUB26T94A #11 +N	0.375858	0.143931	0.326349	-0.143105	0.894821			pub PUB26T94A #11 -N	-.10111*	0.0198005	0.00151923	-0.172503	-0.0297169
		pub PUB26T94A #13 +N	0.336248	0.143931	0.480048	-0.182715	0.855211			pub PUB26T94A #13 -N	-.10454*	0.0198005	0.00100046	-0.175929	-0.0331432
		pub PUB26T94A #18 +N	0.288061	0.143931	0.688493	-0.230903	0.807024			pub PUB26T94A #18 -N	-.08689*	0.0198005	0.00846701	-0.158278	-0.0154919
		pub PUB26T94D #10 +N	0.298355	0.143931	0.644374	-0.220608	0.817318			pub PUB26T94D #10 -N	.13283*	0.0198005	3.30913e-05	0.0614413	0.204227
		pub PUB26T94D #14 +N	0.254719	0.143931	0.818374	-0.264245	0.773682			pub PUB26T94D #14 -N	.09683*	0.0198005	0.00255599	0.0254412	0.168227
		pub PUB26T94D #15 +N	0.177295	0.143931	0.98039	-0.341668	0.696258			pub PUB26T94D #15 -N	.12532*	0.0198005	8.07508e-05	0.0539252	0.196711
	pub PUB26 #11 +N	Col-0 +N	-0.00220824	0.143931	1	-0.521171	0.516755		pub PUB26 #11 -N	Col-0 -N	0.000362939	0.0198005	1	-0.0710302	0.071756
		atg5-1 +N	-0.224849	0.143931	0.906504	-0.743812	0.294114			atg5-1 -N	.13667*	0.0198005	2.10881e-05	0.0652819	0.208068
		pub25 pub26 +N	-0.164248	0.143931	0.988968	-0.683212	0.354715			pub25 pub26 -N	-.09610*	0.0198005	0.00279521	-0.16749	-0.0247042
		pub PUB26 #9 +N	-0.1738	0.143931	0.983066	-0.692763	0.345163			pub PUB26 #9 -N	0.0115498	0.0198005	0.999975	-0.0598434	0.0829429
		pub PUB26 #14 +N	-0.0960839	0.143931	0.999904	-0.615047	0.422879			pub PUB26 #14 -N	0.0188523	0.0198005	0.99749	-0.0525408	0.0902454
		pub PUB26T94A #11 +N	0.202058	0.143931	0.95154	-0.316905	0.721021			pub PUB26T94A #11 -N	-.08956*	0.0198005	0.00615177	-0.160953	-0.0181672
		pub PUB26T94A #13 +N	0.162448	0.143931	0.989873	-0.356515	0.681411			pub PUB26T94A #13 -N	-.09299*	0.0198005	0.0040734	-0.16438	-0.0215935
		pub PUB26T94A #18 +N	0.11426	0.143931	0.999505	-0.404703	0.633224			pub PUB26T94A #18 -N	-.07534*	0.0198005	0.0323315	-0.146728	-0.00394218
		pub PUB26T94D #10 +N	0.124555	0.143931	0.998914	-0.394408	0.643518			pub PUB26T94D #10 -N	.14438*	0.0198005	8.63904e-06	0.072991	0.215777
		pub PUB26T94D #14 +N	0.0809185	0.143931	0.999983	-0.438045	0.599882			pub PUB26T94D #14 -N	.10838*	0.0198005	0.000625818	0.036991	0.179777
		pub PUB26T94D #15 +N	0.00349478	0.143931	1	-0.515468	0.522458			pub PUB26T94D #15 -N	.13687*	0.0198005	2.06179e-05	0.065475	0.208261
	pub PUB26 #14 +N	Col-0 +N	0.0938756	0.143931	0.999924	-0.425088	0.612839		pub PUB26 #14 -N	Col-0 -N	-0.0184893	0.0198005	0.997877	-0.0898824	0.0529038
		atg5-1 +N	-0.128765	0.143931	0.998541	-0.647728	0.390198			atg5-1 -N	.11782*	0.0198005	0.000198874	0.0464296	0.189216
		pub25 pub26 +N	-0.0681645	0.143931	0.999997	-0.587128	0.450799			pub25 pub26 -N	-.11495*	0.0198005	0.000281628	-0.186343	-0.0435565
		pub PUB26 #9 +N	-0.0777162	0.143931	0.999988	-0.596679	0.441247			pub PUB26 #9 -N	-0.00730253	0.0198005	1	-0.0786956	0.0640906
		pub PUB26 #11 +N	0.0960839	0.143931	0.999904	-0.422879	0.615047			pub PUB26 #11 -N	-0.0188523	0.0198005	0.99749	-0.0902454	0.0525408
		pub PUB26T94A #11 +N	0.298142	0.143931	0.645297	-0.220821	0.817105			pub PUB26T94A #11 -N	-.10841*	0.0198005	0.00062365	-0.179806	-0.0370195
		pub PUB26T94A #13 +N	0.258532	0.143931	0.804941	-0.260431	0.777495			pub PUB26T94A #13 -N	-.11184*	0.0198005	0.000410928	-0.183232	-0.0404458
		pub PUB26T94A #18 +N	0.210344	0.143931	0.937385	-0.308619	0.729308			pub PUB26T94A #18 -N	-.09419*	0.0198005	0.00352299	-0.165581	-0.0227945
		pub PUB26T94D #10 +N	0.220639	0.143931	0.916285	-0.298325	0.739602			pub PUB26T94D #10 -N	.12553*	0.0198005	7.87164e-05	0.0541387	0.196925
		pub PUB26T94D #14 +N	0.177002	0.143931	0.980626	-0.341961	0.695966			pub PUB26T94D #14 -N	.08953*	0.0198005	0.00617279	0.0181387	0.160925
		pub PUB26T94D #15 +N	0.0995787	0.143931	0.999865	-0.419385	0.618542			pub PUB26T94D #15 -N	.11802*	0.0198005	0.000194286	0.0466227	0.189409
	pub PUB26T94A #11 +N	Col-0 +N	-0.204266	0.143931	0.948008	-0.723229	0.314697		pub PUB26T94A #11 -N	Col-0 -N	.08992*	0.0198005	0.0058898	0.0185301	0.161316
		atg5-1 +N	-0.426907	0.143931	0.179793	-0.94587	0.0920564			atg5-1 -N	.22624*	0.0198005	2.03353e-09	0.154842	0.297628
		pub25 pub26 +N	-0.366306	0.143931	0.360591	-0.88527	0.152657			pub25 pub26 -N	-0.00653702	0.0198005	1	-0.0779301	0.0648561
		pub PUB26 #9 +N	-0.375858	0.143931	0.326349	-0.894821	0.143105			pub PUB26 #9 -N	.10111*	0.0198005	0.00151923	0.0297169	0.172503
		pub PUB26 #11 +N	-0.202058	0.143931	0.95154	-0.721021	0.316905			pub PUB26 #11 -N	.08956*	0.0198005	0.00615177	0.0181672	0.160953
		pub PUB26 #14 +N	-0.298142	0.143931	0.645297	-0.817105	0.220821			pub PUB26 #14 -N	.10841*	0.0198005	0.00062365	0.0370195	0.179806
		pub PUB26T94A #13 +N	-0.03961	0.143931	1	-0.558573	0.479353			pub PUB26T94A #13 -N	-0.0034263	0.0198005	1	-0.0748194	0.0679668
		pub PUB26T94A #18 +N	-0.0877975	0.143931	0.999961	-0.606761	0.431166			pub PUB26T94A #18 -N	0.014225	0.0198005	0.999806	-0.0571681	0.0856181
		pub PUB26T94D #10 +N	-0.0775032	0.143931	0.999989	-0.596466	0.44146			pub PUB26T94D #10 -N	.23394*	0.0198005	1.02598e-09	0.162551	0.305338
		pub PUB26T94D #14 +N	-0.121139	0.143931	0.999154	-0.640103	0.397824			pub PUB26T94D #14 -N	.19794*	0.0198005	2.8939e-08	0.126551	0.269338
		pub PUB26T94D #15 +N	-0.198563	0.143931	0.956786	-0.717526	0.3204			pub PUB26T94D #15 -N	.22643*	0.0198005	1.99858e-09	0.155035	0.297821
	pub PUB26T94A #13 +N	Col-0 +N	-0.164656	0.143931	0.988755	-0.683619	0.354307		pub PUB26T94A #13 -N	Col-0 -N	.09335*	0.0198005	0.00389869	0.0219564	0.164743
		atg5-1 +N	-0.387297	0.143931	0.288092	-0.90626	0.131666			atg5-1 -N	.22966*	0.0198005	1.49735e-09	0.158268	0.301055
		pub25 pub26 +N	-0.326696	0.143931	0.520802	-0.84566	0.192267			pub25 pub26 -N	-0.00311072	0.0198005	1	-0.0745038	0.0682824
		pub PUB26 #9 +N	-0.336248	0.143931	0.480048	-0.855211	0.182715			pub PUB26 #9 -N	.10454*	0.0198005	0.00100046	0.0331432	0.175929
		pub PUB26 #11 +N	-0.162448	0.143931	0.989873	-0.681411	0.356515			pub PUB26 #11 -N	.09299*	0.0198005	0.0040734	0.0215935	0.16438
		pub PUB26 #14 +N	-0.258532	0.143931	0.804941	-0.777495	0.260431			pub PUB26 #14 -N	.11184*	0.0198005	0.000410928	0.0404458	0.183232
		pub PUB26T94A #11 +N	0.03961	0.143931	1	-0.479353	0.558573			pub PUB26T94A #11 -N	0.0034263	0.0198005	1	-0.0679668	0.0748194
		pub PUB26T94A #18 +N	-0.0481875	0.143931	1	-0.567151	0.470776			pub PUB26T94A #18 -N	0.0176513	0.0198005	0.998586	-0.0537418	0.0890444
		pub PUB26T94D #10 +N	-0.0378932	0.143931	1	-0.556856	0.48107			pub PUB26T94D #10 -N	.23737*	0.0198005	7.60956e-10	0.165978	0.308764
		pub PUB26T94D #14 +N	-0.0815295	0.143931	0.999981	-0.600493	0.437434			pub PUB26T94D #14 -N	.20137*	0.0198005	2.0719e-08	0.129978	0.272764
		pub PUB26T94D #15 +N	-0.158953	0.143931	0.991462	-0.677916	0.36001			pub PUB26T94D #15 -N	.22985*	0.0198005	1.47189e-09	0.158462	0.301248
	pub PUB26T94A #18 +N	Col-0 +N	-0.116469	0.143931	0.999409	-0.635432	0.402495		pub PUB26T94A #18 -N	Col-0 -N	.07570*	0.0198005	0.0310388	0.00430512	0.147091
		atg5-1 +N	-0.339109	0.143931	0.468043	-0.858073	0.179854			atg5-1 -N	.21201*	0.0198005	7.50695e-09	0.140617	0.283403
		pub25 pub26 +N	-0.278509	0.143931	0.728166	-0.797472	0.240454			pub25 pub26 -N	-0.020762	0.0198005	0.994369	-0.0921551	0.0506311
		pub PUB26 #9 +N	-0.288061	0.143931	0.688493	-0.807024	0.230903			pub PUB26 #9 -N	.08689*	0.0198005	0.00846701	0.0154919	0.158278
		pub PUB26 #11 +N	-0.11426	0.143931	0.999505	-0.633224	0.404703			pub PUB26 #11 -N	.07534*	0.0198005	0.0323315	0.00394218	0.146728
		pub PUB26 #14 +N	-0.210344	0.143931	0.937385	-0.729308	0.308619			pub PUB26 #14 -N	.09419*	0.0198005	0.00352299	0.0227945	0.165581
		pub PUB26T94A #11 +N	0.0877975	0.143931	0.999961	-0.431166	0.606761			pub PUB26T94A #11 -N	-0.014225	0.0198005	0.999806	-0.0856181	0.0571681
		pub PUB26T94A #13 +N	0.0481875	0.143931	1	-0.470776	0.567151			pub PUB26T94A #13 -N	-0.0176513	0.0198005	0.998586	-0.0890444	0.0537418
		pub PUB26T94D #10 +N	0.0102943	0.143931	1	-0.508669	0.529258			pub PUB26T94D #10 -N	.21972*	0.0198005	3.67254e-09	0.148326	0.291113
		pub PUB26T94D #14 +N	-0.033342	0.143931	1	-0.552305	0.485621			pub PUB26T94D #14 -N	.18372*	0.0198005	1.20417e-07	0.112326	0.255112
		pub PUB26T94D #15 +N	-0.110766	0.143931	0.999629	-0.629729	0.408198			pub PUB26T94D #15 -N	.21220*	0.0198005	7.37218e-09	0.14081	0.283596
	pub PUB26T94D #10 +N	Col-0 +N	-0.126763	0.143931	0.99873	-0.645726	0.3922		pub PUB26T94D #10 -N	Col-0 -N	-.14402*	0.0198005	9.00635e-06	-0.215414	-0.0726281
		atg5-1 +N	-0.349404	0.143931	0.425831	-0.868367	0.16956			atg5-1 -N	-0.00770913	0.0198005	1	-0.0791022	0.063684
		pub25 pub26 +N	-0.288803	0.143931	0.68535	-0.807766	0.23016			pub25 pub26 -N	-.24048*	0.0198005	5.81745e-10	-0.311875	-0.169088
		pub PUB26 #9 +N	-0.298355	0.143931	0.644374	-0.817318	0.220608			pub PUB26 #9 -N	-.13283*	0.0198005	3.30913e-05	-0.204227	-0.0614413
		pub PUB26 #11 +N	pub PUB26T94D #15 +N	0.143931	0.998914	-0.643518	0.394408			pub PUB26 #11 -N	-.14438*	0.0198005	8.63904e-06	-0.215777	-0.072991
		pub PUB26 #14 +N	-0.220639	0.143931	0.916285	-0.739602	0.298325			pub PUB26 #14 -N	-.12553*	0.0198005	7.87164e-05	-0.196925	-0.0541387
		pub PUB26T94A #11 +N	0.0775032	0.143931	0.999989	-0.44146	0.596466			pub PUB26T94A #11 -N	-.23394*	0.0198005	1.02598e-09	-0.305338	-0.162551
		pub PUB26T94A #13 +N	0.0378932	0.143931	1	-0.48107	0.556856			pub PUB26T94A #13 -N	-.23737*	0.0198005	7.60956e-10	-0.308764	-0.165978
		pub PUB26T94A #18 +N	-0.0102943	0.143931	1	-0.529258	0.508669			pub PUB26T94A #18 -N	-.21972*	0.0198005	3.67254e-09	-0.291113	-0.148326
		pub PUB26T94D #14 +N	-0.0436363	0.143931	1	-0.5626	0.475327			pub PUB26T94D #14 -N	-0.036	0.0198005	0.793498	-0.107393	0.0353931
		pub PUB26T94D #15 +N	-0.12106	0.143931	0.999159	-0.640023	0.397903			pub PUB26T94D #15 -N	-0.00751604	0.0198005	1	-0.0789091	0.0638771
	pub PUB26T94D #14 +N	Col-0 +N	-0.0831267	0.143931	0.999977	-0.60209	0.435837		pub PUB26T94D #14 -N	Col-0 -N	-.10802*	0.0198005	0.000654121	-0.179414	-0.0366281
		atg5-1 +N	-0.305767	0.143931	0.612088	-0.824731	0.213196			atg5-1 -N	0.0282909	0.0198005	0.945708	-0.0431022	0.099684
		pub25 pub26 +N	-0.245167	0.143931	0.849985	-0.76413	0.273796			pub25 pub26 -N	-.20448*	0.0198005	1.53444e-08	-0.275875	-0.133088
		pub PUB26 #9 +N	-0.254719	0.143931	0.818374	-0.773682	0.264245			pub PUB26 #9 -N	-.09683*	0.0198005	0.00255599	-0.168227	-0.0254412
		pub PUB26 #11 +N	-0.0809185	0.143931	0.999983	-0.599882	0.438045			pub PUB26 #11 -N	-.10838*	0.0198005	0.000625818	-0.179777	-0.036991
		pub PUB26 #14 +N	-0.177002	0.143931	0.980626	-0.695966	0.341961			pub PUB26 #14 -N	-.08953*	0.0198005	0.00617279	-0.160925	-0.0181387
		pub PUB26T94A #11 +N	0.121139	0.143931	0.999154	-0.397824	0.640103			pub PUB26T94A #11 -N	-.19794*	0.0198005	2.8939e-08	-0.269338	-0.126551
		pub PUB26T94A #13 +N	0.0815295	0.143931	0.999981	-0.437434	0.600493			pub PUB26T94A #13 -N	-.20137*	0.0198005	2.0719e-08	-0.272764	-0.129978
		pub PUB26T94A #18 +N	0.033342	0.143931	1	-0.485621	0.552305			pub PUB26T94A #18 -N	-.18372*	0.0198005	1.20417e-07	-0.255112	-0.112326
		pub PUB26T94D #10 +N	0.0436363	0.143931	1	-0.475327	0.5626			pub PUB26T94D #10 -N	0.036	0.0198005	0.793498	-0.0353931	0.107393
		pub PUB26T94D #15 +N	-0.0774237	0.143931	0.999989	-0.596387	0.44154			pub PUB26T94D #15 -N	0.028484	0.0198005	0.943303	-0.0429091	0.0998771
	pub PUB26T94D #15 +N	Col-0 +N	-0.00570302	0.143931	1	-0.524666	0.51326		pub PUB26T94D #15 -N	Col-0 -N	-.13651*	0.0198005	2.15108e-05	-0.207898	-0.065112
		atg5-1 +N	-0.228344	0.143931	0.897875	-0.747307	0.29062			atg5-1 -N	-0.000193086	0.0198005	1	-0.0715862	0.0712
		pub25 pub26 +N	-0.167743	0.143931	0.987033	-0.686706	0.35122			pub25 pub26 -N	-.23297*	0.0198005	1.11809e-09	-0.304358	-0.161572
		pub PUB26 #9 +N	-0.177295	0.143931	0.98039	-0.696258	0.341668			pub PUB26 #9 -N	-.12532*	0.0198005	8.07508e-05	-0.196711	-0.0539252
		pub PUB26 #11 +N	-0.00349478	0.143931	1	-0.522458	0.515468			pub PUB26 #11 -N	-.13687*	0.0198005	2.06179e-05	-0.208261	-0.065475
		pub PUB26 #14 +N	-0.0995787	0.143931	0.999865	-0.618542	0.419385			pub PUB26 #14 -N	-.11802*	0.0198005	0.000194286	-0.189409	-0.0466227
		pub PUB26T94A #11 +N	0.198563	0.143931	0.956786	-0.3204	0.717526			pub PUB26T94A #11 -N	-.22643*	0.0198005	1.99858e-09	-0.297821	-0.155035
		pub PUB26T94A #13 +N	0.158953	0.143931	0.991462	-0.36001	0.677916			pub PUB26T94A #13 -N	-.22985*	0.0198005	1.47189e-09	-0.301248	-0.158462
		pub PUB26T94A #18 +N	0.110766	0.143931	0.999629	-0.408198	0.629729			pub PUB26T94A #18 -N	-.21220*	0.0198005	7.37218e-09	-0.283596	-0.14081
		pub PUB26T94D #10 +N	0.12106	0.143931	0.999159	-0.397903	0.640023			pub PUB26T94D #10 -N	0.00751604	0.0198005	1	-0.0638771	0.0789091
		pub PUB26T94D #14 +N	0.0774237	0.143931	0.999989	-0.44154	0.596387			pub PUB26T94D #14 -N	-0.028484	0.0198005	0.943303	-0.0998771	0.0429091
		Fig.7g
			PUB26					PUB2694A					PUB2694A vs PUB26		PUB2694D					PUB2694D vs PUB26
			R1	R2	R3	Mean	SD	R1	R2	R3	Mean	SD			R1	R2	R3	Mean	SD
		0 h	1.0053	1.00462	0.99988	1.00326	0.00295053	0.867093	0.996108	0.808889	0.890697	0.0958155	0.111714	ns	0.874485	0.876031	0.741016	0.830511	0.0775087	0.0181836	*
		24 h	0.95915	1.05477	0.986893	1.00027	0.049196	2.93113	2.74794	2.22938	2.63615	0.363989	0.00151996	**	0.862902	0.81643	0.794299	0.824544	0.0350136	0.00727895	**
		36 h	1.43522	1.42066	1.39907	1.41832	0.0181886	2.87065	2.55214	2.16745	2.53008	0.352121	0.00546529	**	1.19985	1.2953	1.21056	1.23523	0.0522902	0.00459953	**
		48 h	1.63999	1.54164	1.65468	1.6121	0.0614625	2.98094	2.89356	2.51554	2.79668	0.24736	0.001293	**	1.20581	1.23346	1.04888	1.16272	0.0995488	0.00265066	**
		Fig.7h
			R1	R2	R3	Mean	SD		t test p value			t test p value
	Col-0	0 h	1.00013	1.00003	1.00005	1.00007	5.57389e-05
		24 h	1.1613	1.56592	1.13541	1.28754	0.241426
		48 h	1.47399	1.90088	1.43787	1.60425	0.257527
	pub25 pub26	0 h	0.959428	1.282	1.12301	1.12148	0.161292	pub25 pub26 0 h vs. Col-0 0 h	0.262276	ns
		24 h	1.73719	1.77092	1.74958	1.75256	0.0170598	pub25 pub26 24 h vs. Col-0 24 h	0.0291631	*
		48 h	2.27898	2.513	2.32162	2.3712	0.124642	pub25 pub26 48 h vs. Col-0 48 h	0.00971183	**
	fer-4	0 h	2.15491	2.68809	2.12238	2.32179	0.317637	fer-4 0 h vs. Col-0 0 h	0.00196467	**
		24 h	3.6174	4.58318	3.43176	3.87745	0.61819	fer-4 24 h vs. Col-0 24 h	0.00249862	**
		48 h	3.33159	4.7269	3.41487	3.82445	0.782652	fer-4 48 h vs. Col-0 48 h	0.00953773	**
	pub25 pub26 fer-4	0 h	1.96573	2.4337	2.08805	2.16249	0.242703	pub25 pub26 fer-4 0 h vs. Col-0 0 h	0.00115294	**	pub25 pub26 fer-4 0 h vs. fer-4 0 h	0.528017	ns
		24 h	3.24611	4.58673	3.41206	3.7483	0.730828	pub25 pub26 fer-4 24 h vs. Col-0 24 h	0.00519853	**	pub25 pub26 fer-4 24 h vs. fer-4 24 h	0.826706	ns
		48 h	3.17668	4.5545	3.50985	3.74701	0.718876	pub25 pub26 fer-4 48 h vs. Col-0 48 h	0.00827755	**	pub25 pub26 fer-4 48 h vs. fer-4 48 h	0.905648	ns
		Fig.7i
			R1	R2	R3	Mean	SD		t test p value			t test p value
	Col-0	0 h	1	1	1	1	1.58601e-07
		24 h	2.31951	2.58384	2.34528	2.41621	0.145741
		48 h	3.82672	3.88361	3.58117	3.76384	0.160728
	fer-4	0 h	1.9481	2.23985	2.19582	2.12792	0.157281	fer-4 0 h vs. Col-0 0 h	0.000241528	***
		24 h	6.99127	6.84923	6.60822	6.81624	0.193645	fer-4 24 h vs. Col-0 24 h	6.09551e-06	***
		48 h	5.48929	5.59563	5.2427	5.44254	0.181049	fer-4 48 h vs. Col-0 48 h	0.000275538	***
	PUB26-OX	0 h	0.604576	0.586115	0.546551	0.579081	0.0296452	PUB26-OX 0 h vs. Col-0 0 h	1.62241e-05	***
		24 h	0.966295	1.04595	0.945346	0.985865	0.0530815	PUB26-OX 24 h vs. Col-0 24 h	8.98268e-05	***
		48 h	1.81265	1.90432	1.82635	1.84777	0.0494497	PUB26-OX 48 h vs. Col-0 48 h	3.8886e-05	***
	PUB26-OX/fer-4	0 h	1.80656	1.87044	1.75874	1.81191	0.0560389	PUB26-OX/fer-4 0 h vs. Col-0 0 h	1.49707e-05	***	PUB26-OX/fer-4 0 h vs. fer-4 0 h	0.030554	*
		24 h	5.8149	5.69956	5.8205	5.77832	0.0682647	PUB26-OX/fer-4 24 h vs. Col-0 24 h	3.48234e-06	***	PUB26-OX/fer-4 24 h vs. fer-4 24 h	0.000937892	***
		48 h	4.2924	4.52195	4.19058	4.33498	0.169741	PUB26-OX/fer-4 48 h vs. Col-0 48 h	0.0133506	*	PUB26-OX/fer-4 48 h vs. fer-4 48 h	0.00150837	**

## Sheet: Fig.8
	Fig.8h
			R1	R2	R3	Mean	SD		t test p value
	YFP-ATG13a/Col-0	0 h	1	1	1	1	1.14232e-07
		24 h	1.59479	1.49156	1.58328	1.55654	0.0565709
		48 h	1.81275	1.6947	1.77504	1.76083	0.0602983
	YFP-ATG13a/fer-4	0 h	1.89257	1.81105	1.86601	1.85654	0.0415736	YFP-ATG13a/Col-0 0 h vs. YFP-ATG13a/fer-4 0 h	3.68056e-06	***
		24 h	2.27027	2.07232	2.26452	2.20237	0.112667	YFP-ATG13a/Col-0 24 h vs. YFP-ATG13a/fer-4 24 h	0.000891264	***
		48 h	2.63755	2.42947	2.55509	2.5407	0.104785	YFP-ATG13a/Col-0 48 h vs. YFP-ATG13a/fer-4 48 h	0.000365273	***
