# Supplementary material
Source: Research Square preprint supplement (doi:10.21203/rs.3.rs-9554211/v1)
Supplement: Supplementary file 8 [file e531825e239d558050a3911d.xlsx]

## Sheet: ATG
Autophagy related proteins possibly interact with PUB26 identifed by lP-MS.
	Sequence	Mass	Proteins	Leading razor protein	Charges	Score
PUB26	GLATVELLCR	1130.61	AT1G49780.1	AT1G49780.1	2	146.27
	HLAISAGAPGILIDR	1502.86	AT1G49780.1	AT1G49780.1	2	159.44
	IPTPKQPADPISVR	1517.86	AT1G49780.1	AT1G49780.1	3	31.801
	LAADFDR	806.392	AT1G49780.1;AT3G19380.1	AT1G49780.1	2	96.51
	LIISGSDSIFEGVLDLLK	1918.07	AT1G49780.1	AT1G49780.1	2	289.75
	LIQEWCVANR	1287.64	AT1G49780.1;AT3G19380.1	AT1G49780.1	2	162.49
	LLFDSSIEIR	1191.65	AT1G49780.1	AT1G49780.1	2	133.98
	LPEGCAAFGEHALTVPLMVK	2139.09	AT1G49780.1	AT1G49780.1	2;3	206.14
	LPEGCAAFGEHALTVPLMVKTILR	2622.4	AT1G49780.1	AT1G49780.1	3	113.66
	PGNLEPLDLGIQIPYHFR	2078.09	AT1G49780.1	AT1G49780.1	2;3	258
	QPADPISVR	981.524	AT1G49780.1	AT1G49780.1	2	40.502
	SLLSQASAITGTHVSVR	1725.94	AT1G49780.1	AT1G49780.1	2;3	87.727
	TSIDSWIAMGNTTCPVTR	2008.93	AT1G49780.1	AT1G49780.1	2	252.02
	VALSDFTLIPNHTLR	1695.93	AT1G49780.1	AT1G49780.1	2;3	126.21
	VNAAALIEMVLTGAK	1499.84	AT1G49780.1	AT1G49780.1	2	195.09
	VNAAALIEMVLTGAK	1499.84	AT1G49780.1	AT1G49780.1	2	195.09
	ATEYAAGALLALCTAEER	1908.93	AT1G49780.1;AT3G19380.1	AT1G49780.1	2	242.35
	CPISLDLMSDPVTISTGQTYDR	2468.16	AT1G49780.1	AT1G49780.1	2	98.328
	CRDEAAAAGLVTQLLLLVQSDCTER	2788.38	AT1G49780.1	AT1G49780.1	3	172.54
	DEAAAAGLVTQLLLLVQSDCTER	2472.25	AT1G49780.1	AT1G49780.1	2	68.127
	DSWPDDSTVHSDDFNR	1891.76	AT1G49780.1	AT1G49780.1	2	201.66
ATG18h	LHTSESSFK	1034.5	AT1G54710.1	AT1G54710.1	2	60.892
	NGPGAQSYDWSSSHVPLYK	2091.97	AT1G54710.1;AT1G54710.2	AT1G54710.1	3	65.784
	VEPVQCWDVCR	1446.64	AT1G54710.1;AT1G54710.2	AT1G54710.1	2	82.749
	VKVEPVQCWDVCR	1673.8	AT1G54710.1;AT1G54710.2	AT1G54710.1	3	58.294
	VSANEVDIR	1001.51	AT1G54710.1;AT1G54710.2	AT1G54710.1	2	68.625
	CDGVEGFR	938.392	AT1G54710.1;AT1G54710.2	AT1G54710.1	2	65.235
	EENICGLTYGGR	1367.61	AT1G54710.1;AT1G54710.2	AT1G54710.1	2	113.93
	HDGPGPSLSSSPGR	1349.63	AT1G54710.1;AT1G54710.2	AT1G54710.1	2	136.96
	HLAAGLLNLGDK	1220.69	AT1G54710.1;AT1G54710.2	AT1G54710.1	2	89.317
	SSHPILLAVADEAK	1449.78	AT1G54710.2;AT1G54710.1	AT1G54710.2	3	49.31
	DTDYIDDDAHVLPK	1615.74	AT1G54710.2;AT1G54710.1	AT1G54710.2	3	27.649
	LIPSLGGDQAESNTR	1556.78	AT1G54710.2;AT1G54710.1	AT1G54710.2	2	88.441
	NLNSHQGGGETEIGK	1539.73	AT1G54710.1;AT1G54710.2	AT1G54710.1	2	84.58
	RDDPVTFLQMQPLPAK	1854.97	AT1G54710.1	AT1G54710.1	3	43.613
	SASASVAASLSSDSHELK	1745.84	AT1G54710.1	AT1G54710.1	2	177.41
	SHNYVHVLR	1123.59	AT1G54710.1;AT1G54710.2	AT1G54710.1	2	83.623
	VGSHSAESDVVGTVIVK	1682.88	AT1G54710.1;AT1G54710.2	AT1G54710.1	2	108.91
	VNINNNGDNHNQTK	1580.73	AT1G54710.1	AT1G54710.1	2	123.92
	VSANEVDIR	1001.51	AT1G54710.1;AT1G54710.2	AT1G54710.1	2	30.918
ATG13a	VSSFSDIFSGPVTETMK	1830.87	AT3G49590.1;AT3G49590.2;AT3G49590.3	AT3G49590.1	2	66.485
	EGSVSGTESEFSMAR	1572.67	AT3G49590.1;AT3G49590.2;AT3G49590.3	AT3G49590.1	2	128.97
	INVRPGTAPVTIPSSATLNR	2063.15	AT3G49590.1;AT3G49590.2;AT3G49590.3	AT3G49590.1	3	38.839
	LEQIVSHFFPK	1343.72	AT3G49590.1;AT3G49590.2;AT3G49590.3	AT3G49590.1	2	54.584
	PGTAPVTIPSSATLNR	1580.85	AT3G49590.1;AT3G49590.2;AT3G49590.3	AT3G49590.1	2	76.255
	QDSSTYMASMSGVQR	1646.7	AT3G49590.1;AT3G49590.2;AT3G49590.3	AT3G49590.1	2	87.573
	QLSSSLASSGYDLIYK	1730.87	AT3G49590.1;AT3G49590.2;AT3G49590.3	AT3G49590.1	2	238.02
	SGESPSGLMNQYPTQK	1722.79	AT3G49590.1;AT3G49590.2;AT3G49590.3	AT3G49590.1	2	62.454
	SVEGHSFTGR	1075.5	AT3G49590.1;AT3G49590.2;AT3G49590.3	AT3G49590.1	2	65.404
	TSSSISQSLPLGR	1331.7	AT3G49590.1;AT3G49590.2;AT3G49590.3	AT3G49590.1	2	93.448
ATG4a	AWESLACK	963.448	AT2G44140.4;AT2G44140.2;AT2G44140.3;AT2G44140.1;AT2G44140.5	AT2G44140.4	2	60.799
	DKDDFDDFCLR	1444.59	AT2G44140.4;AT2G44140.2;AT2G44140.3;AT2G44140.1	AT2G44140.4	3	47.57
	ETPDVDTSSYHCNVLR	1891.84	AT2G44140.4;AT2G44140.2;AT2G44140.3;AT2G44140.1	AT2G44140.4	3	133.14
	GFYLDPHEVQQVVTVNK	1972.01	AT2G44140.4;AT2G44140.2;AT2G44140.3;AT2G44140.1;AT2G44140.5	AT2G44140.4	3	79.013
	GQSEWTPIILLVPLVLGLDSVNPR	2615.47	AT2G44140.4;AT2G44140.2;AT2G44140.3;AT2G44140.1;AT2G44140.5	AT2G44140.4	3	156.1
	PGASTYIVGVQEDK	1462.73	AT2G44140.4;AT2G44140.2;AT2G44140.3;AT2G44140.1;AT2G44140.5;AT3G59950.4;AT3G59950.5;AT3G59950.1	AT2G44140.4	2	186.46
ATG6	GASSPQPDATQSGK	1329.62	AT3G61710.3;AT3G61710.2;AT3G61710.4;AT3G61710.1	AT3G61710.3	2	147.62
	IEVSQAHLELLNK	1492.82	AT3G61710.3;AT3G61710.2;AT3G61710.4;AT3G61710.1	AT3G61710.3	3	124.42
	LVAAIEETEK	1101.59	AT3G61710.3;AT3G61710.2;AT3G61710.4;AT3G61710.1	AT3G61710.3	2	70.747
	NDGEFGTINNFR	1382.62	AT3G61710.3;AT3G61710.2;AT3G61710.4;AT3G61710.1	AT3G61710.3	2	58.889
ATG11	THHLCSDQGSR	1296.56	AT4G30790.1	AT4G30790.1	2	36.24
	AVENCASSHR	1129.49	AT4G30790.1	AT4G30790.1	2	36.24
ATG1a	DLKPQNLLLSSK	1354.78	AT3G61960.2;AT3G61960.1	AT3G61960.2	2	80.623
	EISILSTIDHPNIIR	1719.95	AT3G61960.2;AT3G61960.1	AT3G61960.2	2	117.45

## Sheet: Kinase
Screening of potential kinases that interact with PUB26 by IP-MS analysis.
	Sequence	Mass	Proteins	Leading razor protein	Charges	Score	PUB26+N	PUB26-N
PUB26	AIFALCLVK	1033.6	AT1G49780.1	AT1G49780.1	2	91.041	Yes	Yes
	ATEYAAGALLALCTAEER	1908.93	AT1G49780.1;AT3G19380.1	AT1G49780.1	2;3	335.2	Yes	Yes
	CPISLDLMSDPVTISTGQTYDR	2468.16	AT1G49780.1	AT1G49780.1	2;3	425.9	Yes	Yes
	CRDEAAAAGLVTQLLLLVQSDCTER	2788.38	AT1G49780.1	AT1G49780.1	2;3;4	450.13	Yes	Yes
	DSWPDDSTVHSDDFNR	1891.76	AT1G49780.1	AT1G49780.1	2;3	106.19	Yes	Yes
	GLATVELLCR	1130.61	AT1G49780.1	AT1G49780.1	2	285.47	Yes	Yes
	HLAISAGAPGILIDR	1502.86	AT1G49780.1	AT1G49780.1	2;3	247.13	Yes	Yes
	ILFADIETTSLSSELVSESLALLVLLHMTETECEAVASDPSR	4576.28	AT1G49780.1	AT1G49780.1	4	242.83	Yes	Yes
	IPTPKQPADPISVR	1517.86	AT1G49780.1	AT1G49780.1	2;3	125.97	Yes	Yes
	LAADFDRCDTER	1467.64	AT1G49780.1;AT3G19380.1	AT1G49780.1	2;3	103.44	Yes	Yes
	LIISGSDSIFEGVLDLLKNPISSR	2572.41	AT1G49780.1	AT1G49780.1	3	123.43	Yes	Yes
	LLFDSSIEIR	1191.65	AT1G49780.1	AT1G49780.1	2	98.033	Yes	Yes
	LLRDSWPDDSTVHSDDFNR	2274.03	AT1G49780.1	AT1G49780.1	3;4	67.251	Yes	Yes
	LPEGCAAFGEHALTVPLMVKTILR	2622.4	AT1G49780.1	AT1G49780.1	3;4	122.39	Yes	No
	PGNLEPLDLGIQIPYHFR	2078.09	AT1G49780.1	AT1G49780.1	2;3	342.58	Yes	Yes
	QPADPISVR	981.524	AT1G49780.1	AT1G49780.1	2	102.51	Yes	Yes
	RLIQEWCVANR	1443.74	AT1G49780.1;AT3G19380.1	AT1G49780.1	2;3	116.55	Yes	Yes
	SLLSQASAITGTHVSVR	1725.94	AT1G49780.1	AT1G49780.1	2;3	313.32	Yes	Yes
	SNGVERIPTPKQPADPISVR	2160.17	AT1G49780.1	AT1G49780.1	3	55.469	Yes	No
	TSIDSWIAMGNTTCPVTR	2008.93	AT1G49780.1	AT1G49780.1	2;3	322.81	Yes	Yes
	VALSDFTLIPNHTLR	1695.93	AT1G49780.1	AT1G49780.1	2;3	262	Yes	Yes
	VLIAGHNAR	949.546	AT1G49780.1	AT1G49780.1	2;3	133.47	Yes	Yes
	VNAAALIEMVLTGAK	1499.84	AT1G49780.1	AT1G49780.1	2;3	230.59	Yes	Yes
OST1	DIGSGNFGVAR	1091.54	AT4G33950.2;AT4G33950.1	AT4G33950.2	2	68.224	Yes	Yes
	FSEDEAR	852.361	AT1G78290.3;AT1G78290.2;AT4G33950.2;AT4G33950.1	AT1G78290.3	2	97.473	Yes	No
	ICDFGYSK	988.432	AT4G40010.1;AT1G78290.3;AT1G78290.2;AT4G33950.2;AT4G33950.1;AT5G08590.2;AT5G08590.1;AT5G63650.1	AT1G78290.3	2	70.919	No	Yes
	IFVADPAK	859.48	AT4G33950.2;AT4G33950.1	AT4G33950.2	2	54.205	No	Yes
	LENTLLDGSPAPR	1381.72	AT4G33950.2;AT4G33950.1	AT4G33950.2	2	90.685	Yes	No
	SSVLHSQPK	981.524	AT4G40010.1;AT4G33950.2;AT4G33950.1	AT4G40010.1	2	46.334	Yes	No
	DIGSGNFGVAR	1091.54	AT4G33950.2;AT4G33950.1	AT4G33950.2	2	68.224	No	Yes
	NHEWFLK	972.482	AT4G33950.2;AT4G33950.1	AT4G33950.2	2	67.903	No	Yes
	STVGTPAYIAPEVLLK	1657.93	AT4G33950.2;AT4G33950.1	AT4G33950.2	2	88.734	No	Yes
	DKQSNELVAVK	1229.66	AT4G33950.2;AT4G33950.1	AT4G33950.2	2	101.45	Yes	No
CIPK26	CAVNTETGER	1135.49	AT5G21326.1	AT5G21326.1	2	131.22	Yes	No
	GAANDLVQK	914.482	AT5G21326.1	AT5G21326.1	2	77.282	Yes	No
	IEEASKPLGFDIQK	1573.84	AT5G21326.1	AT5G21326.1	3	37.177	Yes	Yes
	IIAGEYHCPPWLSPGAK	1894.94	AT5G21326.1	AT5G21326.1	3	63.691	Yes	Yes
	ILDPNPMTR	1055.54	AT5G21326.1;AT2G26980.1;AT2G26980.5;AT2G26980.3;AT2G26980.4;AT5G21222.4;AT5G21222.3;AT5G21222.2;AT5G21222.1	AT5G21326.1	2	56.659	Yes	No
	ITIPEVLGDAWFK	1487.8	AT5G21326.1	AT5G21326.1	2	104.79	Yes	No
	LINHPNVVR	1060.61	AT5G21326.1	AT5G21326.1	3	48.283	Yes	Yes
	LSTSLNDVVWK	1260.67	AT5G21326.1	AT5G21326.1	2	86.882	Yes	No
	VATEIFQVSPSLHMIEVR	2055.08	AT5G21326.1	AT5G21326.1	3	27.892	Yes	No
KIN11	FELQLYK	939.507	AT3G29160.2;AT3G29160.1	AT3G29160.2	2	100.82	Yes	Yes
	IAEHVVTGHK	1089.59	AT3G29160.2;AT3G29160.1;AT3G29160.3	AT3G29160.2	3	27.989	Yes	Yes
	LQEDEAR	859.404	AT3G29160.2;AT3G29160.1;AT3G29160.3;AT5G39440.1;AT3G01090.3;AT3G01090.1;AT3G01090.2	AT3G01090.3	2	76.035	Yes	No
	MDHSSNR	845.345	AT3G29160.2;AT3G29160.1;AT3G29160.3	AT3G29160.2	2	47.849	Yes	Yes
	NFFQQIISGVEYCHR	1896.89	AT3G29160.2;AT3G29160.1;AT3G29160.3;AT3G01090.3;AT3G01090.1;AT3G01090.2	AT3G01090.3	3	188.13	Yes	Yes
	NQVLESLR	957.524	AT3G29160.2;AT3G29160.1;AT3G29160.3	AT3G29160.2	2	125.5	Yes	Yes
	TLGIGSFGK	878.486	AT3G29160.2;AT3G29160.1;AT3G29160.3	AT3G29160.2	2	66.692	Yes	Yes
	TPEAGASPVGHWIPAHVDHYGLGAR	2594.28	AT3G29160.2;AT3G29160.1	AT3G29160.2	5	23.566	Yes	No
	YLAVSPPDTVEQAK	1516.78	AT3G29160.2;AT3G29160.1;AT3G29160.3	AT3G29160.2	2	54.471	Yes	Yes
MIK2	ITGELPESISNINR	1541.8	AT4G08850.1;AT4G08850.2	AT4G08850.1	2	97.911	No	Yes
	LNETTDSSISNPSTK	1592.75	AT4G08850.1;AT4G08850.2	AT4G08850.1	2	98.902	No	Yes
	LPNAIMAVK	955.552	AT4G08850.1;AT4G08850.2	AT4G08850.1	2	69.984	No	Yes
	LTGPIPSTLGNIK	1309.76	AT4G08850.1;AT4G08850.2	AT4G08850.1	2	90.913	No	Yes
	NDLDQTIPEGLTK	1442.73	AT4G08850.1;AT4G08850.2	AT4G08850.1	2	74.237	No	Yes
	VALLCLHSDPQAR	1478.77	AT4G08850.1	AT4G08850.1	3	70.622	No	Yes
	VLENDDEAK	1031.48	AT4G08850.1;AT4G08850.2	AT4G08850.1	2	84.743	No	Yes
ATVPS34	EADGSFPTSTPGK	1292.59	AT1G60490.1	AT1G60490.1	2	87.568	No	Yes
	GIVAGESSLFK	1106.6	AT1G60490.1	AT1G60490.1	2	62.201	Yes	Yes
	HLDNLLLTDDGR	1380.7	AT1G60490.1	AT1G60490.1	2	64.64	No	Yes
	QTELTAQLCSITR	1519.77	AT1G60490.1	AT1G60490.1	2	92.925	No	Yes
	SLAQILSEHR	1152.63	AT1G60490.1	AT1G60490.1	2	53.756	No	Yes
FERONIA	TGPTLDHTHVSTVVK	1590.84	AT3G51550.1	AT3G51550.1	3	59.884	Yes	Yes
	VLGVGGFGK	832.481	AT3G51550.1	AT3G51550.1	2	60.972	No	Yes
	FLSSSSEDSK	1085.49	AT3G51550.1	AT3G51550.1	2	66.299	Yes	Yes
	GMLDQIVDPYLK	1390.72	AT3G51550.1	AT3G51550.1	2	61.213	No	Yes
	HFSFAEIK	977.497	AT3G51550.1	AT3G51550.1	2	74.255	Yes	Yes
	SSGIDMSIGGR	1078.51	AT3G51550.1	AT3G51550.1	2	43.272	No	Yes
	LEICIGAAR	1001.53	AT3G51550.1;AT2G23200.1;AT5G54380.1;AT2G21480.1;AT5G39000.1;AT5G38990.1;AT3G46290.1	AT3G51550.1	2	42.835	Yes	Yes
	LNVGGNDISPSADTGLYR	1847.9	AT3G51550.1	AT3G51550.1	2	59.77	Yes	Yes
CPK6	LTAHEVLR	937.535	AT2G17290.2;AT2G17290.1;AT4G35310.2;AT4G35310.1	AT2G17290.2	3	56.729	Yes	Yes
	ALDPAVLSR	940.534	AT2G17290.2;AT2G17290.1;AT4G35310.2;AT4G35310.1;AT4G38230.1;AT4G38230.4;AT4G38230.3;AT4G38230.2	AT2G17290.2	2	56.729	Yes	Yes
	DLKPENFLLVNK	1428.8	AT4G35310.2;AT4G35310.1;AT2G17290.2;AT2G17290.1;AT4G38230.4;AT4G38230.3;AT4G38230.2;AT4G38230.1	AT4G35310.2	2	60.547	Yes	Yes
	IIVGVVEACHSLGVMHR	1875.98	AT4G35310.2;AT4G35310.1;AT2G17290.2;AT2G17290.1;AT4G38230.4;AT4G38230.3;AT4G38230.2	AT4G35310.2	2;3	45.183	Yes	Yes
CPK3	DLKPENFLFLSK	1449.79	AT4G23650.1	AT4G23650.1	2	92.781	Yes	Yes
	DLVGSAYYVAPEVLK	1622.86	AT4G23650.1	AT4G23650.1	2	72.958	Yes	Yes
	EVQIMHHLSGHR	1442.72	AT4G23650.1	AT4G23650.1	2	23.804	Yes	Yes
	GQFGVTYLVTHK	1348.71	AT4G23650.1	AT4G23650.1	2	112.93	Yes	Yes
	GSSGSGTVGSSGSGTGGSR	1540.67	AT4G23650.1	AT4G23650.1	2	146.34	Yes	Yes
	LTAAEVLNHPWIR	1518.83	AT4G23650.1	AT4G23650.1	2	191.24	Yes	No
	LVHKDDIEDVR	1337.69	AT4G23650.1	AT4G23650.1	2	64.266	Yes	Yes
	VIAENLSEEEIIGLK	1655.9	AT4G23650.1	AT4G23650.1	2	112.7	Yes	Yes
	ATDFGLSVFFKPGDK	1627.82	AT4G23650.1	AT4G23650.1	2	98.167	Yes	Yes
TOR	NAPVHSIHGSLLAVGELLR	1982.11	AT1G50030.2;AT1G50030.1	AT1G50030.2	2	9.9112	Yes	Yes
	NQQSLSGSHGEVPR	1494.72	AT1G50030.2;AT1G50030.1	AT1G50030.2	2	191.95	Yes	Yes
	VLGIMGALDPHVHK	1485.81	AT1G50030.2;AT1G50030.1	AT1G50030.2	2	64.906	Yes	Yes
	VLPELFHTVR	1209.69	AT1G50030.2;AT1G50030.1	AT1G50030.2	2	41.796	Yes	Yes
	AGGAMTSDEVEFQMK	1599.69	AT1G50030.2;AT1G50030.1	AT1G50030.2	2	40.861	Yes	Yes
	ALVLPPTEDVETWLK	1709.92	AT1G50030.2;AT1G50030.1	AT1G50030.2	2	33.1	Yes	Yes
	DAELTQAWDLYYHVFK	1997.95	AT1G50030.2;AT1G50030.1	AT1G50030.2	2	117.41	Yes	Yes
	EYPLLLGLLLK	1270.79	AT1G50030.2;AT1G50030.1	AT1G50030.2	2	72.038	Yes	Yes
	FCGPSATASGGGSFDTLNR	1900.84	AT1G50030.2;AT1G50030.1	AT1G50030.2	2	78.157	Yes	Yes
SOBIR1	SEINTVGHIR	1124.59	AT2G31880.1	AT2G31880.1	3	44.425	No	Yes
	IPEQIVSFHNLR	1451.79	AT2G31880.1	AT2G31880.1	3	65.563	No	Yes
